# Supplementary material
Source: MDPI journal article supplement (https://www.mdpi.com/2304-6740/10/3/35)
Supplement: s1 [file s1]

# **Phenolic 3° Phosphine Oxides as a Class of Metal-Free Catalysts for the Activation of C–O Bonds in Aliphatic Alcohols: Direct Synthesis of Catalyst Candidates, and Kinetic Studies.**

Matthew A. Martin, Sadie L. Brown, Danielle R. Beres, Wrebekah M. Frederic, Ashley M. Banks, and Aaron J. Bloomfield\*

## Supporting Information

### **Table of Contents**

|                                                                        |        |
|------------------------------------------------------------------------|--------|
| Materials.....                                                         | S2     |
| Small Scale (2–15 mmol) Synthetic Procedures.....                      | S2     |
| Large Scale (32+ mmol) Synthetic Procedures.....                       | S7     |
| Spectral Gallery .....                                                 | S10    |
| Materials, Methods, and Kinetics of 2-HOBPO Concentration Studies..... | S28    |
| Coordinates of Computed Structures.....                                | S33    |
| <br><b>Figure S1</b> .....                                             | <br>S8 |
| <b>Table S1</b> .....                                                  | S9     |

## Materials

Solvents and reagents were used as received, including: diphenylphosphine (Alfa Aesar), diethylphosphine (98%, Sigma Aldrich), salicylaldehyde (99%, Acros), 5-methylsalicylaldehyde (>98%, TCI America), 5-nitrosalicylaldehyde (>97%, TCI America), 5-methoxysalicylaldehyde (>96%, TCI America), trifluoroacetic acid (99%, Alfa Aesar), deuteriochloroform (99.8% D, Cambridge Isotopes), ( $\pm$ )-2-octanol (97%, Sigma Aldrich), 2,4-dinitrobenzoic acid (98% Alfa Aesar), and xylenes (Alfa Aesar).

## Instrumentation

$^1\text{H}$ ,  $^{13}\text{C}$ ,  $^{19}\text{F}$ , and  $^{31}\text{P}$  NMR were obtained using a 400 MHz Bruker AVANCE<sup>TM</sup> Spectrometer with a 5 mm multinuclear broad band (BBO) probe.  $^1\text{H}$  and  $^{13}\text{C}$  chemical shifts were referenced to a tetramethylsilane internal standard, and  $^{31}\text{P}$  chemical shifts were referenced to an 85 % phosphoric acid external standard.

Fourier-Transform infrared spectroscopy was obtained using a Nexus 470 spectrometer with an attenuated total reflectance (ATR) attachment.

Mass Spectroscopy was performed using an Agilent Technologies 6530 Accurate-Mass Q-TOF LC/MS in the positive ion mode, and was tuned with standard (3200) 4 GHz, HiRes.

## Synthetic Procedures

General procedure for the small-scale ARC reactions:

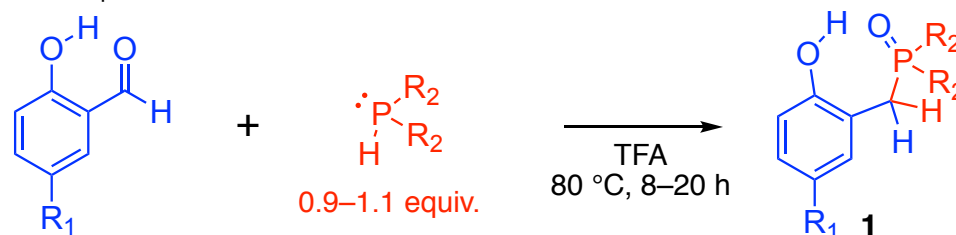

**Figure S1.** General ARC reaction scheme.

A Teflon-coated stir bar and 35 mL heavy-walled borosilicate pressure tube (Ace Glass Inc., “Tube C”, Product #864807) were oven-dried overnight and then allowed to cool to ambient temperature in air. The tube was then charged with the aldehyde, and then flushed gently with dry nitrogen gas. Then, while maintaining the gentle nitrogen flush, trifluoroacetic acid was added in a single portion, followed quickly by the phosphine, which was also added swiftly in one portion by syringe. The tube was then sealed with a threaded Teflon cap fitted with an o-ring. The sealed tube was then heated in an 80 °C oil bath behind a blast shield for 8–20 hours. The reaction vessel was then removed from the oil bath and allowed to cool for five minutes. Then the reaction tube was opened, and the contents were transferred into a 250 mL separatory funnel that had already been charged with 50 mL of half-saturated sodium bicarbonate (50 mL saturated sodium bicarbonate and 50 mL water). The reaction flask was rinsed with two 25 mL portions of dichloromethane, which were both transferred to the separatory funnel. After agitation, the layers were allowed to separate, and the organic layer was collected. The remaining aqueous phase was extracted with two more portions of dichloromethane (each 50 mL), and the organic phases were all combined, dried over sodium sulfate, and concentrated under vacuum to afford the crude product. Glassware that had contacted phosphines was rinsed in bleach (5 % sodium hypochlorite/water) to quench any residual phosphine, followed by water, and then methanol.

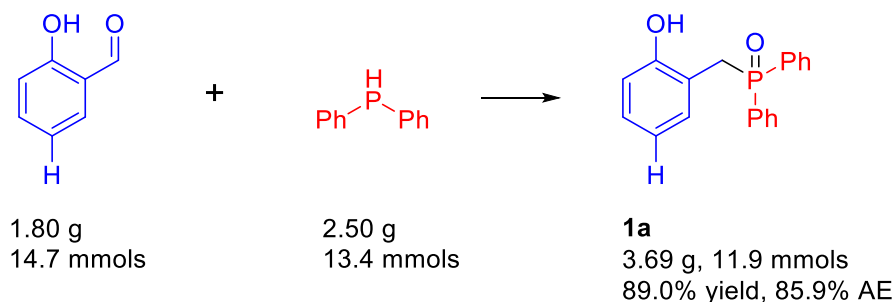

(2-Hydroxybenzyl)diphenylphosphine oxide (**1a**) (Table **S1** reaction # 1): Prepared from diphenylphosphine (2.5 g, 13.4 mmol, 1 equiv.) and 2-hydroxybenzaldehyde (1.80 g, 14.7 mmol, 1.10 equiv.) concentrated *in vacuo* for a lightly-colored powder (3.69 g 89.3%). Product was then characterized and found to be in agreement with previously reported literature.  $^{31}\text{P}\{^1\text{H}\}$  NMR (162 MHz)  $\delta_{\text{P}}$  37.86;  $^1\text{H}$  NMR (400 MHz,  $\text{CDCl}_3$ )  $\delta_{\text{H}}$  3.67 (d,  $J$  = 13.2 Hz, 2H), 6.61 (dd,  $J$  = 18.3, 10.7 Hz, 1H), 6.61 (dd,  $J$  = 18.3, 10.7 Hz, 1H), 6.80 (t,  $J$  = 8.7 Hz, 1H), 6.99 (t,  $J$  = 7.7 Hz, 1H), 7.40 (dd,  $J$  = 9.8, 4.8 Hz, 4H), 7.47 (t,  $J$  = 7.4 Hz, 2H), 7.67 – 7.58 (m, 4H), 9.26 (s, 1H). **MS** (ESI)  $\text{C}_{19}\text{H}_{17}\text{O}_2\text{P}$   $[\text{M}+\text{H}]^+$  calc: 309.1000, found: 309.1336; **TLC**  $R_f$  = 0.53 1:3 (EtOAc/Hexane).

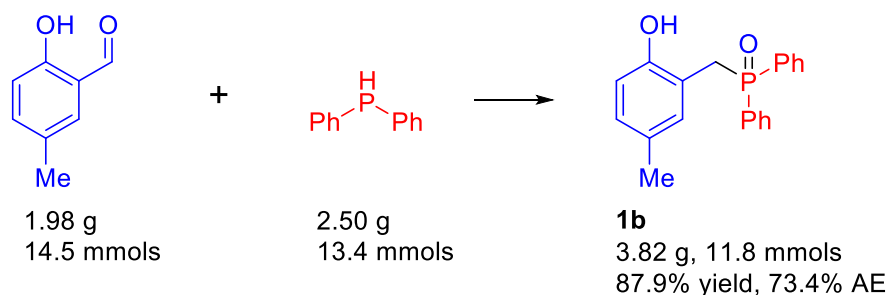

(2-Hydroxy-5-methylbenzyl)diphenylphosphine oxide (**1b**): Prepared from diphenylphosphine (2.5 g, 13.4 mmol, 1 equiv.) and 2-hydroxy-5-methylbenzaldehyde (1.98 g, 14.5 mmol, 1.8 equiv.) concentrated *in vacuo* to give **1b** as a pale white powder (3.82 g, 88.2%).  $^{31}\text{P}\{^1\text{H}\}$  NMR (162 MHz,  $\text{CDCl}_3$ )  $\delta_{\text{P}}$  38.12;  $^1\text{H}$  NMR (400 MHz,  $\text{CDCl}_3$ )  $\delta_{\text{H}}$  2.13 (s, 2H), 3.69 (d,  $J$  = 12.9 Hz, 1H), 6.59 (dd,  $J$  = 2.0, 1.1 Hz, 1H), 6.92 (d,  $J$  = 1.1 Hz, 1H), 7.50 (m,  $J$  = 9.8, 4.3, 2.5, 1.0 Hz, 4H), 7.53 – 7.60 (m, 2H), 7.70 – 7.79 (m, 4H), 10.7 (s, 1H);  $^{13}\text{C}$  NMR (101 MHz,  $\text{CDCl}_3$ )  $\delta_{\text{C}}$  20.34 (s), 35.26 (d,  $J$  = 67.5 Hz), 119.01 (d,  $J$  = 8.6 Hz), 119.29 (d,  $J$  = 2.6 Hz), 128.77 (d,  $J$  = 11.9 Hz), 129.48 (d,  $J$  = 2.9 Hz), 129.69 (d,  $J$  = 2.1 Hz), 130.6 (d,  $J$  = 98.9 Hz), 130.99 (d,  $J$  = 9.5 Hz), 132.09 (d,  $J$  = 6.5 Hz), 132.39 (d,  $J$  = 2.9 Hz), 154.21 (d,  $J$  = 4.1 Hz). **FTIR** (neat,  $\text{cm}^{-1}$ ): 3037, 2731, 1513, 1434, 1280, 1168, 1134, 1099; **MS** (ESI)  $\text{C}_{20}\text{H}_{19}\text{O}_2\text{P}$   $[\text{M}+\text{H}]^+$  calc: 323.1156, found: 323.1525; **TLC**  $R_f$  = 0.89 1:3 (Hexanes/EtOAc)

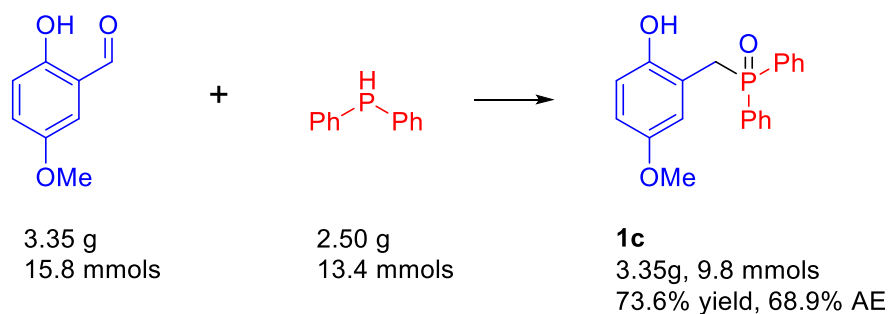

(2-Hydroxy-5-methoxybenzyl)diphenylphosphine oxide (**1c**): Prepared from 2 diphenylphosphine (2.5 g, 13.4 mmol, 1 equiv.) and 2-hydroxy-5-methoxybenzaldehyde (2.41 g, 15.8 mmol, 1.18 equiv.) concentrated *in vacuo* to give **1c** as a pale-yellow powder (3.35 g, 73.8%).  $^{31}\text{P}\{^1\text{H}\}$  NMR (162 MHz,  $\text{CDCl}_3$ )  $\delta_{\text{P}}$  37.97;  $^1\text{H}$  NMR (400 MHz,  $\text{CDCl}_3$ )  $\delta$  3.63

(s, 3H), 3.69 (d,  $J = 12.9$  Hz, 2H), 6.32 (t, 1H), 6.29 (dq,  $J = 8.9, 1.6$  Hz, 1H), 6.97 (d,  $J = 8.75$  Hz, 1H), 7.47 – 7.53 (m, 4H), 7.55 – 7.60 (m, 2H), 7.71 – 7.77 (m, 4H), 10.7 (s, 1H);  $^{13}\text{C}$  NMR (101 MHz,  $\text{CDCl}_3$ )  $\delta_{\text{C}}$  35.04 (d,  $J = 67.6$  Hz), 55.69 (s), 113.7 (d,  $J = 3.74$  Hz), 117.1 (d,  $J = 6.29$  Hz), 120.1 (d,  $J = 2.94$  Hz), 128.8 (d,  $J = 12.0$  Hz), 130.5 (d,  $J = 100.7$  Hz), 132.5 (d,  $J = 2.87$ ), 150.4 (s). **FTIR** (neat,  $\text{cm}^{-1}$ ): 3004, 2906, 1658, 1508, 1433, 1271, 1215, and 1164. **MS** (ESI)  $\text{C}_{20}\text{H}_{19}\text{O}_3\text{P}$   $[\text{M}+\text{H}]^+$  calc: 339.1105, found: 339.1505; **TLC**  $R_f = 0.4$  2:3 (Hexane/EtOAc)

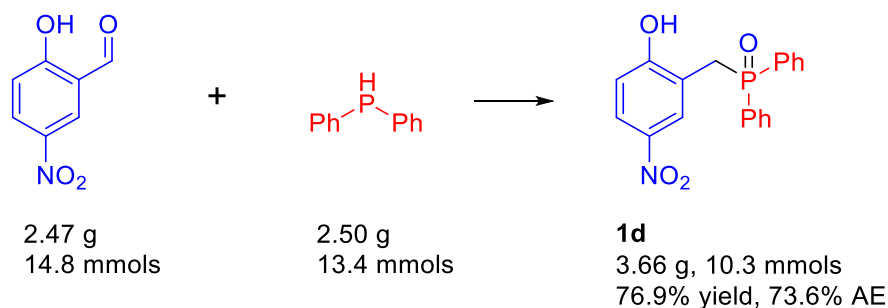

(2-Hydroxy-5-nitrobenzyl)diphenylphosphine oxide (**1d**): Prepared from diphenylphosphine (2.5 g, 13.4 mmol, 1 equiv.) and 2-hydroxy-5-nitrobenzaldehyde (2.47 g, 14.8 mmol, 1.10 equiv.) concentrated *in vacuo* to afford **1d** as a pale orange powder (3.66 g, 77.1%) Product was then characterized by  $^{31}\text{P}\{^1\text{H}\}$  NMR (162 MHz,  $\text{CDCl}_3$ )  $\delta_{\text{P}}$  36.37;  $^1\text{H}$  NMR (400 MHz,  $\text{CDCl}_3$ )  $\delta_{\text{H}}$  3.76 (d,  $J = 13.0$  Hz, 2H), 7.02 (d,  $J = 8.99$  Hz, 1H), 7.52 (m, 4H), 7.60 (m, 2H), 7.75 (m, 4H), 9.44 (s, 1H);  $^{13}\text{C}$  NMR (101 MHz,  $\text{CDCl}_3$ )  $\delta_{\text{C}}$  35.5 (d,  $J = 70.4$  Hz), 119.44 (s), 119.86 (d,  $J = 7.65$  Hz), 125.25 (s), 127.56 (d,  $J = 7.88$ ), 129.13 (d,  $J = 12.2$  Hz), 129.3 (d,  $J = 101.9$  Hz), 130.9 (d,  $J = 10.0$  Hz), 133.01 (d,  $J = 2.8$  Hz), 163.2 (d,  $J = 3.22$  Hz). **FTIR** (neat,  $\text{cm}^{-1}$ ): 3419, 3080, 2590, 1677, 1434, 1335, 1296, 1135, 1118. **MS** (ESI)  $\text{C}_{19}\text{H}_{16}\text{NO}_4\text{P}$   $[\text{M}+\text{H}]^+$  calc: 354.0850, found: 355.0884; **TLC**  $R_f = 0.53$  1:3 (Hexane/ EtOAc)

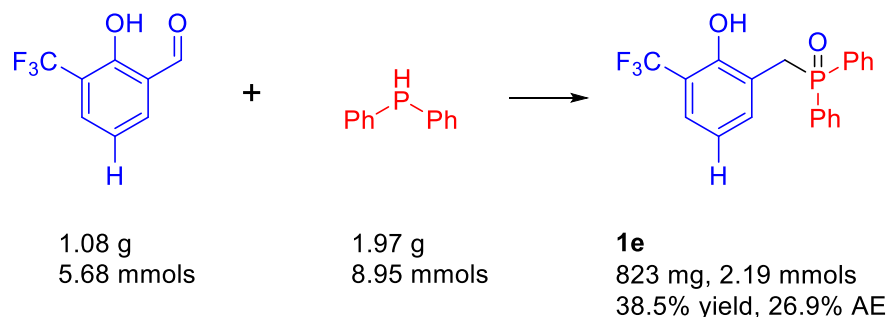

(3-Trifluoromethyl-2-hydroxybenzyl)diphenylphosphine oxide (**1e**): Prepared from diphenylphosphine (1.97 g, 8.95 mmol, 1 equiv.) and 3-trifluoromethyl-2-hydroxybenzaldehyde (1.08 g, 5.68 mmol, 0.635 equiv.) crystallized in ethanol and hexanes to afford opaque white crystals (823.3 mg, 38.5% yield.) Product was then characterized via:  $^{31}\text{P}\{^1\text{H}\}$  NMR (162 MHz,  $\text{CDCl}_3$ )  $\delta_{\text{P}}$  38.62;  $^1\text{H}$  NMR (400 MHz,  $\text{CDCl}_3$ )  $\delta_{\text{H}}$  3.76 (d,  $J = 13.0$  Hz, 2H), 6.68 (td,  $J = 7.9, 0.9$  Hz, 1H), 6.77 (dt,  $J = 7.7, 1.8$  Hz, 1H), 7.08 (dp,  $J = 7.8, 1.5$  Hz, 1H), 7.53 – 7.44 (m, 4H), 7.62 – 7.53 (m, 2H), 7.78 – 7.68 (m, 4H), 10.22 (s, 1H);  $^{13}\text{C}$  NMR (101 MHz,  $\text{CDCl}_3$ )  $\delta_{\text{C}}$  35.23 (d,  $J = 66.8$  Hz), 120.0 (d,  $J = 2.2$  Hz), 122.26 – 122.17 (m), 122.30 (d), 128.88 (d,  $J = 12.1$  Hz), 130.00 (d,  $J = 100.3$  Hz), 130.95 (d,  $J = 9.9$  Hz), 132.64 (d,  $J = 2.9$  Hz), 139.54 (dq,  $J = 3.4, 1.7$  Hz), 149.5 (d,  $J = 4.0$  Hz); **MS** (ESI)  $\text{C}_{20}\text{H}_{16}\text{F}_3\text{O}_2\text{P}$   $[\text{M}+\text{H}_3\text{O}]^+$  calc: 395.0970, found: 394.8967; **FTIR** (neat,  $\text{cm}^{-1}$ ): 2911.5, 1606.9, 1485.5, 1470.0, 1436.0, 1398.0, 1333.9, 1271.8, 1237.7, 1230.8, 1206.7, 1162.1, 1144.6, 1120.2, 1100.6, 1070.1, 1028.1.



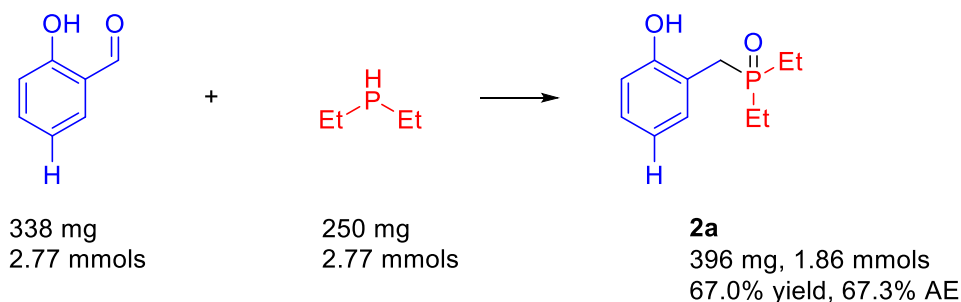

(2-Hydroxybenzyl)diethylphosphine oxide (**2a**): Prepared from diethylphosphine (250 mg, 2.77 mmol, 1 equiv.) and 2-hydroxybenzaldehyde (338 mg, 2.77 mmol, 1.00 equiv.) which was crystallized by layering DCM and Hexanes to afford clear, colorless crystals (396 mg, 67%). Product was then characterized and found to be in agreement with previously reported literature.  $^{31}\text{P}\{^1\text{H}\}$  NMR (162 MHz,  $\text{CDCl}_3$ )  $\delta_{\text{P}}$  58.49;  $^1\text{H}$  NMR (400 MHz,  $\text{CDCl}_3$ )  $\delta_{\text{H}}$  1.16 (dt,  $J$  = 16.1, 7.7 Hz, 6H), 1.77 (dq,  $J$  = 11.9, 7.6, 4.6 Hz, 4H), 3.17 (d,  $J$  = 12.9 Hz, 2H), 6.82 (t,  $J$  = 7.4 Hz, 1H), 6.98 (d,  $J$  = 8.0 Hz, 1H), 7.02 (d,  $J$  = 7.5 Hz, 1H), 7.14 (t,  $J$  = 7.8 Hz, 1H), 9.90 (s, 1H). ;  $^{13}\text{C}$  NMR (101 MHz,  $\text{CDCl}_3$ )  $\delta_{\text{C}}$  5.65 (d,  $J$  = 4.9 Hz), 19.52 (d,  $J$  = 65.6 Hz), 31.27 (d,  $J$  = 61.2 Hz), 118.65 (d,  $J$  = 2.3 Hz), 119.38 (d,  $J$  = 7.9 Hz), 120.42 (d,  $J$  = 1.8 Hz), 128.82 (d,  $J$  = 2.7 Hz), 131.08 (d,  $J$  = 5.7 Hz), 156.12 (d,  $J$  = 4.0 Hz). FTIR (neat,  $\text{cm}^{-1}$ ): 3040, 2975, 2711, 2596, 1594, 1455, 1246, 1107. MS (ESI)  $\text{C}_{11}\text{H}_{17}\text{O}_2\text{P}$   $[\text{M}+\text{H}]^+$  calc: 213.1000, found: 213.1277; TLC  $R_{\text{f}}$  = 0.73 4:1 (MeOH/DCM)

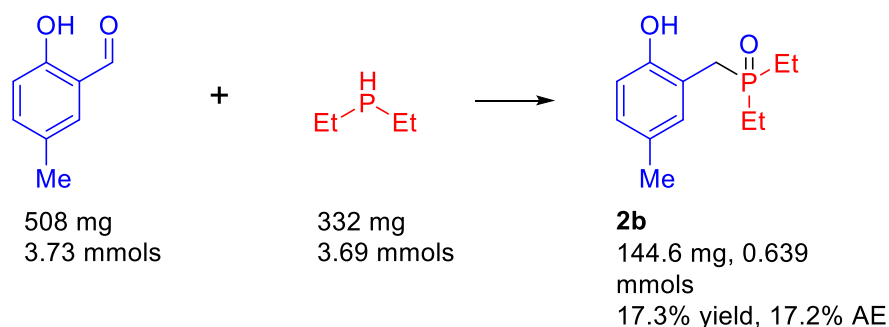

(2-Hydroxy-5-methylbenzyl)diethylphosphine oxide (**2b**): Prepared from diethylphosphine (332 mg, 3.69 mmol, 1 equiv.) and 2-hydroxy-5-methylbenzaldehyde (508 mg, 3.73 mmol, 1.01 equiv.) was crystallized by layering ethanol and hexanes to afford translucent white crystals (144.6 mg 17.3%).  $^{31}\text{P}\{^1\text{H}\}$  NMR (162 MHz,  $\text{CDCl}_3$ )  $\delta_{\text{P}}$  58.03;  $^1\text{H}$  NMR (400 MHz,  $\text{CDCl}_3$ )  $\delta_{\text{H}}$  1.16 (dt,  $J$  = 16.9, 7.7 Hz, 6H), 1.76 (dq,  $J$  = 11.7, 7.6, 3.0 Hz, 4H), 2.23 (s, 3H), 3.11 (d,  $J$  = 12.6 Hz, 2H), 6.81 (d, 1H), 6.86 (d,  $J$  = 8.2 Hz, 1H), 6.94 (d,  $J$  = 8.2, 2.6, 1.9, 0.8 Hz, 1H), 9.51 (s, 1H);  $^{13}\text{C}$  NMR (101 MHz,  $\text{CDCl}_3$ )  $\delta_{\text{C}}$  5.67 (d,  $J$  = 4.8 Hz), 19.55 (d,  $J$  = 65.7 Hz), 20.44 (s), 31.45 (d,  $J$  = 61.2 Hz), 118.61 (d,  $J$  = 2.4 Hz), 119.19 (d,  $J$  = 8.1 Hz), 129.32 (d), 129.56 (d,  $J$  = 1.9 Hz), 131.49 (d,  $J$  = 5.9 Hz), 153.77 (d); MS (ESI)  $\text{C}_{12}\text{H}_{19}\text{O}_2\text{P}$   $[\text{M}+\text{H}]^+$  calc: 227.1156, found: 227.4686; FTIR (neat,  $\text{cm}^{-1}$ ): 2976, 2940, 2910, 2881, 2721, 1684, 1607, 1513, 1455, 1431, 1400, 1371, 1268, 1243, 1211, 1226, 1146, 1111, 1096, 1942, 1019.

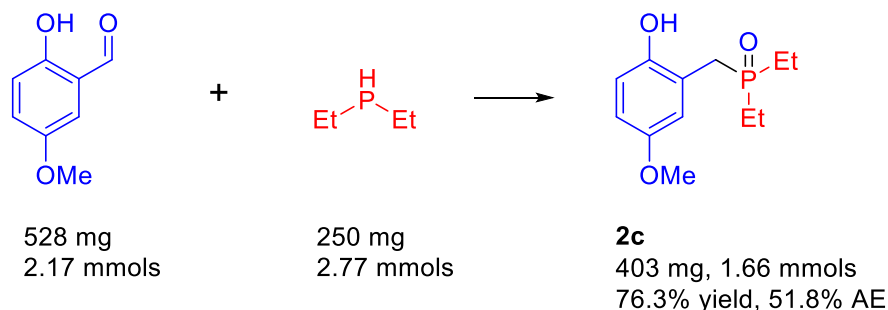

(2-Hydroxy-5-methoxybenzyl)diethylphosphine oxide (**2c**): Prepared from diethylphosphine (250 mg, 3.47 mmol, 1 equiv.) and 2-hydroxy-5-methoxybenzaldehyde (528 mg, 2.17 mmol, 1.25 equiv.) was crystallized by layering DCM and hexanes to afford opaque golden crystals (403 mg, 76.3%).  $^{31}\text{P}\{^1\text{H}\}$  NMR (162 MHz,  $\text{CDCl}_3$ )  $\delta_{\text{P}}$  58.56;  $^1\text{H}$  NMR (400 MHz,  $\text{CDCl}_3$ )  $\delta_{\text{H}}$  1.13 – 1.25 (m, 6H), 1.75 – 1.87 (m, 4H), 3.13 (d,  $J$  = 11.9 Hz, 2H), 3.78 (d,  $J$  = 1.3 Hz, 3H), 6.56 (s, 1H), 6.74 – 6.79 (m, 1H), 6.97 (d,  $J$  = 8.8 Hz, 1H), 9.28 (s, 1H);  $^{13}\text{C}$  NMR (101 MHz,  $\text{CDCl}_3$ )  $\delta_{\text{C}}$  5.73 (d,  $J$  = 4.7 Hz), 19.62 (d,  $J$  = 65.7 Hz), 32.20 (d,  $J$  = 60.8 Hz), 55.72, 113.22 (d,  $J$  = 2.7 Hz), 116.80 (d,  $J$  = 6.0 Hz), 120.33 (d,  $J$  = 2.4 Hz), 120.90 (d,  $J$  = 8.5 Hz), 150.15 (d,  $J$  = 3.8 Hz), 153.50 (d,  $J$  = 1.7 Hz). FTIR (neat,  $\text{cm}^{-1}$ ): 2947, 2584, 2068, 1863, 1510, 1432, 1213, 1113, 1034. MS (ESI)  $\text{C}_{12}\text{H}_{19}\text{O}_3\text{P}$   $[\text{M}+\text{H}]^+$  calc: 243.1105, found: 243.1412; TLC  $R_{\text{f}}$  = 0.59 4:1 (MeOH/DCM)

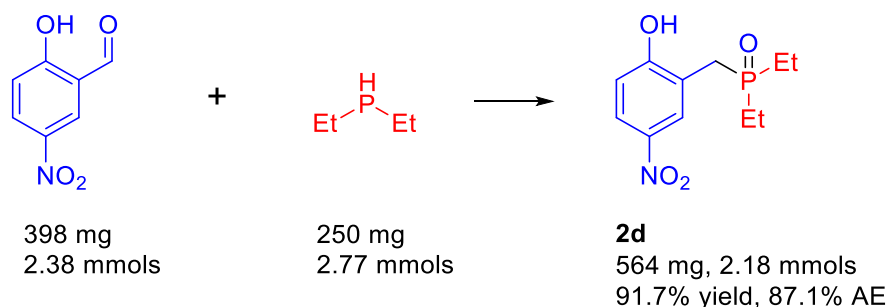

(2-Hydroxy-5-nitrobenzyl)diethylphosphine oxide (**2d**): Prepared from diethylphosphine (250 mg, 2.77 mmol, 1.16 equiv.) and 2-hydroxy-5-nitrobenzaldehyde (398 mg, 2.38 mmol, 1 equiv.) was crystallized by layering DCM and hexanes to afford a pale yellow powder (564 mg, 91.7%).  $^{31}\text{P}\{^1\text{H}\}$  NMR (162 MHz,  $\text{CDCl}_3$ )  $\delta_{\text{P}}$  61.63;  $^1\text{H}$  NMR (400 MHz,  $\text{CDCl}_3$ )  $\delta_{\text{H}}$  1.21 (dt,  $J$  = 17.6, 7.7 Hz, 6H), 1.91 (dq,  $J$  = 12.1, 7.7 Hz, 4H), 3.28 (d,  $J$  = 12.3 Hz, 2H), 7.02 (d,  $J$  = 8.9 Hz, 1H), 8.00 (t,  $J$  = 2.3 Hz, 1H), 8.07 (d,  $J$  = 8.7 Hz, 1H), 10.00 (s, 1H);  $^{13}\text{C}$  NMR (101 MHz,  $\text{CDCl}_3$ )  $\delta_{\text{C}}$  9.84, 19.45 (d,  $J$  = 65.5 Hz), 27.15, 125.45, 127.14, 118.80, 119.49, 141.10, 158.61. FTIR (neat,  $\text{cm}^{-1}$ ): 2947, 2737, 2584, 1863, 1746, 1510, 1432, 1213, 1157, 1092. MS (ESI)  $\text{C}_{11}\text{H}_{16}\text{NO}_4\text{P}$   $[\text{M}+\text{H}]^+$  calc: 258.0850, found: 258.1181; TLC  $R_{\text{f}}$  = 0.76 1:3 (Hexane/EtOAc)

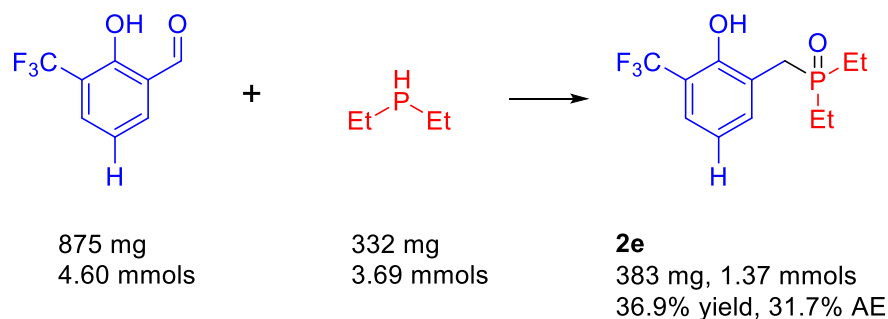

(3-Trifluoromethyl-2-hydroxybenzyl)diethylphosphine oxide (**2d**): Prepared from diethylphosphine (332 mg, 3.69 mmol, 1.00 equiv.) and 3-trifluoromethyl-2-hydroxybenzaldehyde (875 mg, 4.60 mmol, 1.25 equiv.) was purified by flash column chromatography (100% EtOAc) and concentrated *in vacuo* to afford a golden transparent wax-like substrate (383 mg, 36.9%). <sup>31</sup>P{<sup>1</sup>H} NMR (162 MHz, CDCl<sub>3</sub>) δ<sub>P</sub> 58.76; <sup>1</sup>H NMR (400 MHz, CDCl<sub>3</sub>) δ<sub>H</sub> 1.11 (dt, J = 17.0, 7.7 Hz, 6H), 1.74 (dq, J = 12.0, 7.7 Hz, 4H), 3.17 (d, J = 12.5 Hz, 2H), 6.78 (t, J = 7.9 Hz, 1H), 6.96 (dt, J = 7.7, 1.7 Hz, 1H), 7.09 (dq, J = 8.3, 1.6 Hz, 1H), 10.15 (s, 1H); <sup>13</sup>C NMR (101 MHz, CDCl<sub>3</sub>) δ<sub>C</sub> 5.40 (d, J = 5.0 Hz), 19.55 (d, J = 66.0 Hz), 31.47 (d, J = 60.3 Hz), 120.03 (d, J = 1.9 Hz), 120.74 (d, J = 256.8 Hz), 121.98 (dd, J = 2.4, 1.1 Hz), 122.68 (d, J = 8.3 Hz), 129.60 (d), 139.27 (dd, J = 2.8, 1.7 Hz), 149.13 (d, J = 3.7 Hz); **MS** (ESI) C<sub>12</sub>H<sub>16</sub>F<sub>3</sub>O<sub>2</sub>P [M+H<sub>3</sub>O]<sup>+</sup> calc: 299.0979, found: 299.15408; **FTIR** (neat, cm<sup>-1</sup>): 2976.0, 1606.5, 1489.5, 1473.7, 1408.0, 1265.6, 1209.8, 1168.5, 1118.4, 1043.3.

### Large Scale Preparation of (2-hydroxybenzyl)diphenylphosphine oxide (**1a**):

Run #1 (Table S1 reaction # 2): Diphenylphosphine (9.82 g, 52.8 mmol, 1 equiv.), salicylaldehyde (6.57 g, 53.8 mmol, 1.02 equiv.), and trifluoroacetic acid (14.2 g) were combined in a nitrogen-flushed, heavy-walled 100 mL borosilicate spherical flask equipped with a Teflon valve and Teflon-coated stir bar. The mixture was stirred in an 80 °C oil bath for 24 h, then, without removing from heat, roughly half of the trifluoroacetic acid was distilled into a liquid nitrogen-cooled receiving flask under reduced pressure (5.03 g recovered and subjected to purity analysis and reuse as solvent for synthesis of **1a**, see Run #3). At this point, ethanol (23.7 g) was added, and the resulting powdery solid was isolated (16.4 g) and was found to be 80.1% **1a** by mass (42.6 mmol, 80.8 % yield), with the remainder comprised primarily of trifluoroacetic acid, salicylaldehyde, and diphenylphosphine oxide.

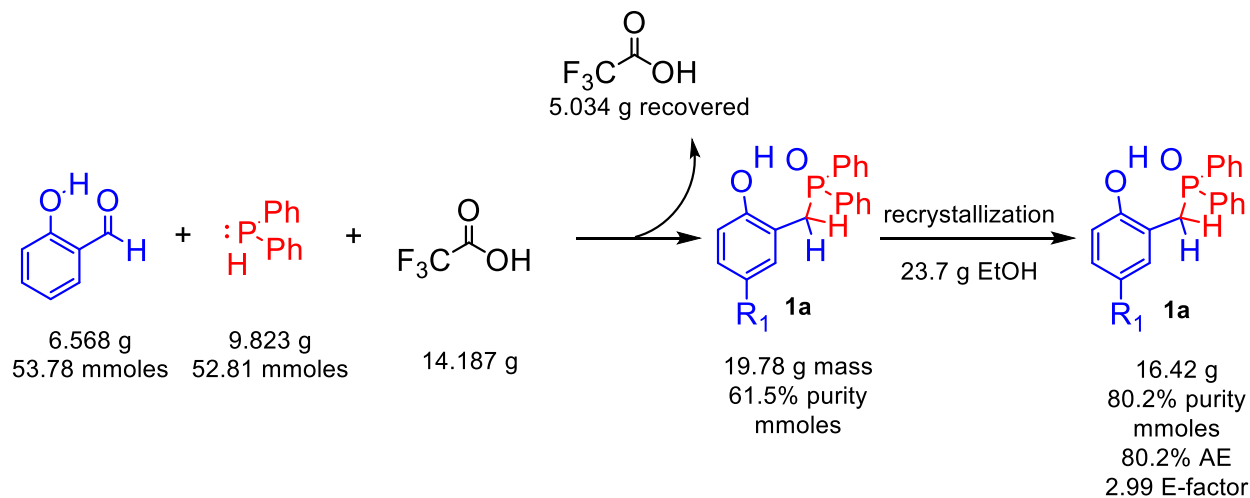

Run #2 (Table S1 reaction # 3): Diphenylphosphine (7.431 g, 39.91 mmol, 1.009 equiv.), salicylaldehyde (4.828 g, 39.54, 1 equiv.), and trifluoroacetic acid (15.166 g) were combined in a nitrogen-flushed, heavy-walled 100 mL borosilicate spherical flask equipped with a Teflon valve and Teflon-coated stir bar. The mixture was stirred in an 80 °C oil bath for 24 h, then, without removing from heat, roughly half of the trifluoroacetic acid was distilled into a liquid nitrogen-cooled receiving flask under reduced pressure (6.582 g recovered and subjected to purity analysis and reused as solvent for synthesis of **1a**, see below). At this point, toluene (7.98 g) was added, and the combined volatiles were distilled under reduced pressure (still at 80 °C). The resulting waxy solid (15.65 g) was found to be 63.4

% **1a** by mass (33.66 mmol, 85.1 % yield, 84.6 % AE), with the remainder comprised primarily of toluene, salicylaldehyde, and diphenylphosphine oxide. The solid was dissolved in refluxing ethanol (36.5 g), and allowed to cool slowly to 20 °C, after which it was cooled to 8 °C overnight. The supernatant mother liquor was then removed, and the crystalline solid was rinsed once with cold ethanol (7.00 g), and dried under reduced pressure, yielding **1a** (6.65 g) in 98.3% purity.

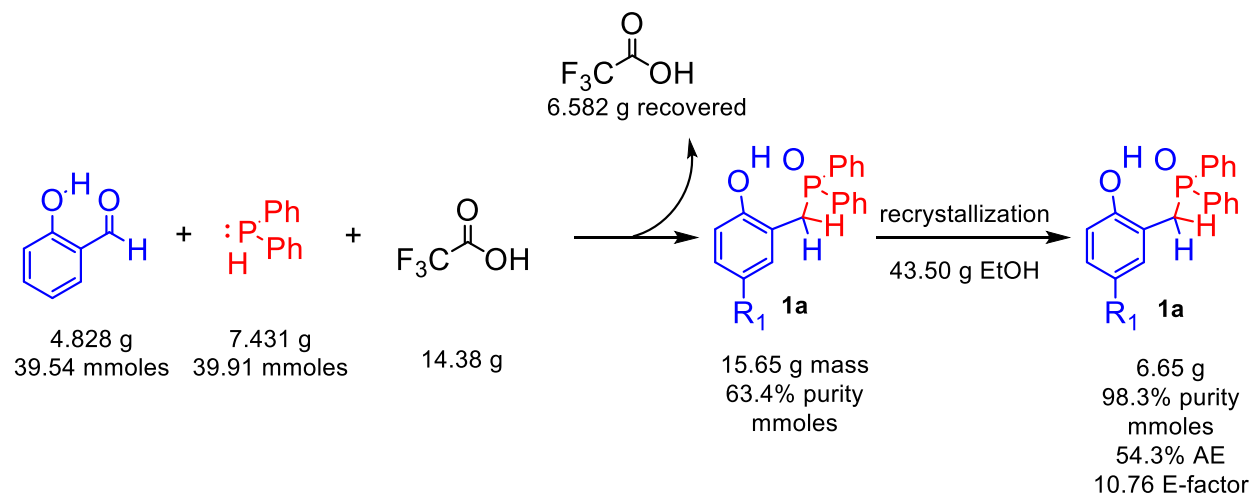

Run #3 (Table S1 reaction # 4): Reclaimed TFA was used to prepare “Beddoe’s Catalyst” (**1a**) consisted of 1.00 equivalents of diphenylphosphine (1.73 g, 9.32 mmol) and 1.02 equivalents of 2-hydroxybenzaldehyde (1.16 g, 9.5 mmol). Product was worked up with sodium bicarbonate and DCM and crystallized from EtOH to afford pale white crystals for 2.81 g with 85.6% purity.

**Figure S1.** Photographs of 50 mmol reaction setup and distillation setup. A = crude reaction mixture; B = mineral oil hot bath; C = short path distillation head with 10 °C water circulating; D = TFA receiving flask, cooled with liquid nitrogen; E = bump trap; F = corrosive-resistant diaphragm pump.

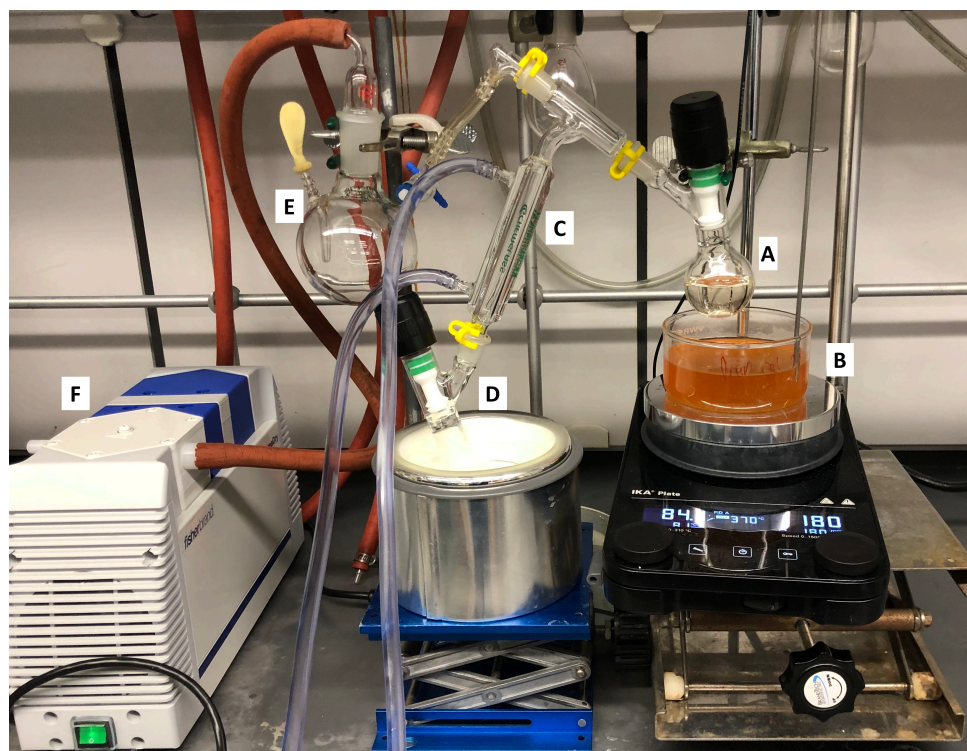

**Table S1.** Summary of multiple syntheses of **1a**.

| Reaction #                | 1      | 2      | 3      | 4      |
|---------------------------|--------|--------|--------|--------|
| Yield (mmol)              | 11.9   | 42.6   | 33.7   | 7.8    |
| % Yield                   | 89.0 % | 80.8 % | 85.1 % | 83.4 % |
| Atom Economy <sup>1</sup> | 85.9 % | 80.1 % | 84.6 % | 83.2 % |
| E-factor <sup>2</sup>     | N/A    | N/A    | 10.8   | N/A    |
| Purity <sup>2,3</sup>     | N/A    | N/A    | 98.3 % | N/A    |

<sup>1</sup> Based on crude yield. <sup>2</sup> After recrystallization from ethanol. <sup>3</sup> Based on <sup>1</sup>H NMR integration compared to internal standard.

## Spectral Gallery

$^1\text{H}$  NMR spectrum of **1b**

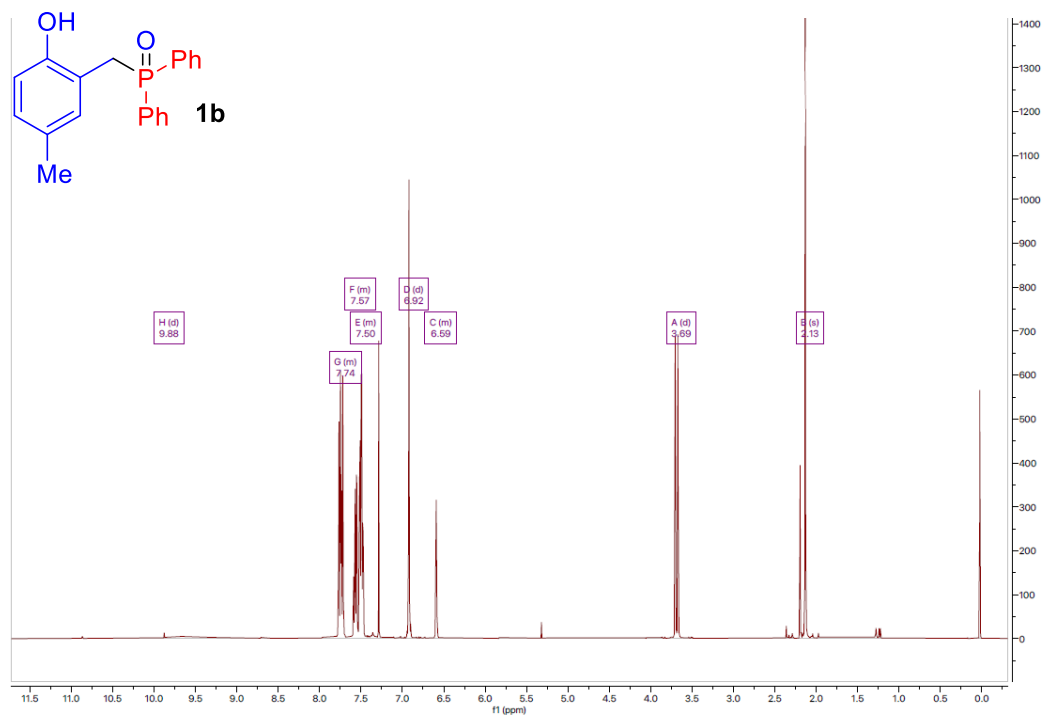

$^{13}\text{C}$  NMR spectrum of **1b**

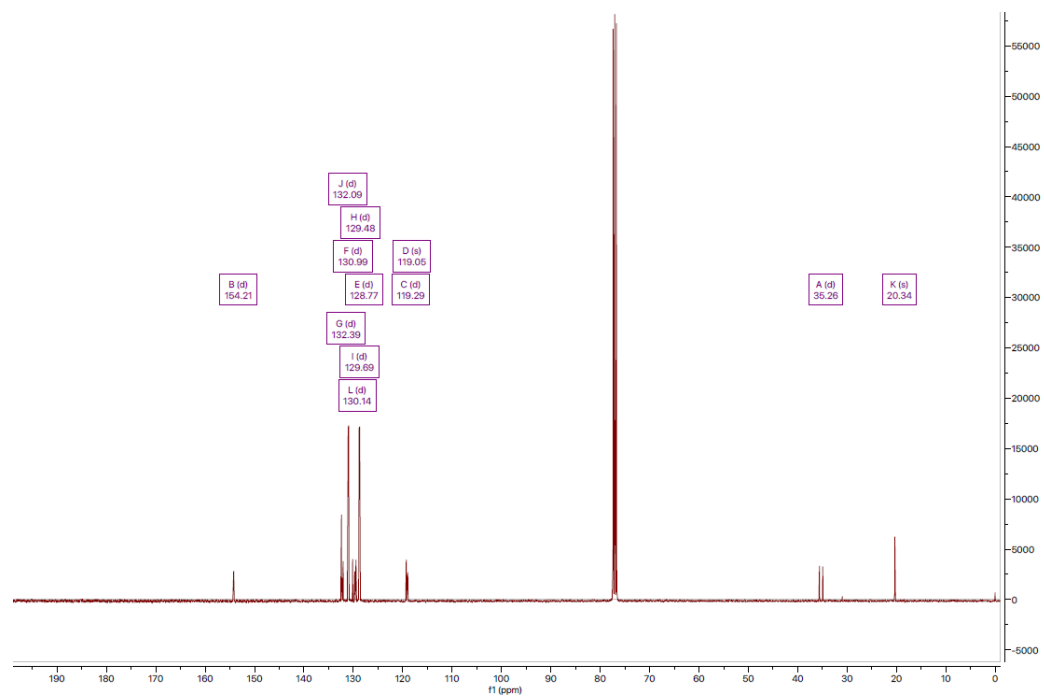

$^{31}\text{P}\{^1\text{H}\}$  NMR spectrum of **1b**

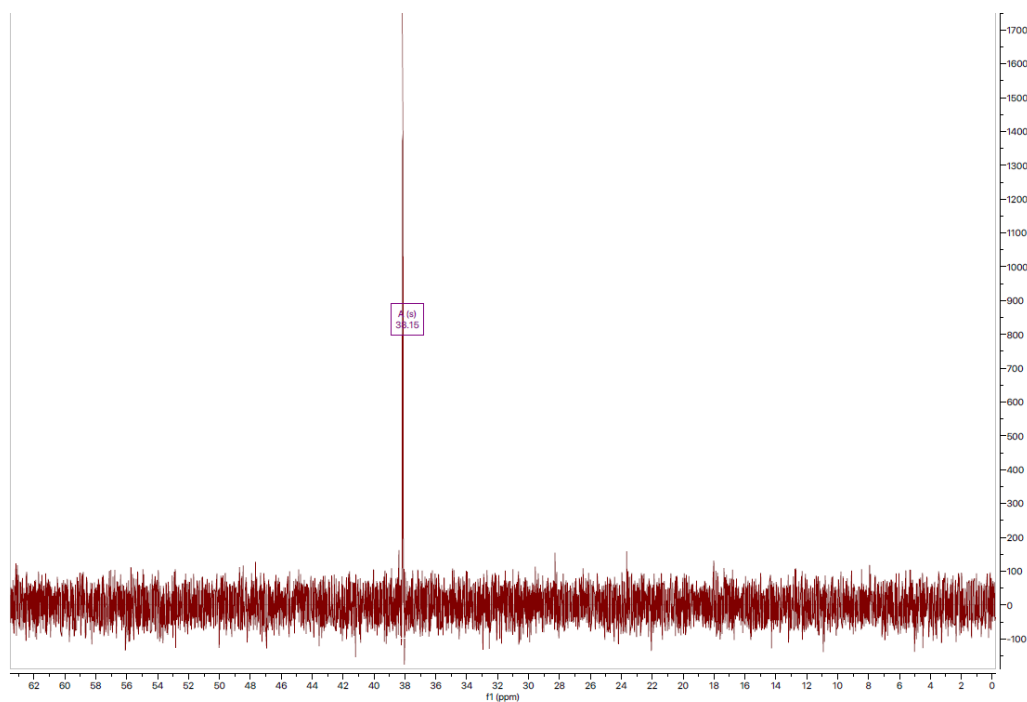

IR spectrum of **1b**

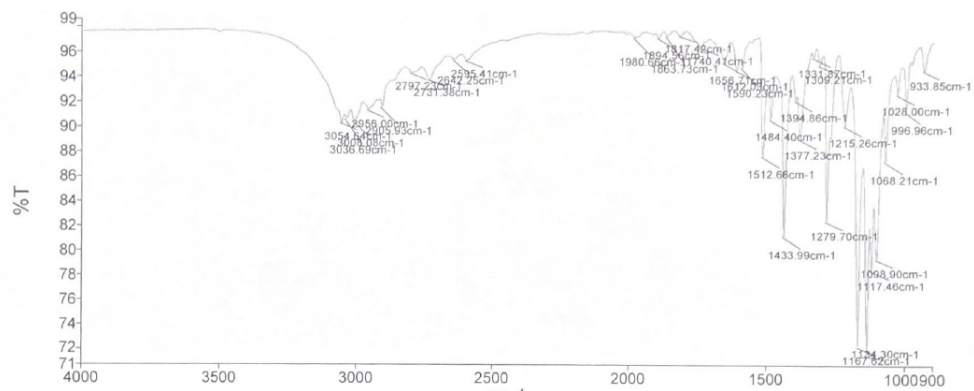

MS of **1b**

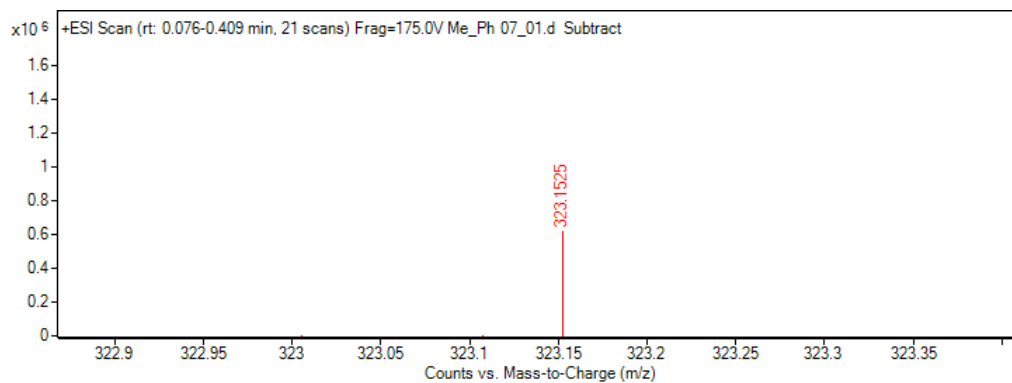

<sup>1</sup>H NMR spectrum of **1c**

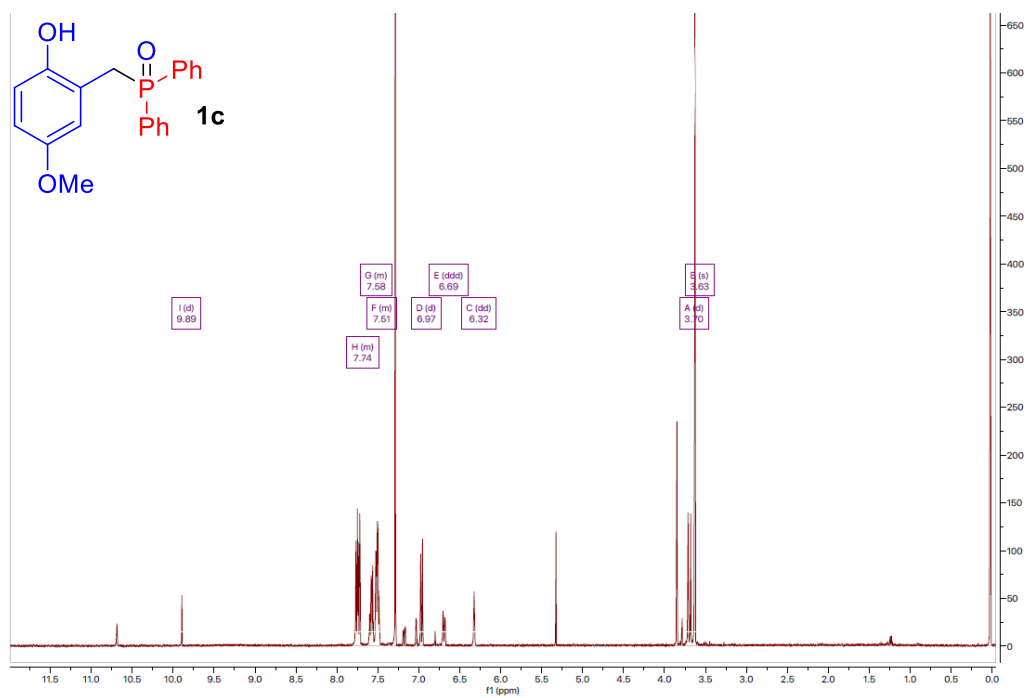

<sup>13</sup>C NMR spectrum of **1c**

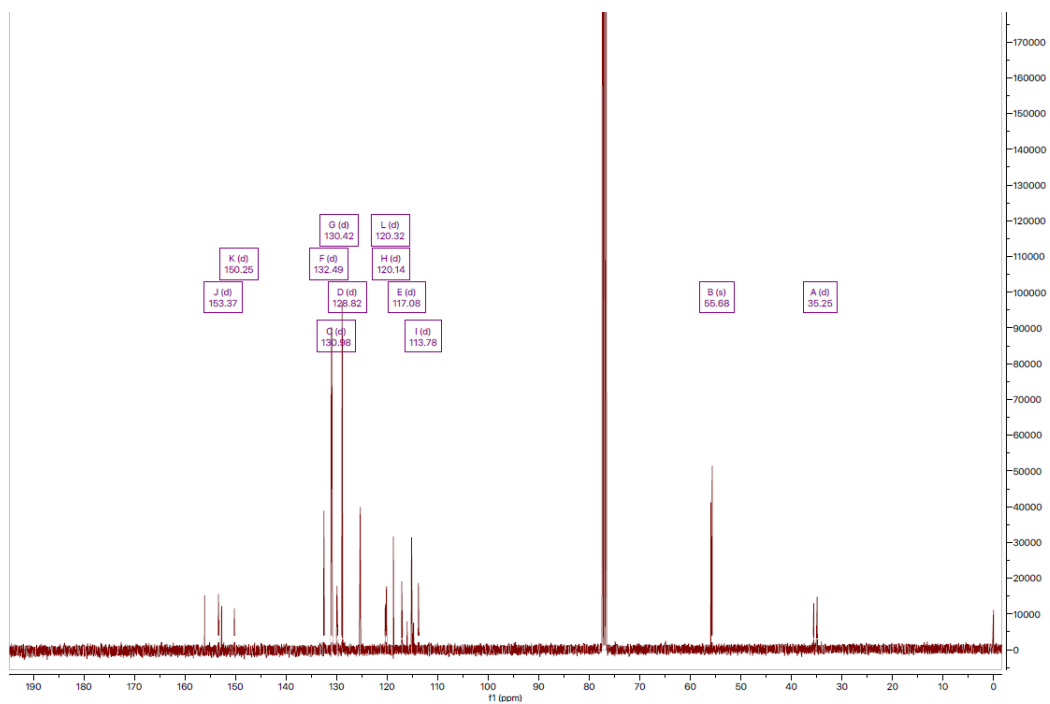



$^{31}\text{P}\{^1\text{H}\}$  NMR spectrum of **1c**

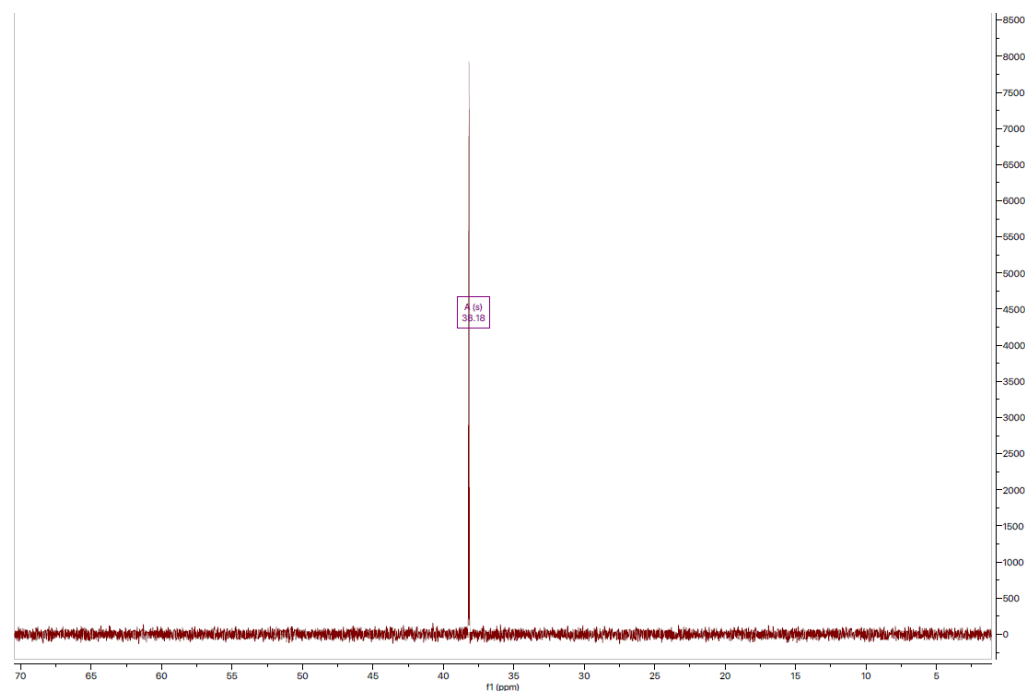

IR spectrum of **1c**

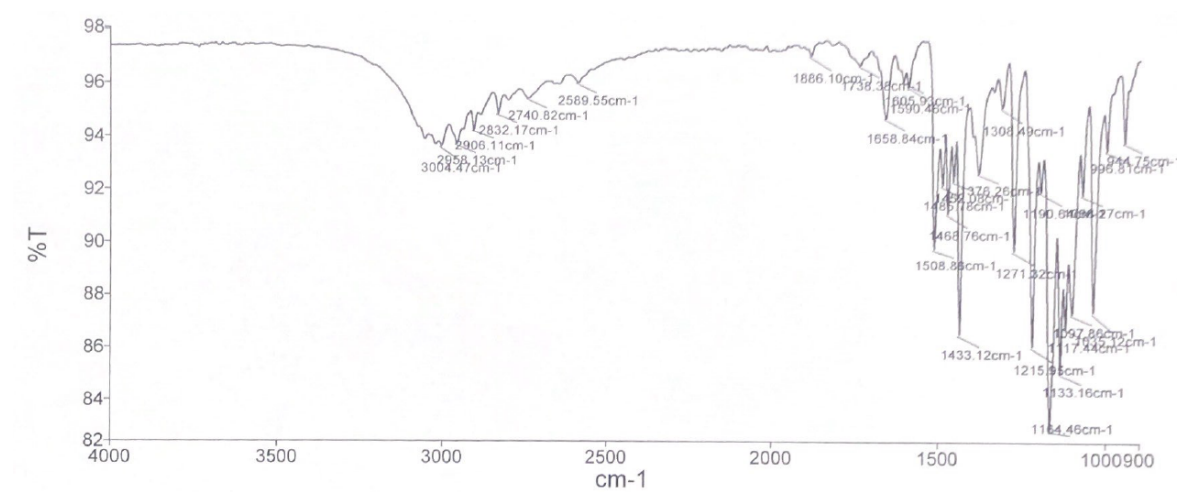

MS of **1c**

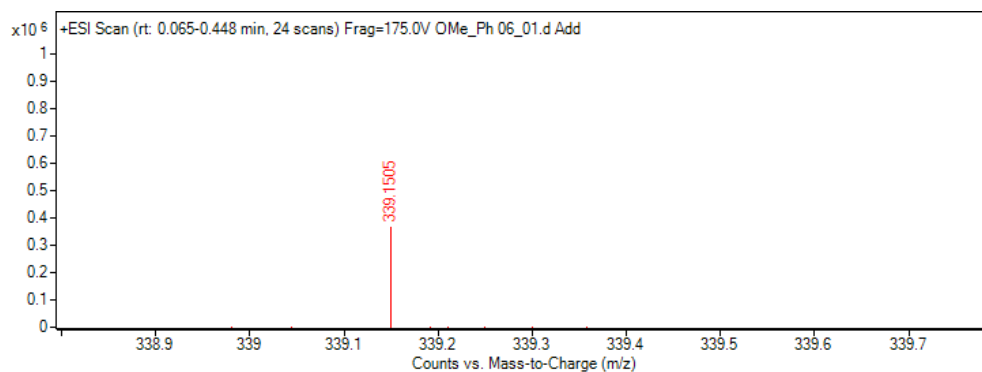

<sup>1</sup>H NMR spectrum of **1d**

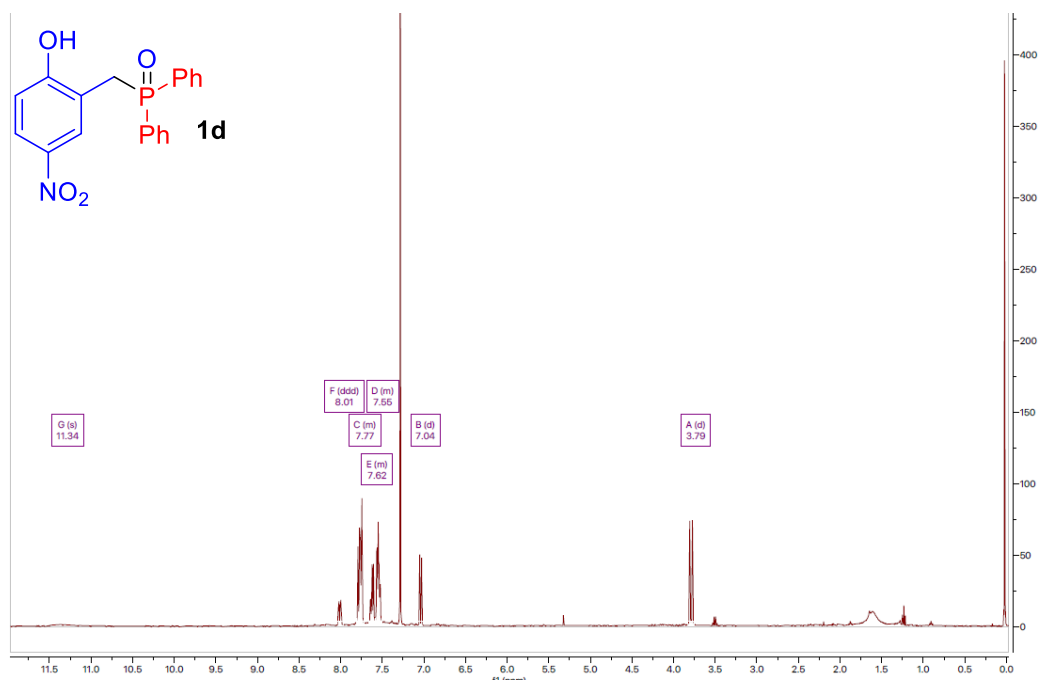

<sup>13</sup>C NMR spectrum of **1d**

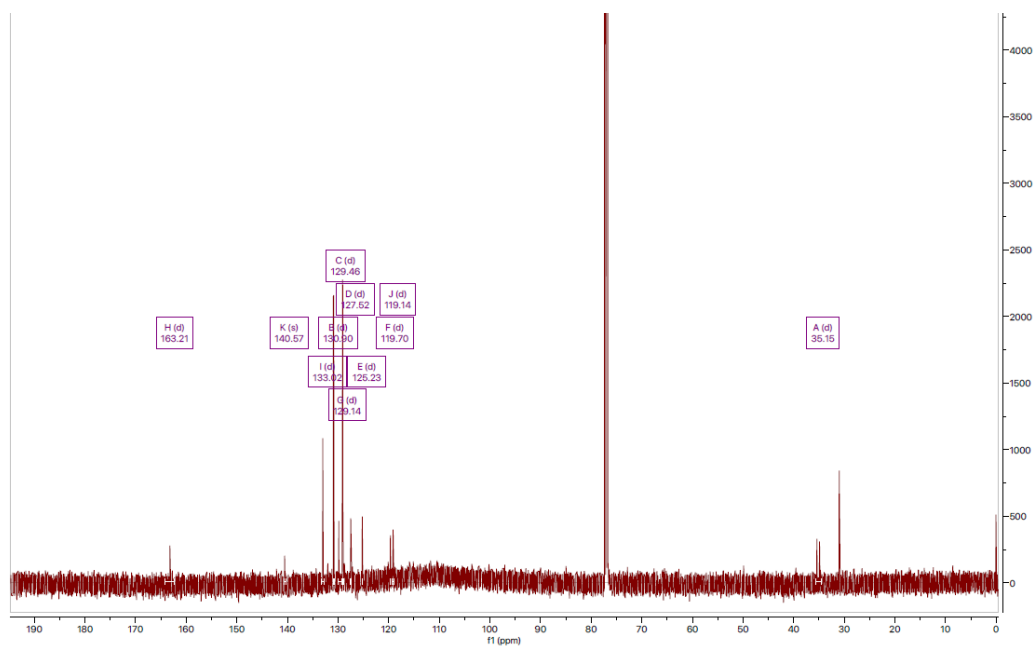

$^{31}\text{P}\{^1\text{H}\}$  NMR spectrum of **1d**

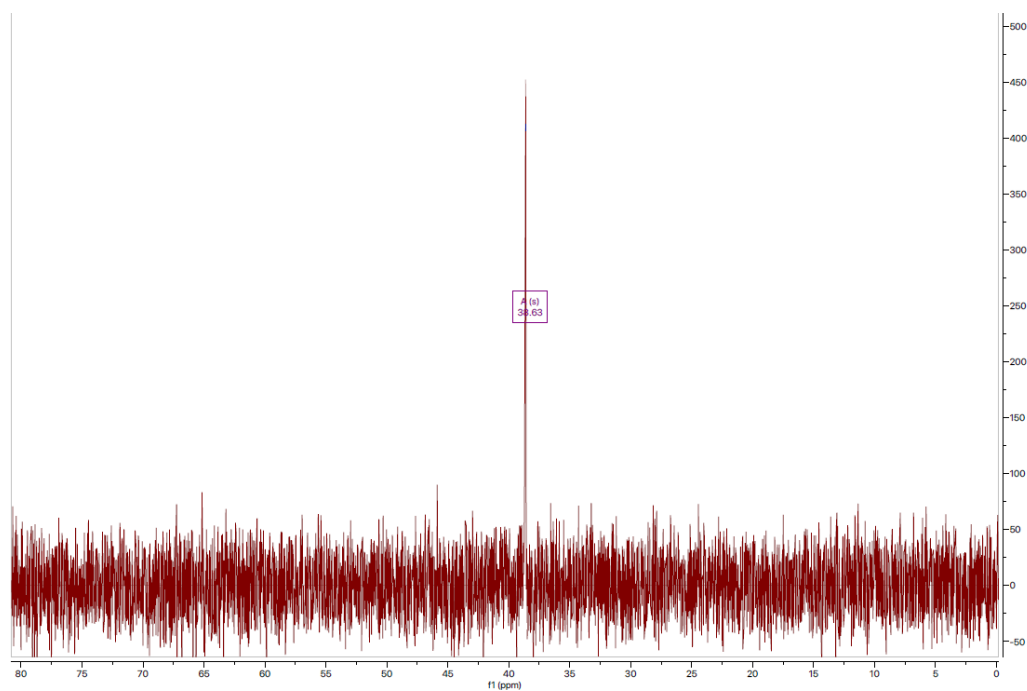

IR spectrum of **1d**

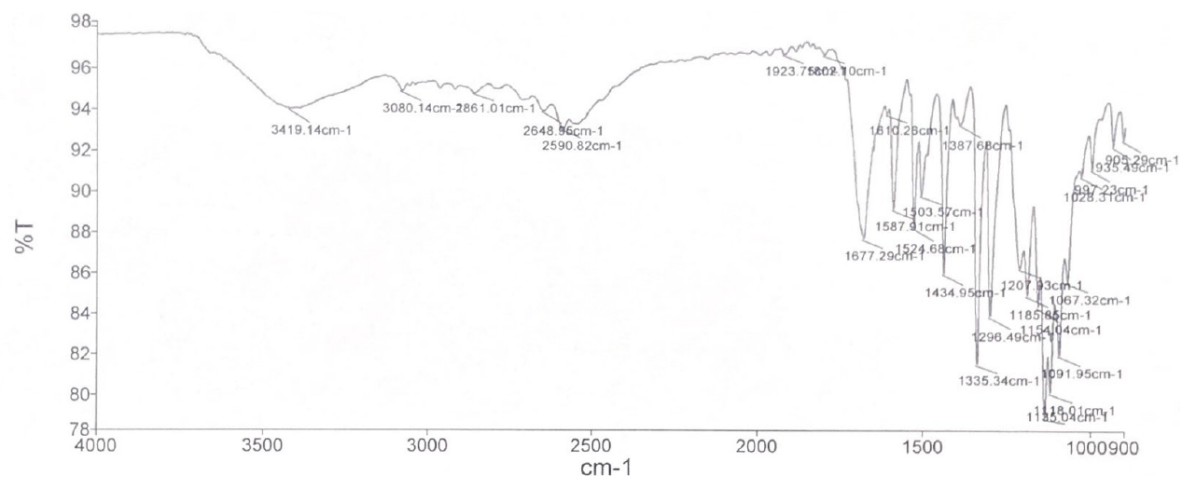

MS of **1d**

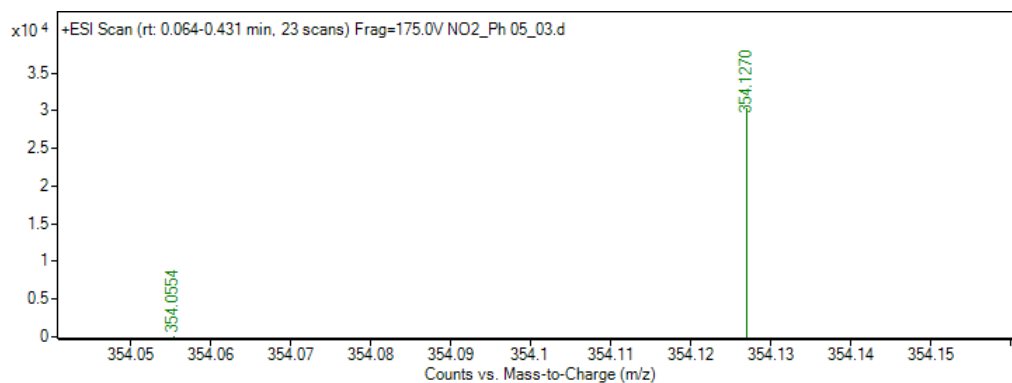

# <sup>1</sup>H NMR Spectrum of **1e**

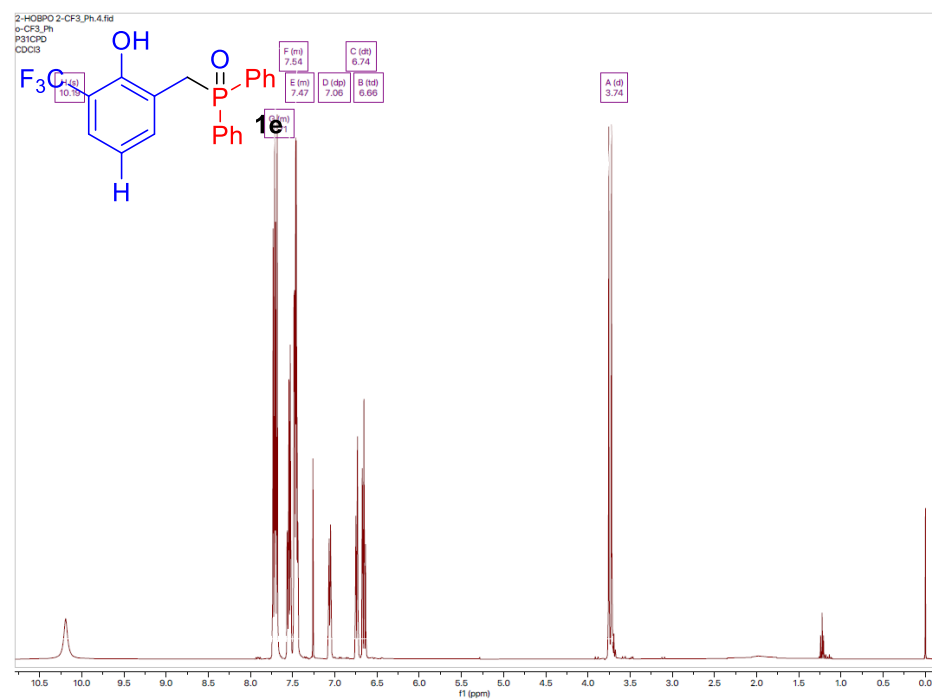

# <sup>13</sup>C CPD NMR Spectrum of **1e**

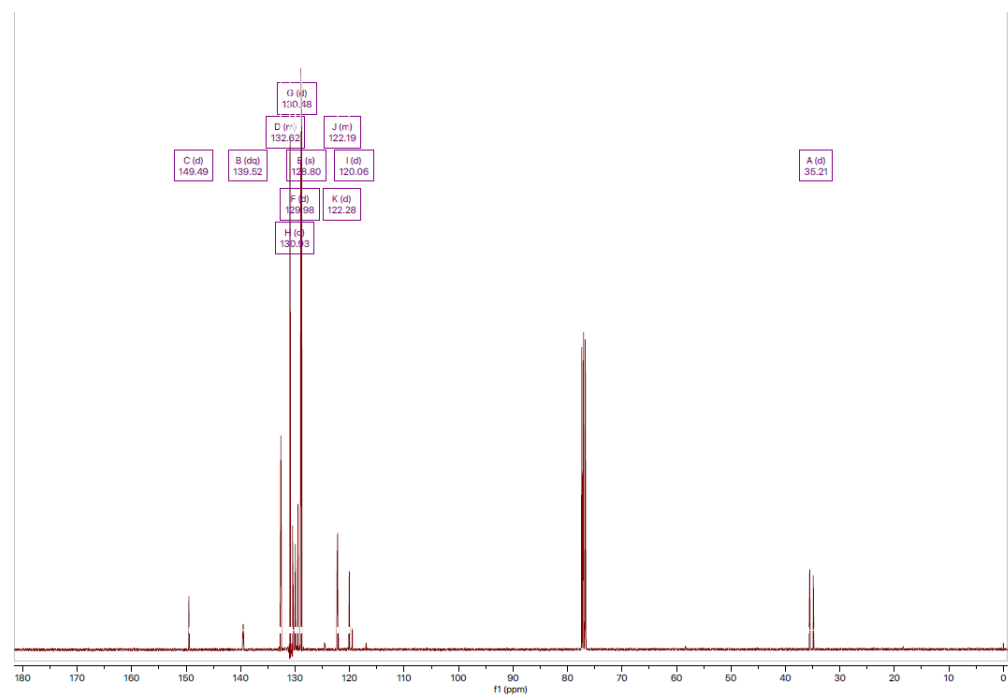

$^{31}\text{P}\{^1\text{H}\}$  NMR Spectrum of **1e**

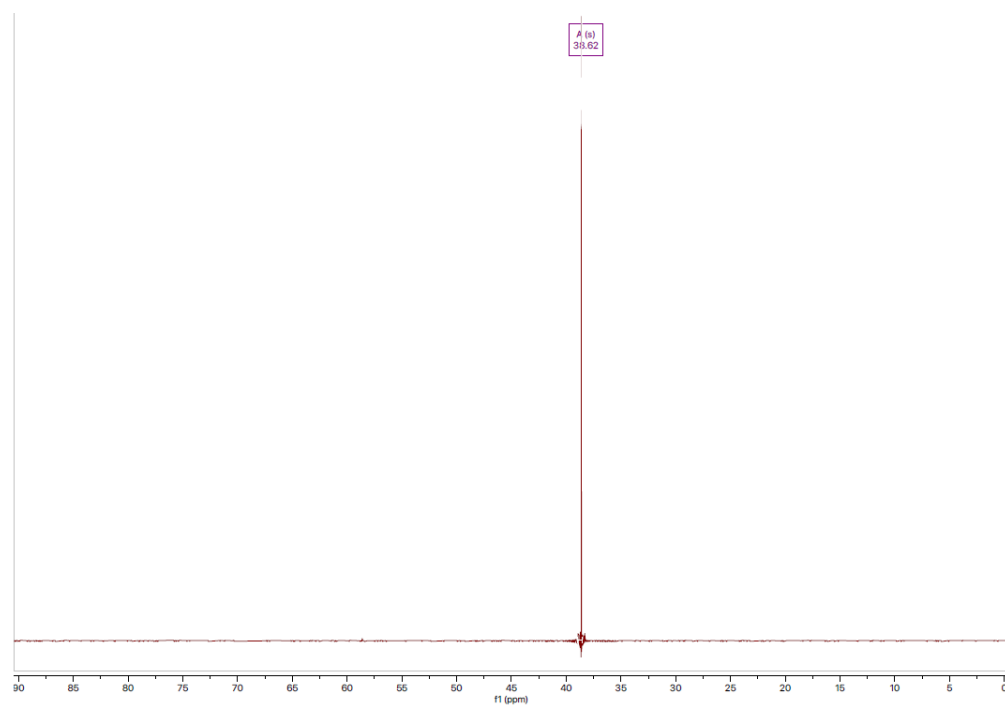

$^{19}\text{F}\{^1\text{H}\}$  NMR Spectrum of **1e**

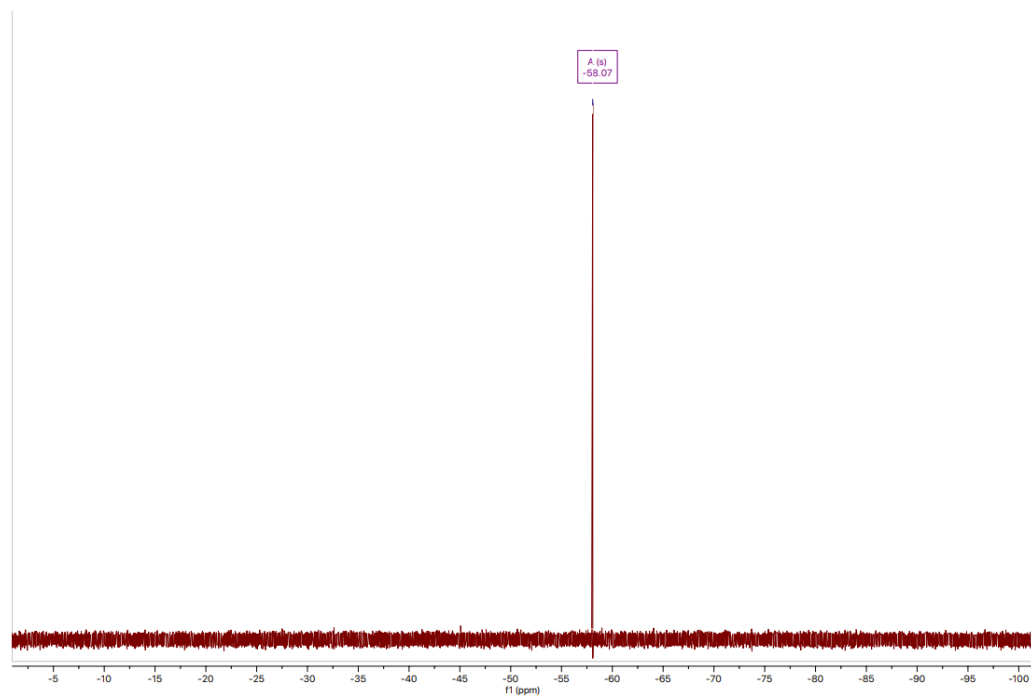

# IR Spectrum of 1e

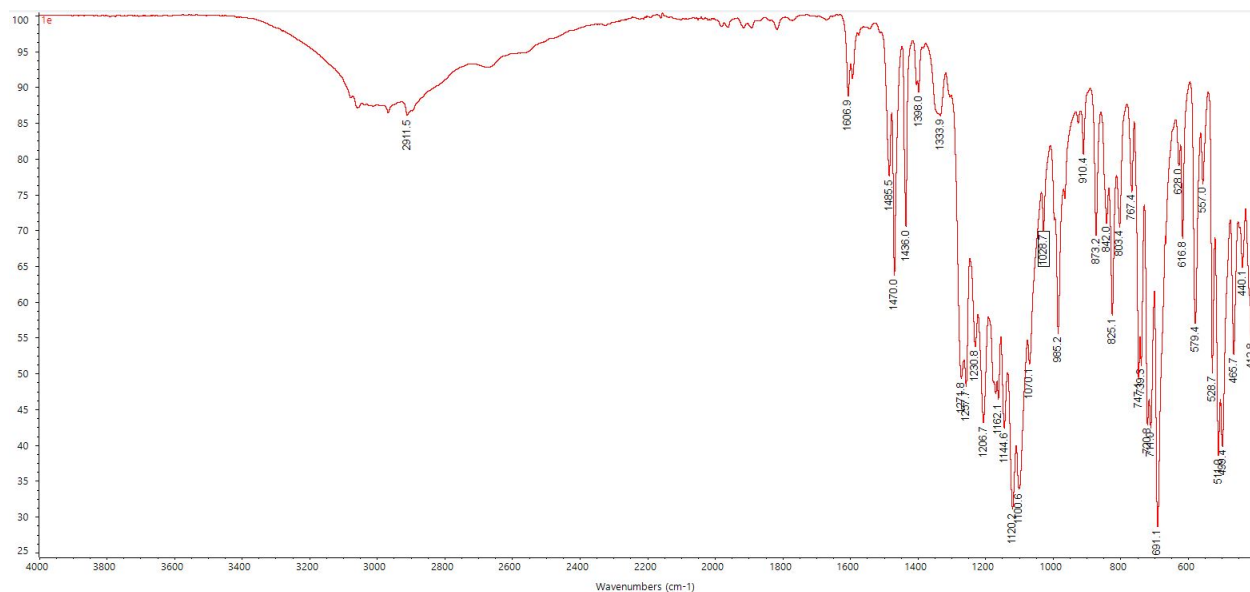

# MS of 1e

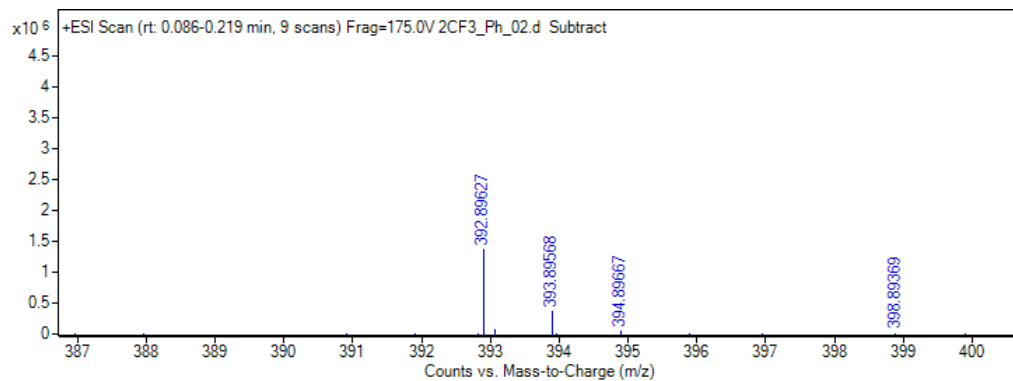

<sup>1</sup>H Spectrum of **2b**

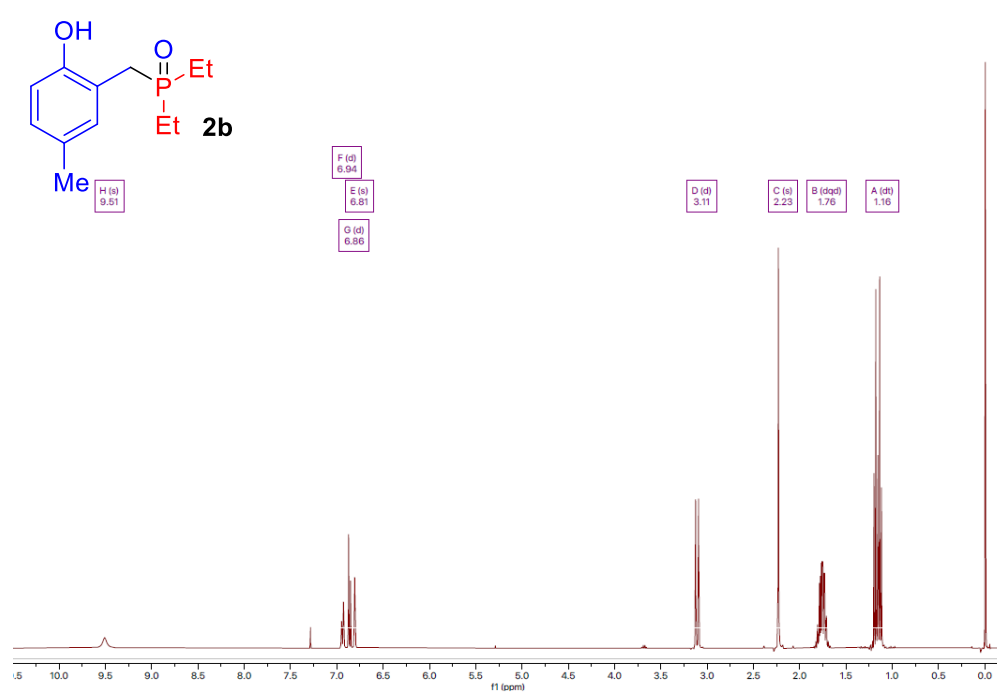

<sup>13</sup>C NMR Spectrum of **2b**

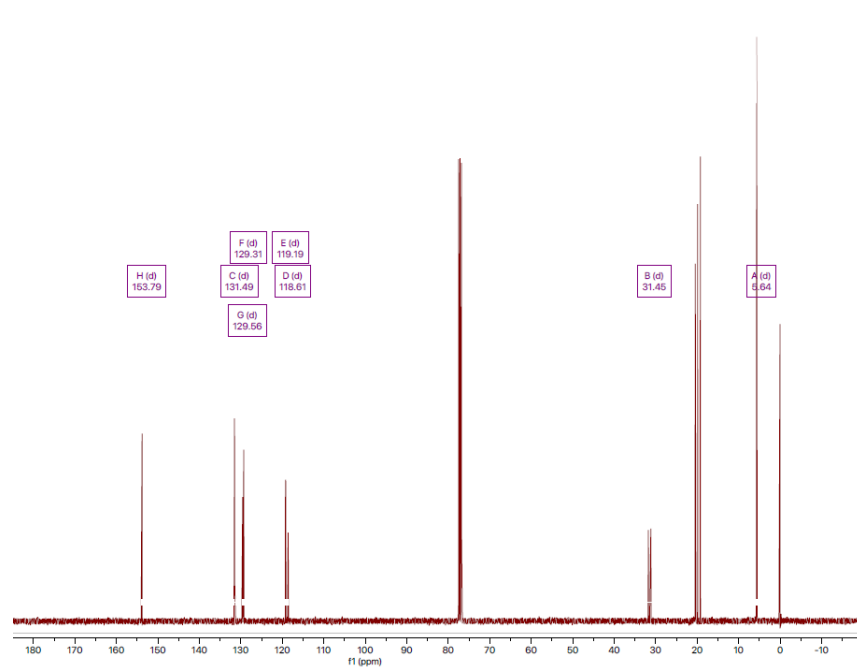

$^{31}\text{P}\{^1\text{H}\}$  Spectrum of **2b**

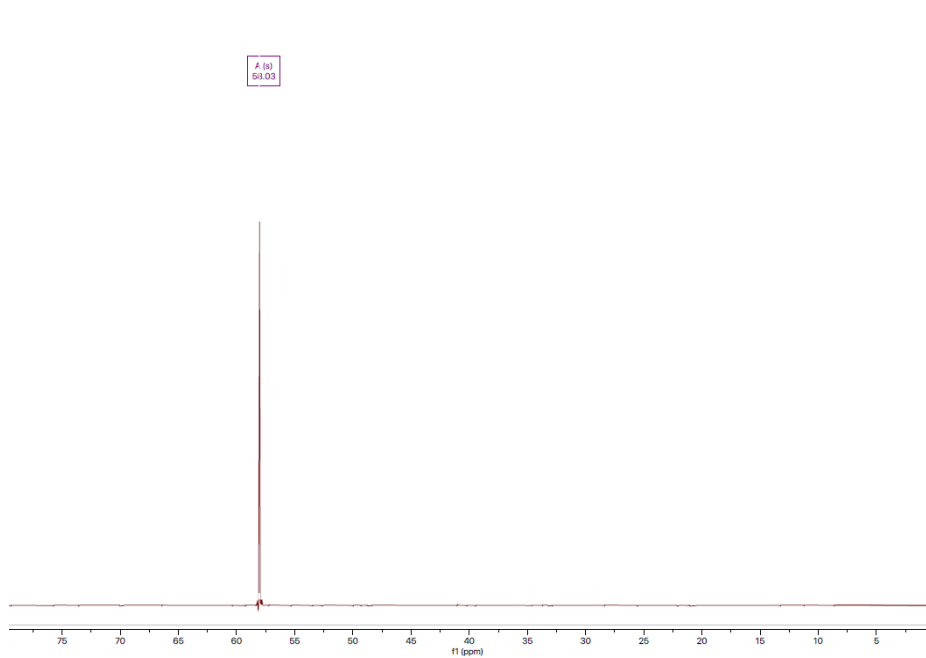

IR Spectrum of **2b**

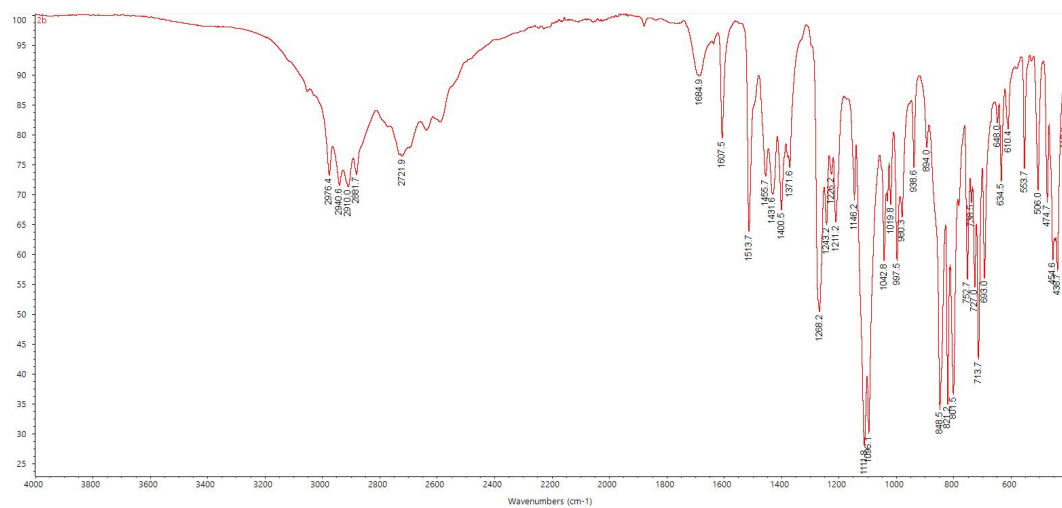

MS of **2b**

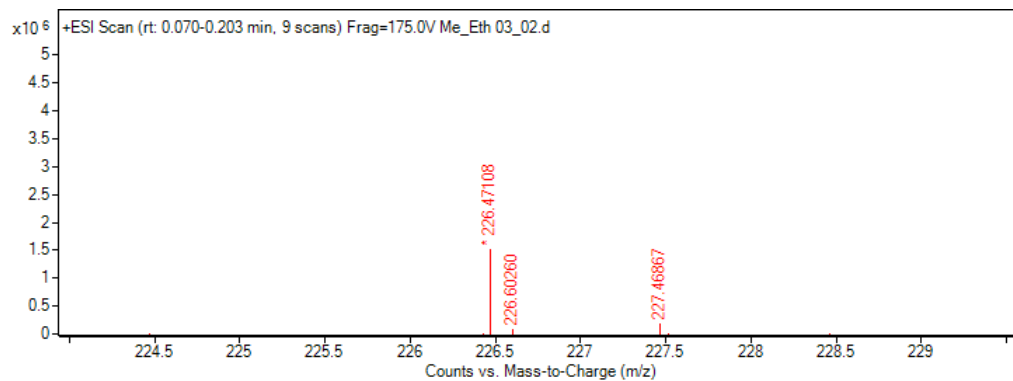



<sup>1</sup>H NMR spectrum of **2c**

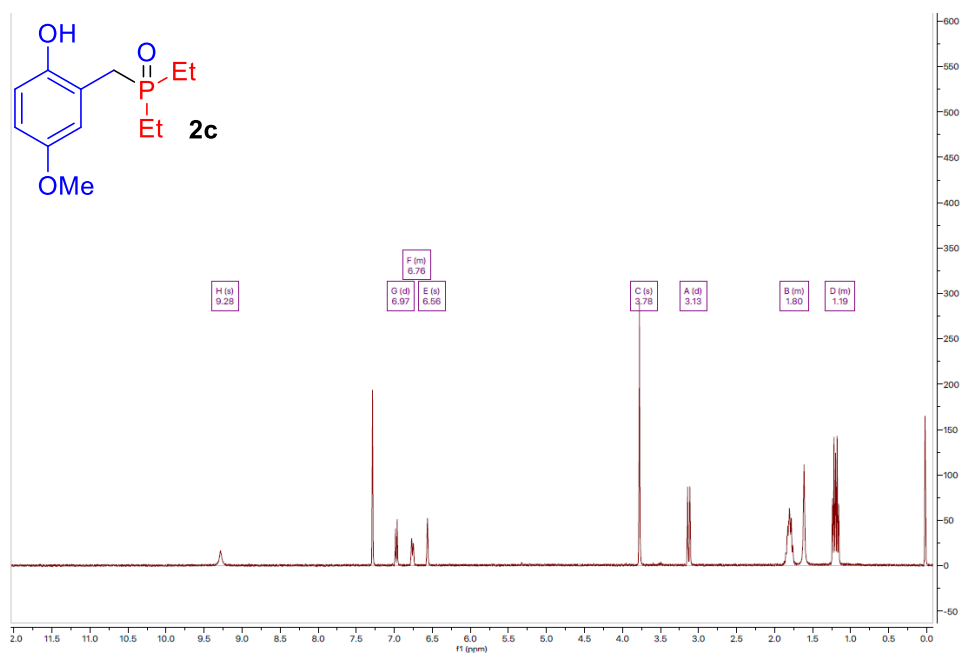

<sup>13</sup>C NMR spectrum of **2c**

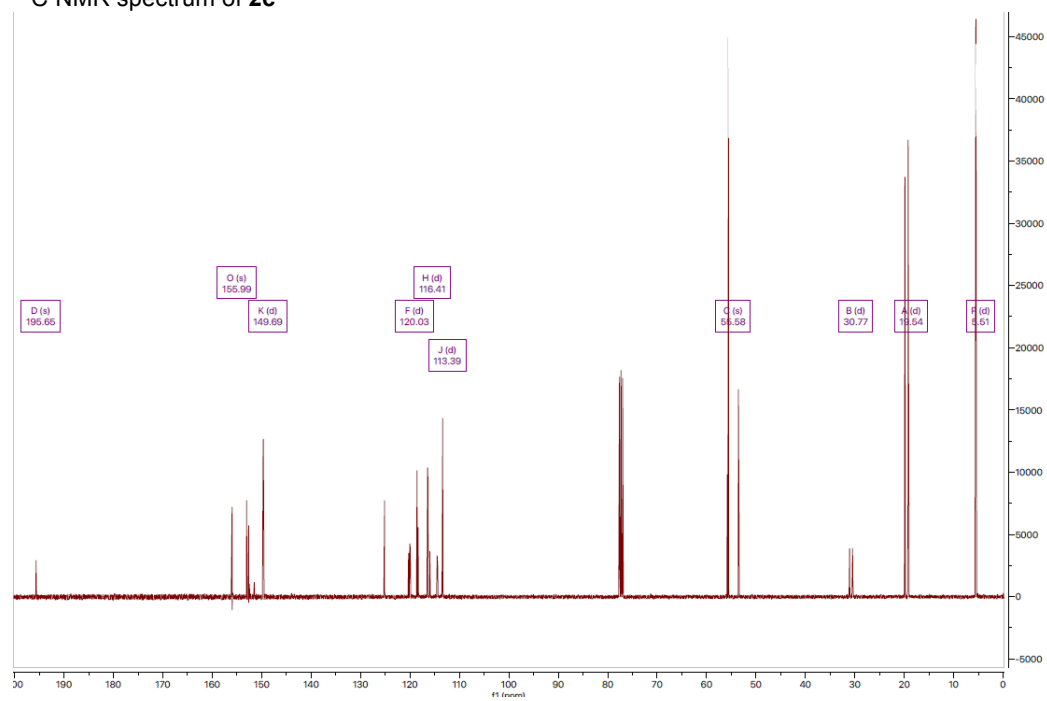

$^{31}\text{P}\{^1\text{H}\}$  NMR spectrum of **2c**

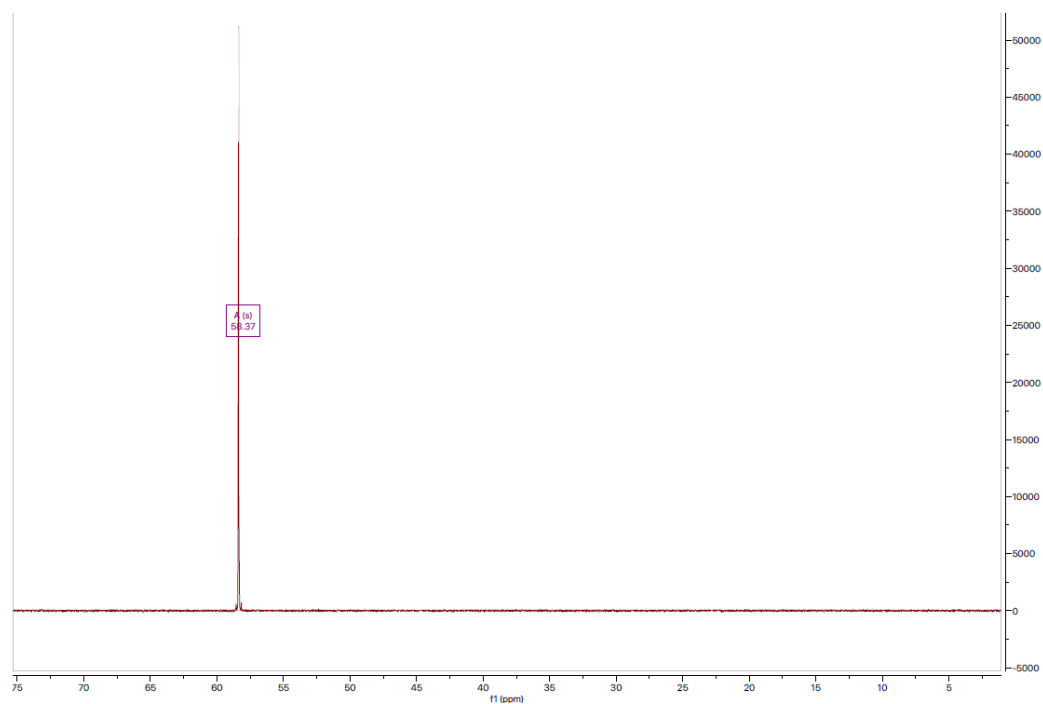

IR spectrum of **2c**

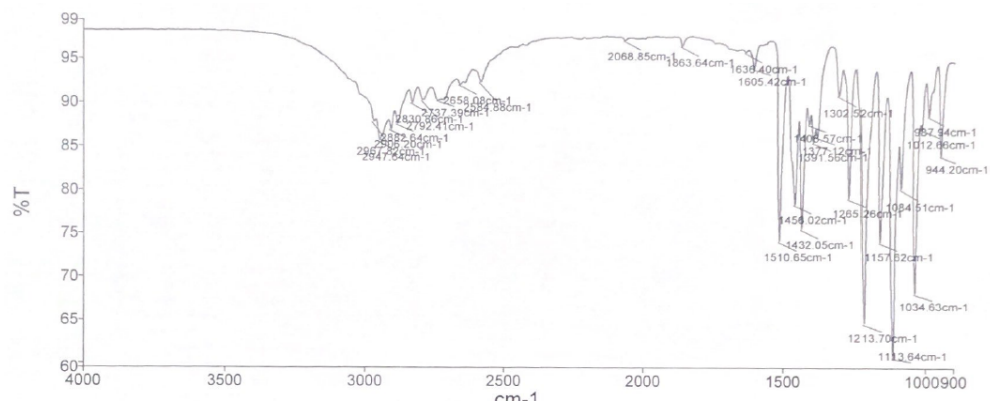

MS of **2c**

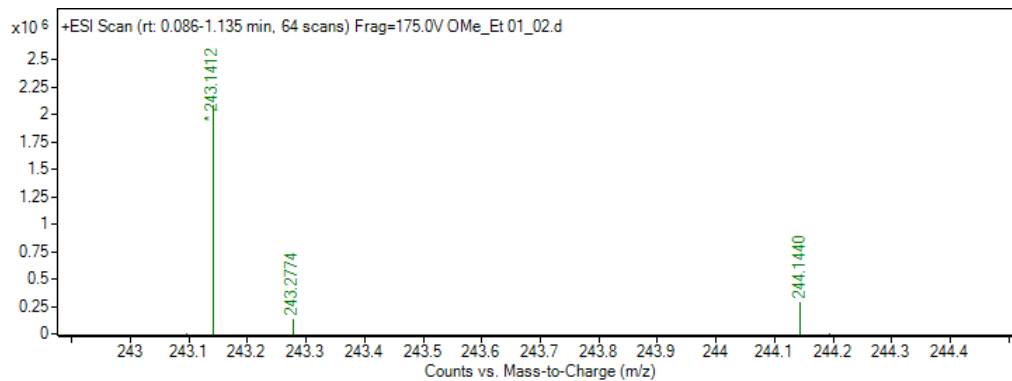

<sup>1</sup>H NMR spectrum of **2d**

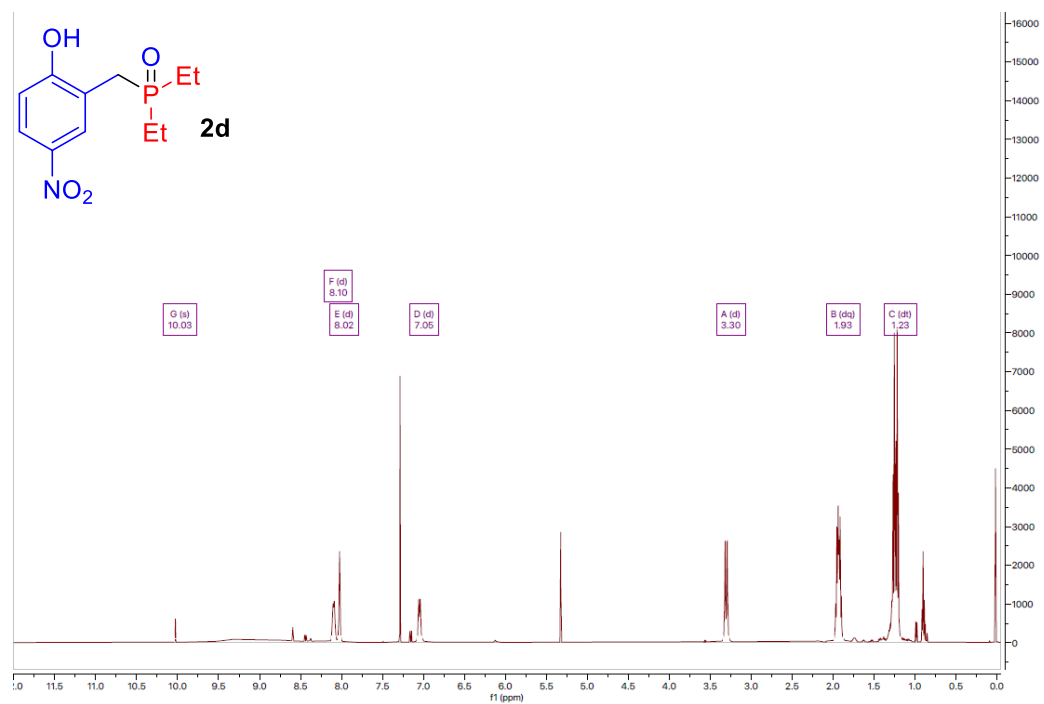

<sup>13</sup>C NMR spectrum of **2d**

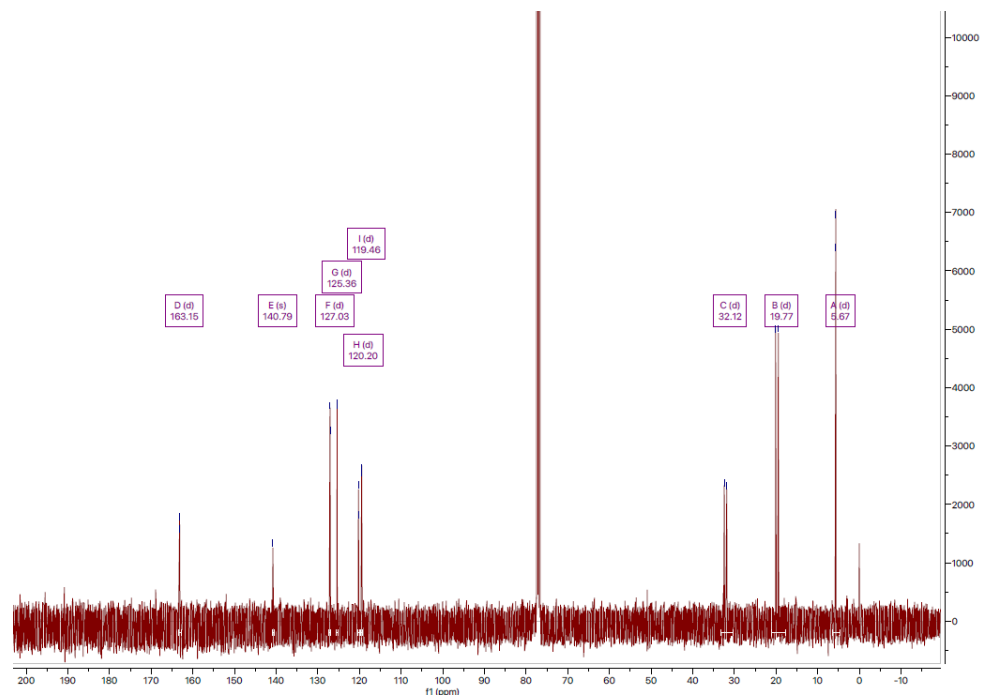

$^{31}\text{P}\{^1\text{H}\}$  NMR spectrum of **2d**

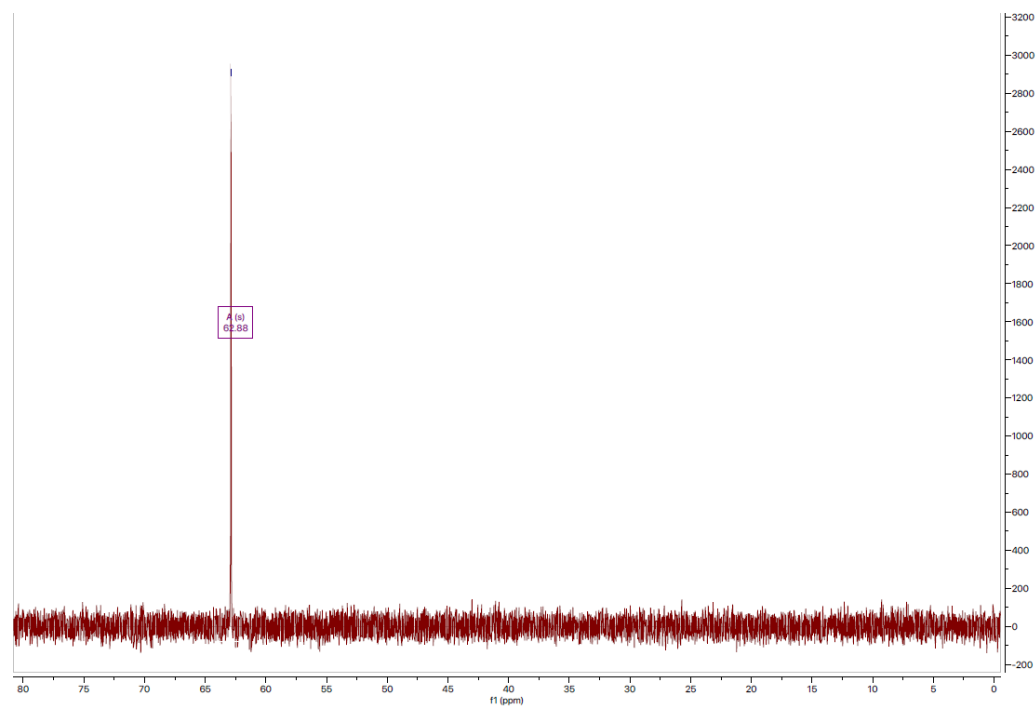

IR spectrum of **2d**

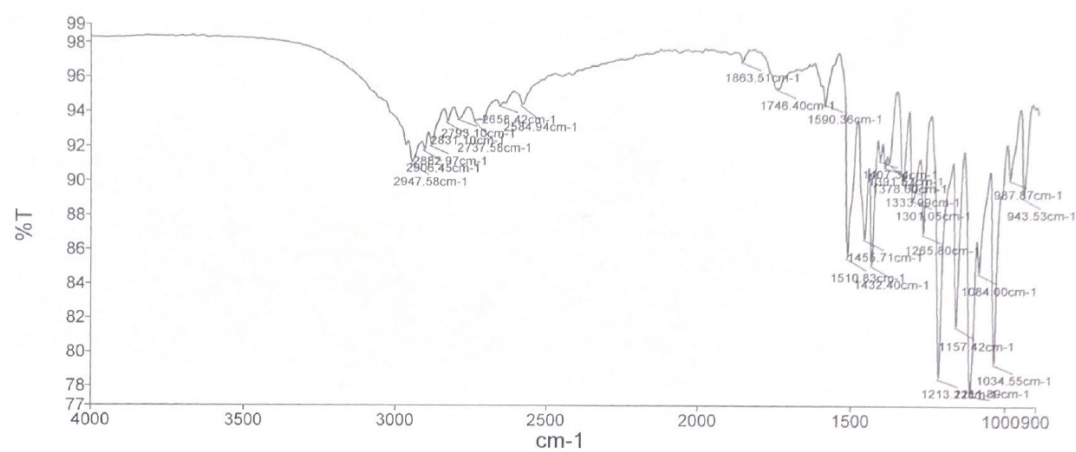

MS of **2d**

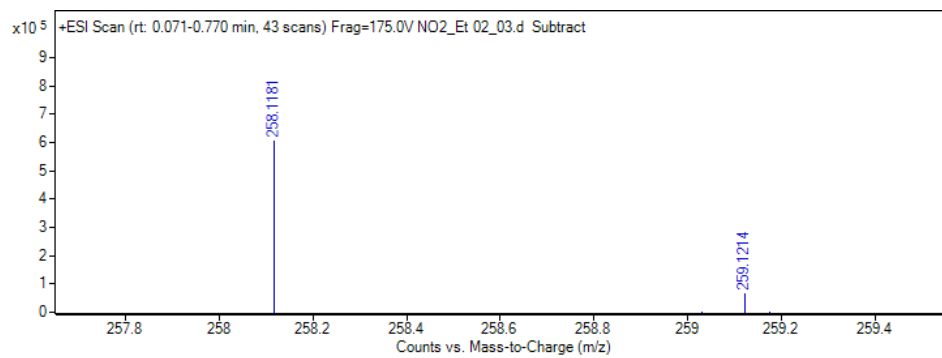

<sup>1</sup>H NMR Spectrum of **2e**

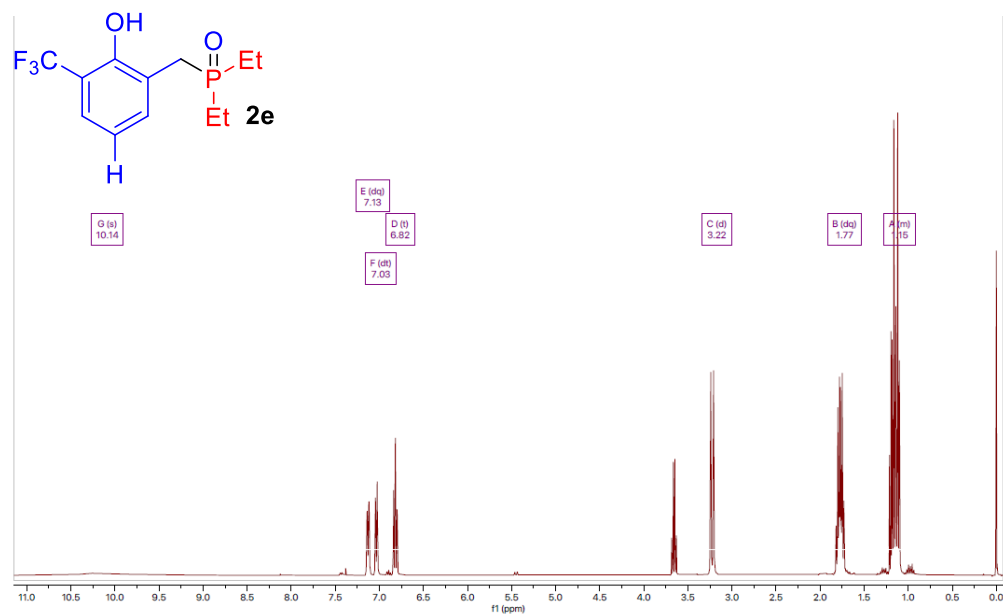

<sup>13</sup>C NMR of **2e**

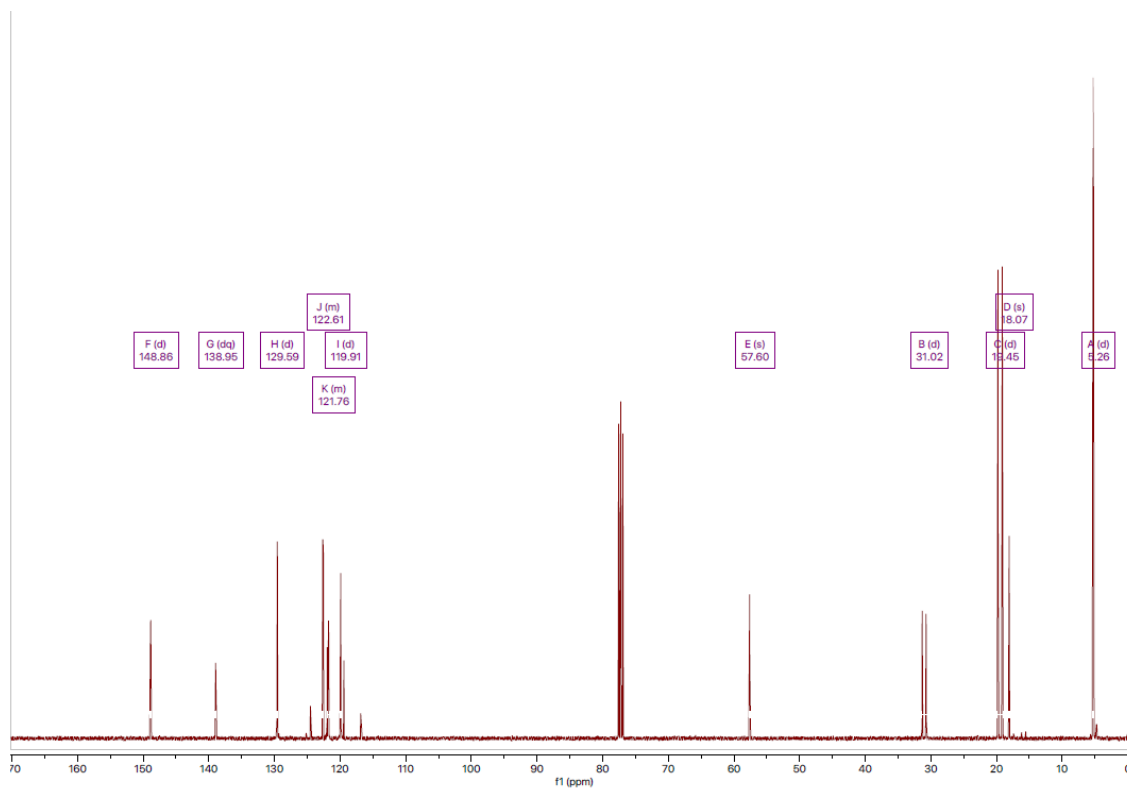

$^{19}\text{F}\{^1\text{H}\}$  NMR of **2e**

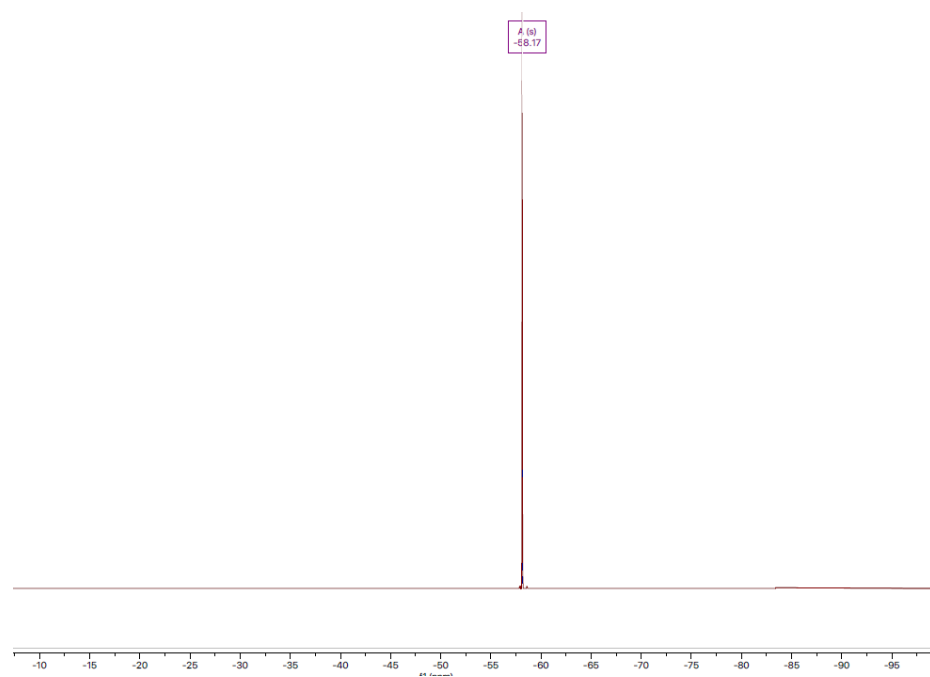

$^{31}\text{P}\{^1\text{H}\}$  NMR Spectrum of **2e**

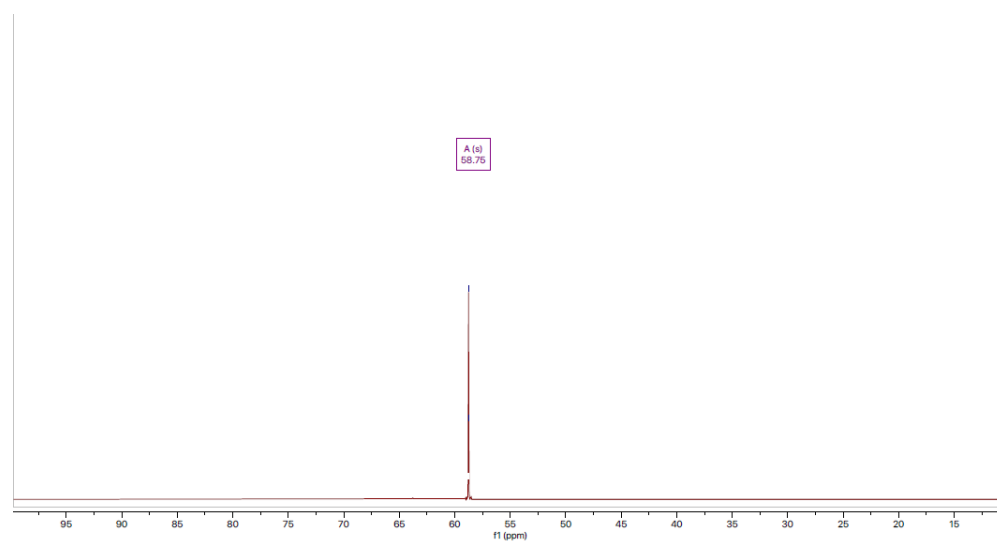

### IR Spectrum of **2e**

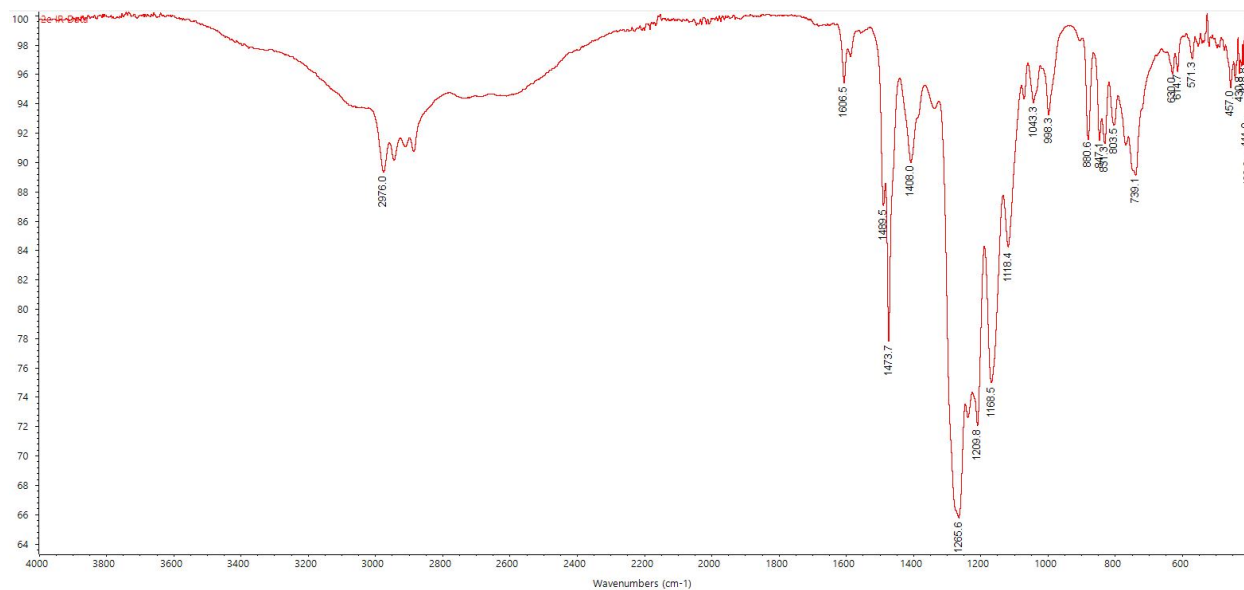

### MS of **2e**

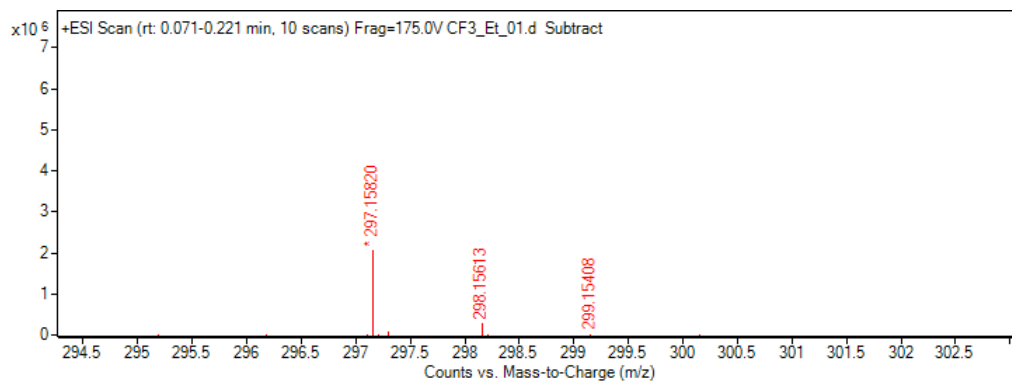

## Materials and Methods for Kinetic Studies

A Teflon-coated stir bar and 35 mL heavy-walled borosilicate pressure tube (Ace Glass Inc., "Tube C", Product #864807) were oven-dried overnight and then allowed to cool to ambient temperature in air. The tube was then charged with the aldehyde, and then flushed gently with dry nitrogen gas. Then, while maintaining the gentle nitrogen flush, trifluoroacetic acid was added in a single portion, followed quickly by the phosphine, which was also added swiftly in one portion by syringe. The tube was then sealed with a threaded Teflon cap fitted with a Viton o-ring. The sealed tube was then heated in an 80 °C aluminum-pebble bath behind a blast shield for 8–20 hours. The reaction vessel was then removed from the aluminum-pebble bath and allowed to cool to room temperature. Then the reaction tube was opened, and the contents were transferred into a 250 mL separatory funnel that had already been charged with 50 mL of half-saturated sodium bicarbonate (25 mL saturated sodium bicarbonate and 25 mL water). The reaction flask was rinsed with two 25 mL portions of dichloromethane, which were both transferred to the separatory funnel. After agitation, the layers were allowed to separate, and the organic layer was collected. The remaining aqueous phase was extracted with two more portions of dichloromethane (each 50 mL), and the organic phases were all combined, dried over sodium sulfate, and concentrated under vacuum to afford the crude product. All glassware, gloves, and other objects or surfaces which came into contact with phosphines was rinsed immediately in bleach (5 % sodium hypo-chlorite/water) to quench any residual phosphine, followed by water, and finally methanol.

## Kinetics of Catalyst Concentration

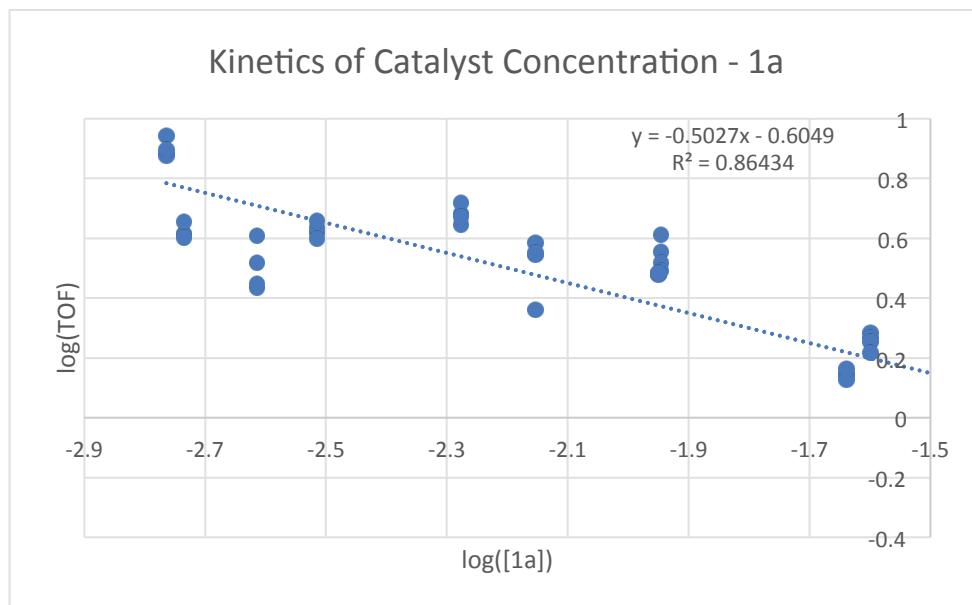



Kinetics of Catalyst Concentration - 1b

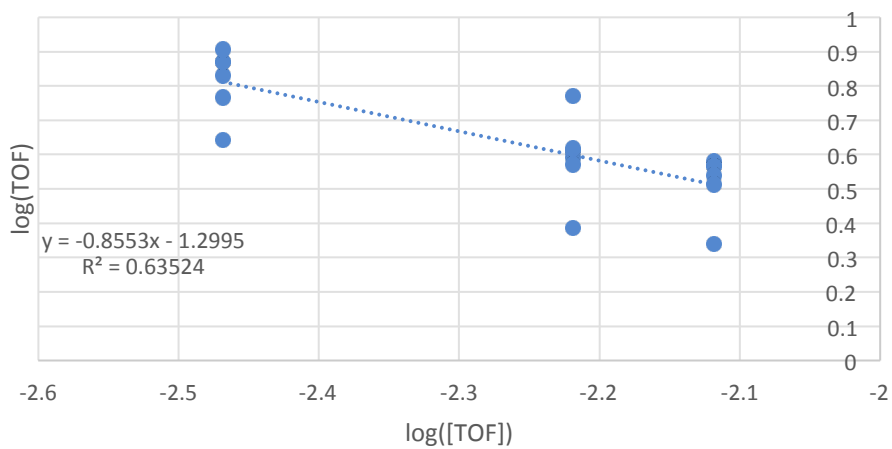

Kinetics of Catalyst Concentration - 1c

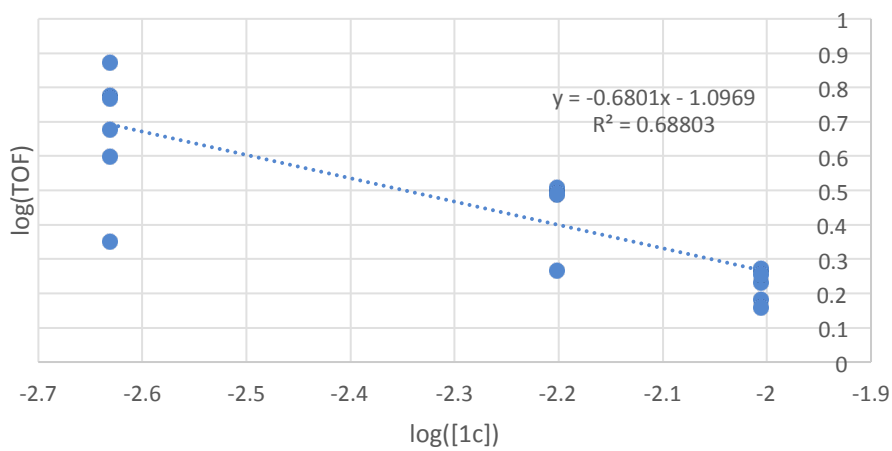

Kinetics of Catalyst Concentration - 1d

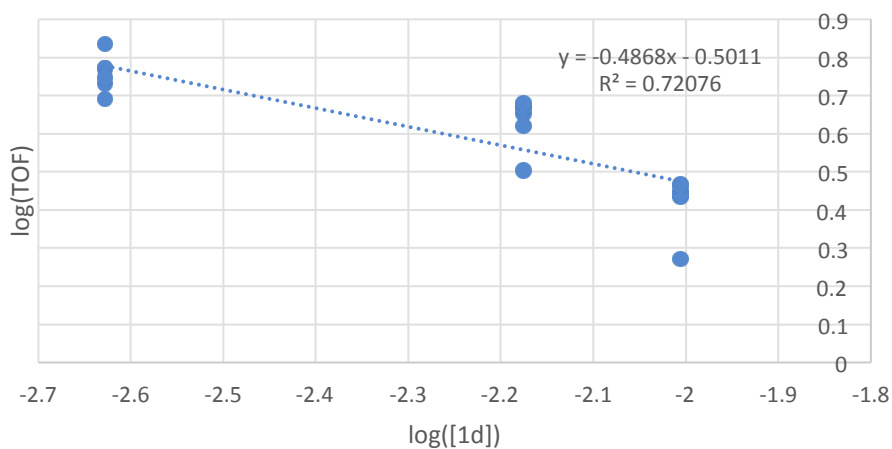

Kinetics of Catalyst Concentration - 2a

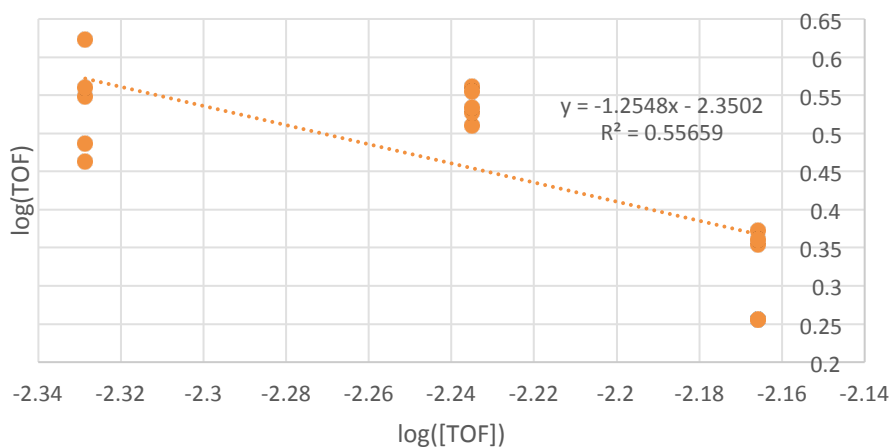

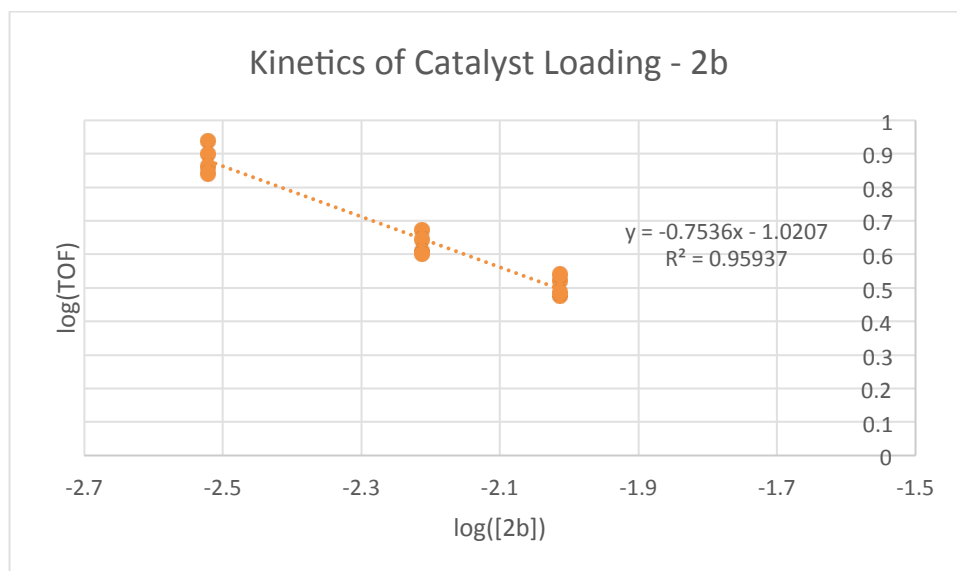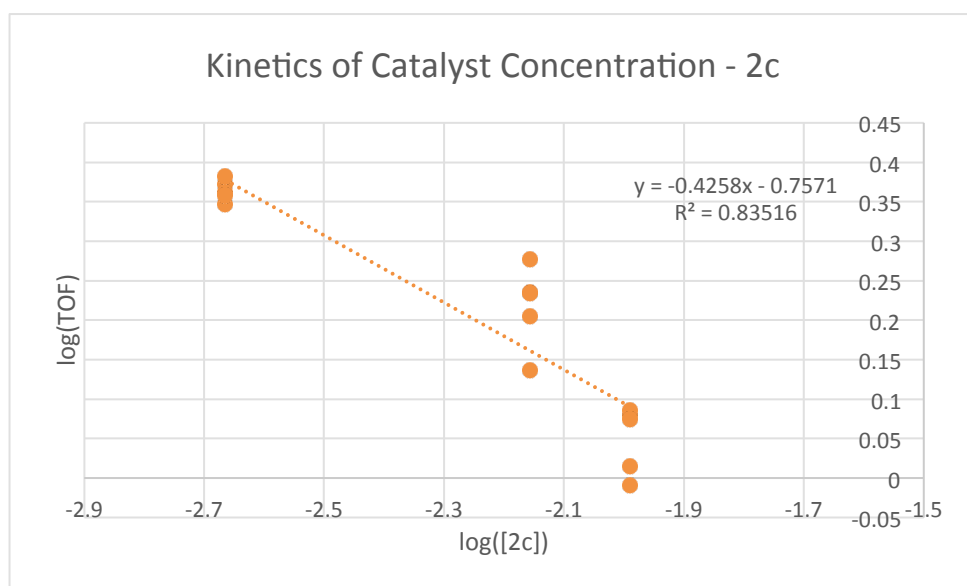

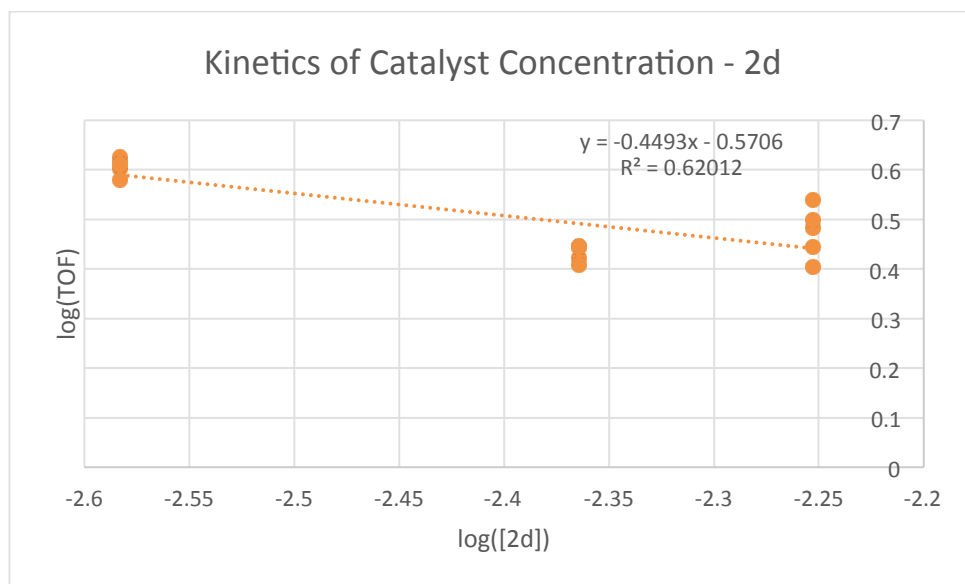

### Coordinates for computed optimized structures

All structures below were optimized using Gaussian 09, with the xB97X-D functional and 6-311G(d,p) basis set and the preset PCM for toluene (structures optimized with other basis sets and functionals were essentially identical). Energies discussed in the manuscript were thermally corrected to 413.15 K.

In All cases Ar = 2,4-dinitrophenyl.

#### 1. Structures from Table 1.

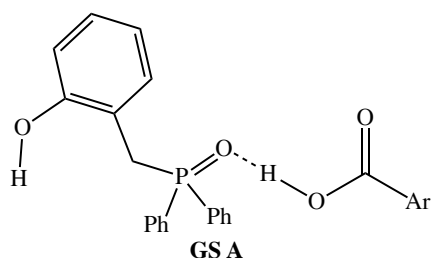

| Center<br>Number | Atomic<br>Number | Atomic<br>Type | Coordinates (Angstroms) |           |           |
|------------------|------------------|----------------|-------------------------|-----------|-----------|
|                  |                  |                | X                       | Y         | Z         |
| 1                | 6                | 0              | 5.936622                | -1.388691 | -1.307549 |
| 2                | 6                | 0              | 4.634722                | -0.954952 | -1.501577 |
| 3                | 6                | 0              | 3.597068                | -1.367311 | -0.666762 |
| 4                | 6                | 0              | 3.894061                | -2.207994 | 0.417524  |
| 5                | 6                | 0              | 5.200566                | -2.660629 | 0.598028  |
| 6                | 6                | 0              | 6.212590                | -2.257780 | -0.257659 |
| 7                | 1                | 0              | 6.725137                | -1.059684 | -1.973455 |
| 8                | 1                | 0              | 4.407854                | -0.285161 | -2.325349 |
| 9                | 1                | 0              | 5.395428                | -3.322068 | 1.433542  |
| 10               | 1                | 0              | 7.223460                | -2.615368 | -0.096940 |
| 11               | 6                | 0              | 2.184211                | -0.908876 | -0.936621 |
| 12               | 1                | 0              | 1.461162                | -1.721335 | -0.810484 |
| 13               | 1                | 0              | 2.100771                | -0.516466 | -1.952584 |
| 14               | 8                | 0              | 2.954147                | -2.637513 | 1.291378  |
| 15               | 1                | 0              | 2.333567                | -1.916706 | 1.490560  |
| 16               | 15               | 0              | 1.700239                | 0.382484  | 0.250283  |

|    |   |   |           |           |           |
|----|---|---|-----------|-----------|-----------|
| 17 | 8 | 0 | 1.614786  | -0.212602 | 1.648998  |
| 18 | 6 | 0 | 0.155042  | 1.154671  | -0.303043 |
| 19 | 6 | 0 | -0.606954 | 0.633458  | -1.347843 |
| 20 | 6 | 0 | -0.307901 | 2.269686  | 0.401779  |
| 21 | 6 | 0 | -1.818443 | 1.224779  | -1.687531 |
| 22 | 1 | 0 | -0.290690 | -0.257107 | -1.876691 |
| 23 | 6 | 0 | -1.518035 | 2.854819  | 0.061165  |
| 24 | 1 | 0 | 0.279440  | 2.676154  | 1.218431  |
| 25 | 6 | 0 | -2.272707 | 2.332806  | -0.985281 |
| 26 | 1 | 0 | -2.410161 | 0.796707  | -2.487141 |
| 27 | 1 | 0 | -1.873550 | 3.718224  | 0.611314  |
| 28 | 1 | 0 | -3.220020 | 2.789667  | -1.248808 |
| 29 | 6 | 0 | 2.973157  | 1.657709  | 0.158459  |
| 30 | 6 | 0 | 4.030156  | 1.603091  | 1.065450  |
| 31 | 6 | 0 | 2.974213  | 2.605030  | -0.865135 |
| 32 | 6 | 0 | 5.084514  | 2.498206  | 0.947531  |
| 33 | 1 | 0 | 4.019044  | 0.859462  | 1.853929  |
| 34 | 6 | 0 | 4.031435  | 3.497147  | -0.977991 |
| 35 | 1 | 0 | 2.147855  | 2.653554  | -1.567005 |
| 36 | 6 | 0 | 5.085840  | 3.441354  | -0.073125 |
| 37 | 1 | 0 | 5.908107  | 2.455255  | 1.650225  |
| 38 | 1 | 0 | 4.031881  | 4.237150  | -1.769728 |
| 39 | 1 | 0 | 5.911727  | 4.137694  | -0.164100 |
| 40 | 6 | 0 | -1.351343 | -1.208675 | 1.225678  |
| 41 | 8 | 0 | -0.724674 | -1.883964 | 0.445912  |
| 42 | 8 | 0 | -0.864042 | -0.663722 | 2.320231  |
| 43 | 1 | 0 | 0.129721  | -0.633584 | 2.238201  |
| 44 | 6 | 0 | -2.775676 | -0.810926 | 0.965277  |
| 45 | 6 | 0 | -3.468549 | -1.300592 | -0.138942 |
| 46 | 6 | 0 | -3.379573 | 0.183681  | 1.730115  |
| 47 | 6 | 0 | -4.706728 | -0.814866 | -0.506699 |
| 48 | 6 | 0 | -4.631971 | 0.678119  | 1.402798  |
| 49 | 1 | 0 | -2.836110 | 0.582094  | 2.575536  |
| 50 | 6 | 0 | -5.268302 | 0.172057  | 0.283992  |

|    |   |   |           |           |           |
|----|---|---|-----------|-----------|-----------|
| 51 | 1 | 0 | -5.227590 | -1.184602 | -1.379276 |
| 52 | 1 | 0 | -5.108295 | 1.453360  | 1.986354  |
| 53 | 7 | 0 | -2.915028 | -2.365481 | -1.001227 |
| 54 | 8 | 0 | -2.930540 | -3.486771 | -0.560197 |
| 55 | 8 | 0 | -2.556334 | -2.028518 | -2.111060 |
| 56 | 7 | 0 | -6.589486 | 0.714431  | -0.100549 |
| 57 | 8 | 0 | -7.127741 | 0.231051  | -1.073378 |
| 58 | 8 | 0 | -7.041705 | 1.609655  | 0.580544  |

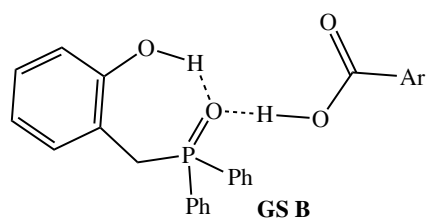

| Center<br>Number | Atomic<br>Number | Atomic<br>Type | Coordinates (Angstroms) |           |           |
|------------------|------------------|----------------|-------------------------|-----------|-----------|
|                  |                  |                | X                       | Y         | Z         |
| 1                | 1                | 0              | -4.240013               | -3.801914 | -1.881784 |
| 2                | 6                | 0              | -4.504051               | -2.883561 | -1.365641 |
| 3                | 6                | 0              | -5.187563               | -0.564923 | -0.023146 |
| 4                | 6                | 0              | -5.543869               | -2.092342 | -1.834819 |
| 5                | 6                | 0              | -3.804455               | -2.510706 | -0.221710 |
| 6                | 6                | 0              | -4.124045               | -1.327302 | 0.452545  |
| 7                | 6                | 0              | -5.897910               | -0.933556 | -1.157435 |
| 8                | 1                | 0              | -6.082361               | -2.392494 | -2.726214 |
| 9                | 1                | 0              | -6.715711               | -0.317788 | -1.510628 |
| 10               | 1                | 0              | -5.442554               | 0.351972  | 0.497724  |
| 11               | 8                | 0              | -2.807292               | -3.273112 | 0.298607  |
| 12               | 6                | 0              | -3.323657               | -0.881275 | 1.641863  |
| 13               | 1                | 0              | -2.943803               | -1.729507 | 2.215237  |
| 14               | 1                | 0              | -3.933810               | -0.277678 | 2.318908  |
| 15               | 15               | 0              | -1.873423               | 0.191279  | 1.304068  |

|    |   |   |           |           |           |
|----|---|---|-----------|-----------|-----------|
| 16 | 6 | 0 | -0.631713 | -0.788295 | 0.402708  |
| 17 | 6 | 0 | 1.432420  | -2.244967 | -0.777563 |
| 18 | 6 | 0 | -0.160187 | -1.959177 | 1.002949  |
| 19 | 6 | 0 | -0.043739 | -0.343182 | -0.780488 |
| 20 | 6 | 0 | 0.981501  | -1.074444 | -1.370726 |
| 21 | 6 | 0 | 0.864194  | -2.684382 | 0.414827  |
| 22 | 1 | 0 | -0.592109 | -2.305511 | 1.934786  |
| 23 | 1 | 0 | -0.349270 | 0.594375  | -1.227157 |
| 24 | 1 | 0 | 1.440676  | -0.702190 | -2.278272 |
| 25 | 1 | 0 | 1.224657  | -3.590193 | 0.888976  |
| 26 | 1 | 0 | 2.238024  | -2.809665 | -1.233972 |
| 27 | 6 | 0 | -2.410398 | 1.526805  | 0.209419  |
| 28 | 6 | 0 | -3.221924 | 3.669917  | -1.362928 |
| 29 | 6 | 0 | -2.338644 | 2.825268  | 0.709626  |
| 30 | 6 | 0 | -2.879621 | 1.304428  | -1.088206 |
| 31 | 6 | 0 | -3.285304 | 2.376062  | -1.869500 |
| 32 | 6 | 0 | -2.746896 | 3.894104  | -0.077473 |
| 33 | 1 | 0 | -1.942475 | 2.986304  | 1.704805  |
| 34 | 1 | 0 | -2.924372 | 0.300460  | -1.493996 |
| 35 | 1 | 0 | -3.646932 | 2.200687  | -2.875882 |
| 36 | 1 | 0 | -2.681426 | 4.903561  | 0.310799  |
| 37 | 1 | 0 | -3.534485 | 4.506284  | -1.977960 |
| 38 | 1 | 0 | -2.593524 | -3.985595 | -0.305131 |
| 39 | 8 | 0 | -1.348702 | 0.708471  | 2.624590  |
| 40 | 6 | 0 | 3.332429  | 1.088434  | -0.238383 |
| 41 | 6 | 0 | 4.428941  | -1.099594 | 1.047749  |
| 42 | 6 | 0 | 4.364170  | 0.406680  | -0.851091 |
| 43 | 6 | 0 | 2.807361  | 0.695989  | 0.989888  |
| 44 | 6 | 0 | 3.375608  | -0.406689 | 1.622282  |
| 45 | 6 | 0 | 4.898157  | -0.681932 | -0.184529 |
| 46 | 1 | 0 | 4.748250  | 0.703894  | -1.817209 |
| 47 | 1 | 0 | 2.955444  | -0.727823 | 2.565204  |
| 48 | 1 | 0 | 4.873647  | -1.960286 | 1.527174  |
| 49 | 7 | 0 | 5.995736  | -1.432830 | -0.829391 |



|    |   |   |          |           |           |
|----|---|---|----------|-----------|-----------|
| 50 | 8 | 0 | 6.403146 | -1.020768 | -1.894700 |
| 51 | 8 | 0 | 6.412272 | -2.414754 | -0.252104 |
| 52 | 7 | 0 | 2.811212 | 2.256654  | -0.978465 |
| 53 | 8 | 0 | 3.106337 | 3.346188  | -0.554453 |
| 54 | 8 | 0 | 2.194614 | 2.019444  | -1.996270 |
| 55 | 6 | 0 | 1.556038 | 1.326362  | 1.537196  |
| 56 | 8 | 0 | 0.917166 | 2.124532  | 0.897431  |
| 57 | 8 | 0 | 1.216236 | 0.839965  | 2.710597  |
| 58 | 1 | 0 | 0.223594 | 0.951088  | 2.824512  |

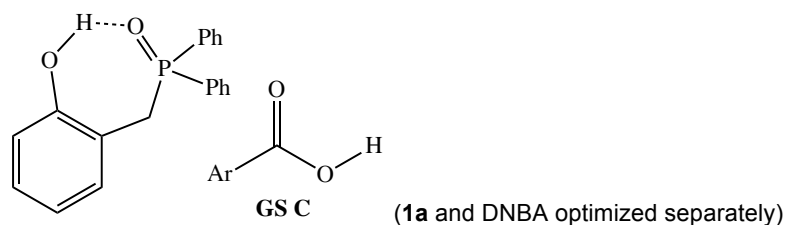

### 1a

| Center<br>Number | Atomic<br>Number | Atomic<br>Type | Coordinates (Angstroms) |           |           |
|------------------|------------------|----------------|-------------------------|-----------|-----------|
|                  |                  |                | X                       | Y         | Z         |
| 1                | 6                | 0              | 4.039070                | -0.171094 | -1.489718 |
| 2                | 6                | 0              | 2.659083                | -0.263842 | -1.587463 |
| 3                | 6                | 0              | 1.912452                | -1.030840 | -0.694639 |
| 4                | 6                | 0              | 2.580345                | -1.700220 | 0.345861  |
| 5                | 6                | 0              | 3.970356                | -1.621530 | 0.428313  |
| 6                | 6                | 0              | 4.694156                | -0.866257 | -0.479814 |
| 7                | 1                | 0              | 4.596866                | 0.427674  | -2.199687 |
| 8                | 1                | 0              | 2.143883                | 0.255880  | -2.389619 |
| 9                | 1                | 0              | 4.458261                | -2.159575 | 1.232104  |
| 10               | 1                | 0              | 5.773594                | -0.812791 | -0.392374 |

|    |    |   |           |           |           |
|----|----|---|-----------|-----------|-----------|
| 11 | 6  | 0 | 0.423209  | -1.180221 | -0.881675 |
| 12 | 1  | 0 | 0.128560  | -2.234872 | -0.834327 |
| 13 | 1  | 0 | 0.109243  | -0.801002 | -1.857426 |
| 14 | 8  | 0 | 1.938662  | -2.470935 | 1.251809  |
| 15 | 1  | 0 | 1.111543  | -2.035806 | 1.547131  |
| 16 | 15 | 0 | -0.552402 | -0.373778 | 0.432144  |
| 17 | 8  | 0 | -0.265338 | -0.991723 | 1.773520  |
| 18 | 6  | 0 | -2.293518 | -0.579848 | -0.040622 |
| 19 | 6  | 0 | -3.038374 | -1.523647 | 0.665350  |
| 20 | 6  | 0 | -2.885573 | 0.133068  | -1.083735 |
| 21 | 6  | 0 | -4.364570 | -1.757304 | 0.323195  |
| 22 | 1  | 0 | -2.572638 | -2.056734 | 1.486563  |
| 23 | 6  | 0 | -4.209814 | -0.105025 | -1.423084 |
| 24 | 1  | 0 | -2.324352 | 0.888616  | -1.622659 |
| 25 | 6  | 0 | -4.948483 | -1.051714 | -0.721074 |
| 26 | 1  | 0 | -4.942465 | -2.488852 | 0.875924  |
| 27 | 1  | 0 | -4.668732 | 0.452970  | -2.231003 |
| 28 | 1  | 0 | -5.983754 | -1.234012 | -0.986140 |
| 29 | 6  | 0 | -0.166817 | 1.395446  | 0.378321  |
| 30 | 6  | 0 | -0.067654 | 2.066839  | 1.595594  |
| 31 | 6  | 0 | 0.041367  | 2.089039  | -0.814524 |
| 32 | 6  | 0 | 0.219403  | 3.425574  | 1.616702  |
| 33 | 1  | 0 | -0.201033 | 1.512541  | 2.517737  |
| 34 | 6  | 0 | 0.328031  | 3.446445  | -0.789440 |
| 35 | 1  | 0 | -0.002210 | 1.573908  | -1.768076 |
| 36 | 6  | 0 | 0.413650  | 4.115143  | 0.426536  |
| 37 | 1  | 0 | 0.298573  | 3.944394  | 2.564870  |
| 38 | 1  | 0 | 0.494386  | 3.980787  | -1.717526 |
| 39 | 1  | 0 | 0.641803  | 5.174731  | 0.445202  |

---

## DNBA

---

| Center | Atomic | Atomic | Coordinates (Angstroms) |   |   |
|--------|--------|--------|-------------------------|---|---|
| Number | Number | Type   | X                       | Y | Z |

---

|    |   |   |           |           |           |
|----|---|---|-----------|-----------|-----------|
| 1  | 6 | 0 | 0.937322  | -0.751576 | 0.001502  |
| 2  | 6 | 0 | 0.437481  | 0.548058  | -0.029661 |
| 3  | 6 | 0 | -0.917527 | 0.815153  | -0.015299 |
| 4  | 6 | 0 | -1.782881 | -0.263261 | 0.004859  |
| 5  | 6 | 0 | -1.335243 | -1.572518 | 0.006131  |
| 6  | 6 | 0 | 0.031401  | -1.807228 | 0.004030  |
| 7  | 6 | 0 | 2.397097  | -1.101452 | 0.068760  |
| 8  | 8 | 0 | 2.895122  | -1.969153 | -0.588017 |
| 9  | 8 | 0 | 3.032613  | -0.397524 | 1.007555  |
| 10 | 1 | 0 | 3.965383  | -0.641650 | 0.974917  |
| 11 | 7 | 0 | 1.343648  | 1.705556  | -0.165418 |
| 12 | 8 | 0 | 1.014985  | 2.731185  | 0.387717  |
| 13 | 8 | 0 | 2.328315  | 1.550985  | -0.854797 |
| 14 | 1 | 0 | -1.287767 | 1.830710  | -0.028215 |
| 15 | 7 | 0 | -3.239216 | -0.000551 | 0.011895  |
| 16 | 8 | 0 | -3.593864 | 1.157538  | -0.013907 |
| 17 | 8 | 0 | -3.974273 | -0.963559 | 0.044390  |
| 18 | 1 | 0 | -2.051169 | -2.382801 | 0.011916  |
| 19 | 1 | 0 | 0.413442  | -2.820126 | 0.010585  |

---

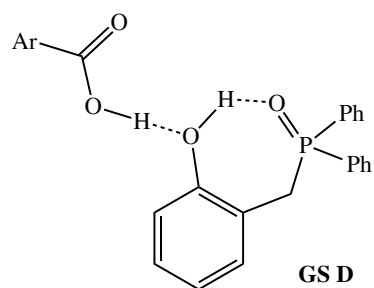


---

| Center | Atomic | Atomic | Coordinates (Angstroms) |           |           |
|--------|--------|--------|-------------------------|-----------|-----------|
| Number | Number | Type   | X                       | Y         | Z         |
| <hr/>  |        |        |                         |           |           |
| 1      | 6      | 0      | -1.555816               | 3.861511  | 1.763495  |
| 2      | 6      | 0      | -2.533781               | 3.036319  | 1.232373  |
| 3      | 6      | 0      | -2.353249               | 2.366489  | 0.022391  |
| 4      | 6      | 0      | -1.125718               | 2.515407  | -0.639798 |
| 5      | 6      | 0      | -0.152479               | 3.368003  | -0.125567 |
| 6      | 6      | 0      | -0.365361               | 4.035416  | 1.069035  |
| 7      | 1      | 0      | -1.725019               | 4.368496  | 2.705672  |
| 8      | 1      | 0      | -3.471647               | 2.906084  | 1.762988  |
| 9      | 1      | 0      | 0.776570                | 3.481587  | -0.672059 |
| 10     | 1      | 0      | 0.409260                | 4.683663  | 1.461758  |
| 11     | 6      | 0      | -3.475458               | 1.519907  | -0.528960 |
| 12     | 1      | 0      | -3.702249               | 1.781014  | -1.568717 |
| 13     | 1      | 0      | -4.382093               | 1.679427  | 0.058118  |
| 14     | 8      | 0      | -0.823782               | 1.863307  | -1.804028 |
| 15     | 1      | 0      | -1.295602               | 0.991348  | -1.860231 |
| 16     | 15     | 0      | -3.054393               | -0.258308 | -0.559989 |
| 17     | 8      | 0      | -1.954497               | -0.480136 | -1.568949 |
| 18     | 6      | 0      | -4.565136               | -1.162372 | -0.982677 |
| 19     | 6      | 0      | -4.447246               | -2.206424 | -1.899581 |
| 20     | 6      | 0      | -5.814329               | -0.850537 | -0.442400 |
| 21     | 6      | 0      | -5.569280               | -2.940514 | -2.261524 |
| 22     | 1      | 0      | -3.476150               | -2.424938 | -2.329394 |
| 23     | 6      | 0      | -6.932900               | -1.586494 | -0.808355 |
| 24     | 1      | 0      | -5.924278               | -0.033502 | 0.262879  |

|    |   |   |           |           |           |
|----|---|---|-----------|-----------|-----------|
| 25 | 6 | 0 | -6.809297 | -2.632801 | -1.715688 |
| 26 | 1 | 0 | -5.474995 | -3.751199 | -2.974456 |
| 27 | 1 | 0 | -7.901506 | -1.341041 | -0.388815 |
| 28 | 1 | 0 | -7.684111 | -3.205632 | -2.001371 |
| 29 | 6 | 0 | -2.558985 | -0.694671 | 1.123066  |
| 30 | 6 | 0 | -1.216629 | -0.502232 | 1.456931  |
| 31 | 6 | 0 | -3.457908 | -1.147882 | 2.088751  |
| 32 | 6 | 0 | -0.781247 | -0.752305 | 2.750139  |
| 33 | 1 | 0 | -0.508704 | -0.164457 | 0.708730  |
| 34 | 6 | 0 | -3.016670 | -1.396063 | 3.381531  |
| 35 | 1 | 0 | -4.496139 | -1.328720 | 1.834561  |
| 36 | 6 | 0 | -1.681147 | -1.195522 | 3.711444  |
| 37 | 1 | 0 | 0.264650  | -0.609182 | 2.988763  |
| 38 | 1 | 0 | -3.714631 | -1.755387 | 4.128956  |
| 39 | 1 | 0 | -1.338953 | -1.393734 | 4.720957  |
| 40 | 6 | 0 | 2.639468  | 1.370952  | -1.361375 |
| 41 | 8 | 0 | 2.756143  | 2.537818  | -1.625047 |
| 42 | 8 | 0 | 1.548788  | 0.643859  | -1.478668 |
| 43 | 1 | 0 | 0.765849  | 1.203189  | -1.710427 |
| 44 | 6 | 0 | 3.819310  | 0.537171  | -0.928123 |
| 45 | 6 | 0 | 4.988767  | 0.645042  | -1.673806 |
| 46 | 6 | 0 | 3.803204  | -0.356128 | 0.140124  |
| 47 | 6 | 0 | 6.096896  | -0.135123 | -1.381678 |
| 48 | 1 | 0 | 5.015277  | 1.350101  | -2.494877 |
| 49 | 6 | 0 | 4.885703  | -1.156136 | 0.452033  |
| 50 | 6 | 0 | 6.020849  | -1.028102 | -0.326614 |
| 51 | 1 | 0 | 7.009617  | -0.064063 | -1.957065 |
| 52 | 1 | 0 | 4.850385  | -1.851668 | 1.278632  |
| 53 | 7 | 0 | 2.642888  | -0.429618 | 1.047114  |
| 54 | 8 | 0 | 2.387805  | -1.509305 | 1.535623  |
| 55 | 8 | 0 | 2.052669  | 0.605234  | 1.274051  |
| 56 | 7 | 0 | 7.194685  | -1.867721 | -0.006625 |
| 57 | 8 | 0 | 8.170857  | -1.749149 | -0.715612 |
| 58 | 8 | 0 | 7.100513  | -2.616985 | 0.941484  |

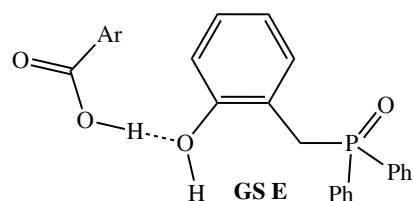

| Center<br>Number | Atomic<br>Number | Atomic<br>Type | Coordinates (Angstroms) |           |           |
|------------------|------------------|----------------|-------------------------|-----------|-----------|
|                  |                  |                | X                       | Y         | Z         |
| 1                | 15               | 0              | -3.212496               | 1.140341  | 0.089673  |
| 2                | 8                | 0              | -4.659448               | 1.367548  | 0.372916  |
| 3                | 6                | 0              | -2.945847               | 0.223089  | -1.488544 |
| 4                | 6                | 0              | -3.526157               | -1.159826 | -1.394928 |
| 5                | 6                | 0              | -2.742122               | -2.256156 | -1.033035 |
| 6                | 8                | 0              | -1.398354               | -2.056886 | -0.850277 |
| 7                | 6                | 0              | -3.299154               | -3.516311 | -0.861381 |
| 8                | 6                | 0              | -4.664222               | -3.694957 | -1.034340 |
| 9                | 6                | 0              | -5.465601               | -2.617966 | -1.389372 |
| 10               | 6                | 0              | -4.893834               | -1.365895 | -1.566177 |
| 11               | 1                | 0              | -3.463521               | 0.810767  | -2.251081 |
| 12               | 1                | 0              | -1.885843               | 0.214689  | -1.745251 |
| 13               | 1                | 0              | -0.995315               | -2.740825 | -0.302624 |
| 14               | 1                | 0              | -2.662555               | -4.351142 | -0.586454 |
| 15               | 1                | 0              | -5.097339               | -4.678150 | -0.892028 |
| 16               | 1                | 0              | -6.532617               | -2.749034 | -1.521214 |
| 17               | 1                | 0              | -5.516964               | -0.513521 | -1.811348 |
| 18               | 6                | 0              | -2.392684               | 0.100967  | 1.338059  |
| 19               | 6                | 0              | -3.147017               | -0.947355 | 1.868791  |
| 20               | 6                | 0              | -2.555243               | -1.864064 | 2.727477  |
| 21               | 6                | 0              | -1.214062               | -1.733295 | 3.070224  |
| 22               | 6                | 0              | -0.469749               | -0.671584 | 2.570180  |
| 23               | 6                | 0              | -1.056429               | 0.244892  | 1.707238  |
| 24               | 1                | 0              | -4.193358               | -1.041819 | 1.600338  |

|    |   |   |           |           |           |
|----|---|---|-----------|-----------|-----------|
| 25 | 1 | 0 | -3.143724 | -2.680639 | 3.130050  |
| 26 | 1 | 0 | -0.751663 | -2.452422 | 3.737017  |
| 27 | 1 | 0 | 0.570899  | -0.551357 | 2.848806  |
| 28 | 1 | 0 | -0.463953 | 1.070426  | 1.334396  |
| 29 | 6 | 0 | -2.258560 | 2.675045  | -0.084532 |
| 30 | 6 | 0 | -2.893004 | 3.855606  | 0.302041  |
| 31 | 6 | 0 | -2.221715 | 5.067705  | 0.207242  |
| 32 | 6 | 0 | -0.916493 | 5.105703  | -0.268416 |
| 33 | 6 | 0 | -0.280172 | 3.933071  | -0.658837 |
| 34 | 6 | 0 | -0.952011 | 2.721472  | -0.575375 |
| 35 | 1 | 0 | -3.912517 | 3.807902  | 0.668266  |
| 36 | 1 | 0 | -2.718497 | 5.983266  | 0.507233  |
| 37 | 1 | 0 | -0.391767 | 6.052208  | -0.335307 |
| 38 | 1 | 0 | 0.741773  | 3.949073  | -1.016922 |
| 39 | 1 | 0 | -0.437339 | 1.817454  | -0.883364 |
| 40 | 1 | 0 | -0.103685 | -0.957892 | -0.907132 |
| 41 | 8 | 0 | 0.821500  | -0.620299 | -0.865714 |
| 42 | 6 | 0 | 1.552660  | -1.508628 | -0.219506 |
| 43 | 8 | 0 | 1.147483  | -2.562903 | 0.205496  |
| 44 | 6 | 0 | 3.002007  | -1.123778 | -0.132645 |
| 45 | 6 | 0 | 3.484213  | 0.182101  | -0.193758 |
| 46 | 6 | 0 | 4.833819  | 0.469698  | -0.234185 |
| 47 | 6 | 0 | 5.716338  | -0.593867 | -0.170265 |
| 48 | 6 | 0 | 5.290351  | -1.906605 | -0.078269 |
| 49 | 6 | 0 | 3.927636  | -2.160849 | -0.066327 |
| 50 | 7 | 0 | 2.573272  | 1.340464  | -0.144355 |
| 51 | 8 | 0 | 1.853019  | 1.419720  | 0.825136  |
| 52 | 8 | 0 | 2.652466  | 2.141483  | -1.048812 |
| 53 | 7 | 0 | 7.168449  | -0.306778 | -0.198180 |
| 54 | 8 | 0 | 7.501643  | 0.856361  | -0.262500 |
| 55 | 8 | 0 | 7.920114  | -1.255792 | -0.154731 |
| 56 | 1 | 0 | 5.195587  | 1.486683  | -0.298973 |
| 57 | 1 | 0 | 6.018487  | -2.704182 | -0.027816 |
| 58 | 1 | 0 | 3.554205  | -3.175520 | -0.014219 |

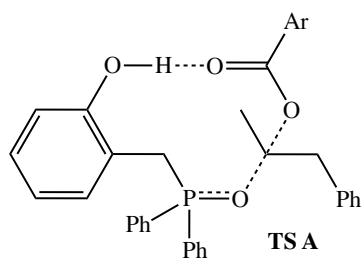

| Center<br>Number | Atomic<br>Number | Atomic<br>Type | Coordinates (Angstroms) |           |           |
|------------------|------------------|----------------|-------------------------|-----------|-----------|
|                  |                  |                | X                       | Y         | Z         |
| 1                | 1                | 0              | 0.601286                | 3.696082  | -0.216511 |
| 2                | 6                | 0              | -0.476501               | 3.773338  | -0.307225 |
| 3                | 6                | 0              | -3.244928               | 3.909013  | -0.519040 |
| 4                | 6                | 0              | -1.168894               | 4.847961  | 0.235229  |
| 5                | 6                | 0              | -1.177834               | 2.768256  | -0.964363 |
| 6                | 6                | 0              | -2.574468               | 2.816507  | -1.053307 |
| 7                | 6                | 0              | -2.551136               | 4.929409  | 0.120968  |
| 8                | 1                | 0              | -0.619642               | 5.627984  | 0.750139  |
| 9                | 1                | 0              | -3.086826               | 5.774253  | 0.536726  |
| 10               | 1                | 0              | -4.328041               | 3.951154  | -0.587007 |
| 11               | 6                | 0              | -3.296549               | 1.638180  | -1.648020 |
| 12               | 1                | 0              | -2.947270               | 1.422023  | -2.661972 |
| 13               | 1                | 0              | -4.368875               | 1.838440  | -1.688607 |
| 14               | 15               | 0              | -3.029139               | 0.047919  | -0.728902 |
| 15               | 6                | 0              | -2.357274               | 0.504753  | 0.889532  |
| 16               | 6                | 0              | -1.308425               | 1.480115  | 3.274319  |
| 17               | 6                | 0              | -3.117634               | 1.355851  | 1.697418  |
| 18               | 6                | 0              | -1.078862               | 0.136624  | 1.294669  |
| 19               | 6                | 0              | -0.552989               | 0.626633  | 2.483677  |
| 20               | 6                | 0              | -2.595939               | 1.838198  | 2.885980  |
| 21               | 1                | 0              | -4.115320               | 1.654266  | 1.392580  |
| 22               | 1                | 0              | -0.475933               | -0.532088 | 0.699469  |
| 23               | 1                | 0              | 0.456448                | 0.351020  | 2.763218  |
| 24               | 1                | 0              | -3.187195               | 2.505860  | 3.501469  |



|    |   |   |           |           |           |
|----|---|---|-----------|-----------|-----------|
| 25 | 1 | 0 | -0.893051 | 1.872759  | 4.195501  |
| 26 | 6 | 0 | -4.673427 | -0.650677 | -0.389129 |
| 27 | 6 | 0 | -7.109982 | -1.931606 | 0.043399  |
| 28 | 6 | 0 | -4.899897 | -1.347625 | 0.798602  |
| 29 | 6 | 0 | -5.671322 | -0.613968 | -1.364063 |
| 30 | 6 | 0 | -6.886346 | -1.248879 | -1.146452 |
| 31 | 6 | 0 | -6.115932 | -1.983053 | 1.012831  |
| 32 | 1 | 0 | -4.124843 | -1.390631 | 1.555708  |
| 33 | 1 | 0 | -5.503051 | -0.097272 | -2.303208 |
| 34 | 1 | 0 | -7.657889 | -1.212440 | -1.906671 |
| 35 | 1 | 0 | -6.286992 | -2.518291 | 1.939640  |
| 36 | 1 | 0 | -8.059522 | -2.426050 | 0.213555  |
| 37 | 1 | 0 | -2.488988 | -3.367636 | -0.230527 |
| 38 | 6 | 0 | -1.612610 | -3.295940 | 0.404099  |
| 39 | 6 | 0 | 0.621493  | -3.041237 | 2.030533  |
| 40 | 6 | 0 | -0.377789 | -2.995462 | -0.168382 |
| 41 | 6 | 0 | -1.730111 | -3.464217 | 1.777167  |
| 42 | 6 | 0 | -0.613955 | -3.330112 | 2.595220  |
| 43 | 6 | 0 | 0.739906  | -2.881980 | 0.655159  |
| 44 | 1 | 0 | -2.697745 | -3.694259 | 2.210236  |
| 45 | 1 | 0 | -0.707915 | -3.447305 | 3.668815  |
| 46 | 1 | 0 | 1.496204  | -2.921806 | 2.658569  |
| 47 | 6 | 0 | -0.243683 | -1.266418 | -1.993523 |
| 48 | 1 | 0 | 1.700034  | -2.631842 | 0.219131  |
| 49 | 6 | 0 | -0.341441 | -0.846659 | -3.415059 |
| 50 | 1 | 0 | 0.497087  | -1.276993 | -3.965205 |
| 51 | 1 | 0 | -0.325095 | 0.237520  | -3.498686 |
| 52 | 1 | 0 | -1.270223 | -1.238394 | -3.833163 |
| 53 | 6 | 0 | -0.266863 | -2.719570 | -1.645952 |
| 54 | 1 | 0 | 0.657114  | -3.139806 | -2.053846 |
| 55 | 1 | 0 | -1.096526 | -3.172934 | -2.193813 |
| 56 | 1 | 0 | -0.099969 | -0.529517 | -1.232201 |
| 57 | 8 | 0 | -2.247646 | -0.975811 | -1.536091 |
| 58 | 8 | 0 | -0.593532 | 1.693831  | -1.522500 |

|    |   |   |          |           |           |
|----|---|---|----------|-----------|-----------|
| 59 | 6 | 0 | 4.327113 | 0.186160  | 0.410538  |
| 60 | 6 | 0 | 6.143364 | -0.520560 | -1.538507 |
| 61 | 6 | 0 | 5.673093 | 0.274289  | 0.703016  |
| 62 | 6 | 0 | 3.849342 | -0.215912 | -0.833303 |
| 63 | 6 | 0 | 4.782355 | -0.581126 | -1.798171 |
| 64 | 6 | 0 | 6.564483 | -0.087289 | -0.292442 |
| 65 | 1 | 0 | 6.024539 | 0.603262  | 1.671088  |
| 66 | 1 | 0 | 4.420179 | -0.909722 | -2.763921 |
| 67 | 1 | 0 | 6.878135 | -0.796189 | -2.282429 |
| 68 | 7 | 0 | 8.009954 | -0.012894 | -0.005442 |
| 69 | 8 | 0 | 8.341069 | 0.347495  | 1.104615  |
| 70 | 8 | 0 | 8.772335 | -0.317097 | -0.898683 |
| 71 | 7 | 0 | 3.389892 | 0.467418  | 1.512221  |
| 72 | 8 | 0 | 2.544695 | -0.376357 | 1.733549  |
| 73 | 8 | 0 | 3.561115 | 1.479745  | 2.151725  |
| 74 | 6 | 0 | 2.373799 | -0.151033 | -1.196715 |
| 75 | 8 | 0 | 1.942325 | -1.101239 | -1.890695 |
| 76 | 8 | 0 | 1.771147 | 0.857626  | -0.789360 |
| 77 | 1 | 0 | 0.335052 | 1.530778  | -1.224682 |

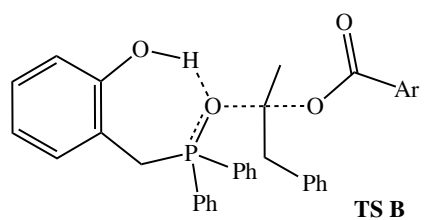

| Center<br>Number | Atomic<br>Number | Atomic<br>Type | Coordinates (Angstroms) |           |           |
|------------------|------------------|----------------|-------------------------|-----------|-----------|
|                  |                  |                | X                       | Y         | Z         |
| 1                | 15               | 0              | -1.998693               | -0.824334 | -0.418609 |
| 2                | 8                | 0              | -1.898640               | 0.701844  | -0.262295 |

|    |   |   |           |           |           |
|----|---|---|-----------|-----------|-----------|
| 3  | 6 | 0 | -1.297239 | -1.644240 | 1.055029  |
| 4  | 6 | 0 | -2.197431 | -1.609648 | 2.267820  |
| 5  | 6 | 0 | -2.680092 | -2.809310 | 2.791020  |
| 6  | 6 | 0 | -3.458302 | -2.846955 | 3.937178  |
| 7  | 6 | 0 | -3.766010 | -1.657634 | 4.586949  |
| 8  | 6 | 0 | -3.314749 | -0.452004 | 4.076983  |
| 9  | 6 | 0 | -2.544796 | -0.415595 | 2.916798  |
| 10 | 8 | 0 | -2.144568 | 0.807504  | 2.483887  |
| 11 | 1 | 0 | -2.031673 | 0.818214  | 1.517682  |
| 12 | 1 | 0 | -3.552864 | 0.489498  | 4.556977  |
| 13 | 1 | 0 | -4.367080 | -1.666683 | 5.488987  |
| 14 | 1 | 0 | -3.811579 | -3.795018 | 4.323973  |
| 15 | 1 | 0 | -2.420017 | -3.737122 | 2.291087  |
| 16 | 1 | 0 | -0.327602 | -1.160825 | 1.237536  |
| 17 | 1 | 0 | -1.081620 | -2.680306 | 0.784547  |
| 18 | 6 | 0 | -3.743996 | -1.261799 | -0.513816 |
| 19 | 6 | 0 | -4.693994 | -0.244846 | -0.471429 |
| 20 | 6 | 0 | -6.045379 | -0.569097 | -0.491130 |
| 21 | 6 | 0 | -6.441304 | -1.898701 | -0.546832 |
| 22 | 6 | 0 | -5.490328 | -2.914260 | -0.586975 |
| 23 | 6 | 0 | -4.141090 | -2.598390 | -0.570684 |
| 24 | 1 | 0 | -4.366721 | 0.788203  | -0.425244 |
| 25 | 1 | 0 | -6.788272 | 0.219094  | -0.459548 |
| 26 | 1 | 0 | -7.496084 | -2.148420 | -0.557525 |
| 27 | 1 | 0 | -5.802437 | -3.950989 | -0.628422 |
| 28 | 1 | 0 | -3.399863 | -3.390285 | -0.605825 |
| 29 | 6 | 0 | -1.165902 | -1.502768 | -1.864080 |
| 30 | 6 | 0 | -1.884152 | -1.724582 | -3.041931 |
| 31 | 6 | 0 | -1.234840 | -2.227407 | -4.159852 |
| 32 | 6 | 0 | 0.125424  | -2.509842 | -4.103915 |
| 33 | 6 | 0 | 0.844446  | -2.281598 | -2.936988 |
| 34 | 6 | 0 | 0.205103  | -1.773279 | -1.813617 |
| 35 | 1 | 0 | -2.946478 | -1.511720 | -3.083229 |
| 36 | 1 | 0 | -1.791395 | -2.400205 | -5.073539 |

|    |   |   |           |           |           |
|----|---|---|-----------|-----------|-----------|
| 37 | 1 | 0 | 0.630550  | -2.905564 | -4.977728 |
| 38 | 1 | 0 | 1.909137  | -2.472951 | -2.896985 |
| 39 | 1 | 0 | 0.786907  | -1.560466 | -0.920010 |
| 40 | 6 | 0 | -0.104639 | 1.722568  | -0.216146 |
| 41 | 6 | 0 | 0.141645  | 1.806488  | -1.676365 |
| 42 | 1 | 0 | -0.783780 | 2.068277  | -2.192047 |
| 43 | 1 | 0 | 0.550342  | 0.877515  | -2.067941 |
| 44 | 1 | 0 | 0.866693  | 2.605157  | -1.847346 |
| 45 | 1 | 0 | 0.239913  | 0.864487  | 0.328441  |
| 46 | 6 | 0 | -0.560440 | 2.922783  | 0.554520  |
| 47 | 6 | 0 | -1.693615 | 3.705651  | -0.067280 |
| 48 | 1 | 0 | -0.799265 | 2.630164  | 1.577112  |
| 49 | 1 | 0 | 0.340784  | 3.541707  | 0.611184  |
| 50 | 6 | 0 | -1.457475 | 4.634915  | -1.078143 |
| 51 | 6 | 0 | -2.507926 | 5.336060  | -1.658305 |
| 52 | 6 | 0 | -3.809997 | 5.123617  | -1.224285 |
| 53 | 6 | 0 | -4.053123 | 4.212117  | -0.203177 |
| 54 | 6 | 0 | -3.002382 | 3.508522  | 0.370457  |
| 55 | 1 | 0 | -0.441067 | 4.816158  | -1.412762 |
| 56 | 1 | 0 | -2.306521 | 6.055352  | -2.444075 |
| 57 | 1 | 0 | -4.630108 | 5.673401  | -1.671913 |
| 58 | 1 | 0 | -5.064929 | 4.052408  | 0.153145  |
| 59 | 1 | 0 | -3.195192 | 2.801382  | 1.169826  |
| 60 | 8 | 0 | 2.125917  | 1.915489  | 0.292747  |
| 61 | 6 | 0 | 2.527573  | 0.738799  | 0.432754  |
| 62 | 8 | 0 | 1.858432  | -0.302174 | 0.563942  |
| 63 | 6 | 0 | 4.039284  | 0.556921  | 0.501342  |
| 64 | 6 | 0 | 4.710531  | -0.388787 | -0.266854 |
| 65 | 6 | 0 | 6.054770  | -0.666911 | -0.117595 |
| 66 | 6 | 0 | 6.749994  | 0.062956  | 0.830209  |
| 67 | 6 | 0 | 6.137828  | 1.035461  | 1.605615  |
| 68 | 6 | 0 | 4.783622  | 1.275605  | 1.432201  |
| 69 | 7 | 0 | 3.992997  | -1.094950 | -1.338991 |
| 70 | 8 | 0 | 3.246964  | -0.433173 | -2.029730 |

|    |   |   |          |           |           |
|----|---|---|----------|-----------|-----------|
| 71 | 8 | 0 | 4.221859 | -2.277958 | -1.489439 |
| 72 | 1 | 0 | 6.550080 | -1.417081 | -0.717923 |
| 73 | 7 | 0 | 8.189200 | -0.201710 | 1.008059  |
| 74 | 8 | 0 | 8.695890 | -1.042820 | 0.294835  |
| 75 | 8 | 0 | 8.774733 | 0.438475  | 1.856560  |
| 76 | 1 | 0 | 6.724059 | 1.584031  | 2.330048  |
| 77 | 1 | 0 | 4.280251 | 2.027864  | 2.026260  |

## 2. GS B Structures for analogs (needed to calculate values for Table 2)

For **1a** (see section 1, above)

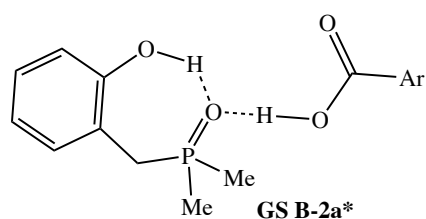

| Center<br>Number | Atomic<br>Number | Atomic<br>Type | Coordinates (Angstroms) |           |           |
|------------------|------------------|----------------|-------------------------|-----------|-----------|
|                  |                  |                | X                       | Y         | Z         |
| 1                | 6                | 0              | -5.394651               | 0.143982  | -1.407232 |
| 2                | 6                | 0              | -4.168708               | 0.414158  | -0.799356 |
| 3                | 6                | 0              | -3.984902               | 1.661782  | -0.179437 |
| 4                | 6                | 0              | -5.004429               | 2.611555  | -0.228867 |
| 5                | 6                | 0              | -6.207360               | 2.327617  | -0.854458 |
| 6                | 1                | 0              | -5.538900               | -0.819615 | -1.887058 |
| 7                | 1                | 0              | -4.826303               | 3.568867  | 0.245829  |
| 8                | 1                | 0              | -6.989163               | 3.078308  | -0.878015 |
| 9                | 6                | 0              | -3.055971               | -0.604205 | -0.855612 |
| 10               | 1                | 0              | -2.107140               | -0.151691 | -1.161608 |
| 11               | 1                | 0              | -3.297636               | -1.394087 | -1.571818 |
| 12               | 8                | 0              | -2.832749               | 2.012599  | 0.438110  |

|    |    |   |           |           |           |
|----|----|---|-----------|-----------|-----------|
| 13 | 1  | 0 | -2.464578 | 1.253150  | 0.923654  |
| 14 | 15 | 0 | -2.702315 | -1.368122 | 0.755423  |
| 15 | 8  | 0 | -2.095432 | -0.339850 | 1.703627  |
| 16 | 6  | 0 | 0.880346  | -0.005362 | 0.533411  |
| 17 | 8  | 0 | 0.216431  | -0.266553 | -0.442578 |
| 18 | 8  | 0 | 0.438337  | 0.154554  | 1.753617  |
| 19 | 1  | 0 | -0.553216 | -0.018434 | 1.776291  |
| 20 | 6  | 0 | 2.362329  | 0.231789  | 0.419800  |
| 21 | 6  | 0 | 3.185213  | -0.608803 | -0.324670 |
| 22 | 6  | 0 | 2.918511  | 1.383998  | 0.965191  |
| 23 | 6  | 0 | 4.513877  | -0.321289 | -0.563615 |
| 24 | 6  | 0 | 4.253786  | 1.696542  | 0.754837  |
| 25 | 1  | 0 | 2.290187  | 2.042079  | 1.551380  |
| 26 | 6  | 0 | 5.024770  | 0.839526  | -0.010679 |
| 27 | 1  | 0 | 5.135259  | -0.979745 | -1.154270 |
| 28 | 1  | 0 | 4.699826  | 2.590145  | 1.169208  |
| 29 | 7  | 0 | 2.676429  | -1.895887 | -0.836641 |
| 30 | 8  | 0 | 3.072185  | -2.253965 | -1.922756 |
| 31 | 8  | 0 | 1.932152  | -2.521411 | -0.110422 |
| 32 | 7  | 0 | 6.448168  | 1.164539  | -0.243250 |
| 33 | 8  | 0 | 7.097379  | 0.378911  | -0.899312 |
| 34 | 8  | 0 | 6.867590  | 2.194898  | 0.238353  |
| 35 | 6  | 0 | -4.264494 | -2.003346 | 1.398382  |
| 36 | 1  | 0 | -4.085402 | -2.501999 | 2.352176  |
| 37 | 1  | 0 | -4.712186 | -2.707554 | 0.693743  |
| 38 | 1  | 0 | -4.947851 | -1.166706 | 1.550945  |
| 39 | 6  | 0 | -1.631129 | -2.791115 | 0.464310  |
| 40 | 1  | 0 | -1.350364 | -3.229796 | 1.423743  |
| 41 | 1  | 0 | -0.729209 | -2.464920 | -0.055467 |
| 42 | 1  | 0 | -2.150012 | -3.541469 | -0.135983 |
| 43 | 6  | 0 | -6.414507 | 1.083155  | -1.438435 |
| 44 | 1  | 0 | -7.354005 | 0.851370  | -1.925394 |

---

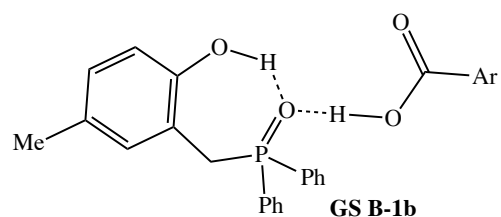

| Center<br>Number | Atomic<br>Number | Atomic<br>Type | Coordinates (Angstroms) |           |           |
|------------------|------------------|----------------|-------------------------|-----------|-----------|
|                  |                  |                | X                       | Y         | Z         |
| 1                | 6                | 0              | 4.471498                | -0.865379 | -1.263758 |
| 2                | 6                | 0              | 3.412175                | -1.314419 | -0.477648 |
| 3                | 6                | 0              | 3.684440                | -2.140462 | 0.621665  |
| 4                | 6                | 0              | 4.996996                | -2.542037 | 0.857570  |
| 5                | 6                | 0              | 6.029562                | -2.098663 | 0.047723  |
| 6                | 1                | 0              | 4.253828                | -0.203223 | -2.097903 |
| 7                | 1                | 0              | 5.183837                | -3.198723 | 1.698772  |
| 8                | 1                | 0              | 7.044693                | -2.420997 | 0.257755  |
| 9                | 6                | 0              | 2.001436                | -0.887662 | -0.801954 |
| 10               | 1                | 0              | 1.287178                | -1.708812 | -0.684200 |
| 11               | 1                | 0              | 1.942851                | -0.509655 | -1.825044 |
| 12               | 8                | 0              | 2.717184                | -2.601781 | 1.452280  |
| 13               | 1                | 0              | 2.083179                | -1.890868 | 1.640333  |
| 14               | 15               | 0              | 1.473432                | 0.413313  | 0.356255  |
| 15               | 8                | 0              | 1.347790                | -0.165297 | 1.758512  |
| 16               | 6                | 0              | -0.056381               | 1.174281  | -0.252377 |
| 17               | 6                | 0              | -0.788196               | 0.632575  | -1.308283 |
| 18               | 6                | 0              | -0.542320               | 2.298688  | 0.421329  |
| 19               | 6                | 0              | -1.993000               | 1.212260  | -1.689257 |
| 20               | 1                | 0              | -0.454313               | -0.265321 | -1.813447 |
| 21               | 6                | 0              | -1.745483               | 2.872490  | 0.039268  |
| 22               | 1                | 0              | 0.021251                | 2.720890  | 1.246713  |
| 23               | 6                | 0              | -2.470348               | 2.329481  | -1.017569 |
| 24               | 1                | 0              | -2.561695               | 0.767620  | -2.496569 |
| 25               | 1                | 0              | -2.119105               | 3.743153  | 0.565473  |

|    |   |   |           |           |           |
|----|---|---|-----------|-----------|-----------|
| 26 | 1 | 0 | -3.412705 | 2.777047  | -1.312938 |
| 27 | 6 | 0 | 2.749782  | 1.687087  | 0.286326  |
| 28 | 6 | 0 | 3.784900  | 1.633595  | 1.218311  |
| 29 | 6 | 0 | 2.786569  | 2.618122  | -0.751184 |
| 30 | 6 | 0 | 4.853729  | 2.512573  | 1.110779  |
| 31 | 1 | 0 | 3.747303  | 0.900692  | 2.015952  |
| 32 | 6 | 0 | 3.858176  | 3.494415  | -0.853840 |
| 33 | 1 | 0 | 1.977829  | 2.664871  | -1.473454 |
| 34 | 6 | 0 | 4.891438  | 3.438736  | 0.075168  |
| 35 | 1 | 0 | 5.660336  | 2.469897  | 1.832992  |
| 36 | 1 | 0 | 3.886606  | 4.221634  | -1.656842 |
| 37 | 1 | 0 | 5.728698  | 4.122406  | -0.008139 |
| 38 | 6 | 0 | -1.595474 | -1.184715 | 1.259811  |
| 39 | 8 | 0 | -0.940432 | -1.868806 | 0.511583  |
| 40 | 8 | 0 | -1.146111 | -0.616797 | 2.358664  |
| 41 | 1 | 0 | -0.149916 | -0.581104 | 2.306331  |
| 42 | 6 | 0 | -3.014322 | -0.804128 | 0.948623  |
| 43 | 6 | 0 | -3.666020 | -1.316825 | -0.170062 |
| 44 | 6 | 0 | -3.653114 | 0.194315  | 1.679440  |
| 45 | 6 | 0 | -4.897291 | -0.850923 | -0.583803 |
| 46 | 6 | 0 | -4.899754 | 0.669721  | 1.305174  |
| 47 | 1 | 0 | -3.141670 | 0.610866  | 2.536024  |
| 48 | 6 | 0 | -5.494663 | 0.140447  | 0.174342  |
| 49 | 1 | 0 | -5.385742 | -1.239018 | -1.467101 |
| 50 | 1 | 0 | -5.403283 | 1.447656  | 1.861704  |
| 51 | 7 | 0 | -3.072919 | -2.385297 | -1.001143 |
| 52 | 8 | 0 | -3.097918 | -3.502913 | -0.551451 |
| 53 | 8 | 0 | -2.675157 | -2.055134 | -2.099658 |
| 54 | 7 | 0 | -6.809027 | 0.661962  | -0.259145 |
| 55 | 8 | 0 | -7.309462 | 0.161238  | -1.243345 |
| 56 | 8 | 0 | -7.294038 | 1.558897  | 0.396675  |
| 57 | 6 | 0 | 6.913933  | -0.698028 | -1.865442 |
| 58 | 1 | 0 | 7.758759  | -1.389960 | -1.888180 |
| 59 | 1 | 0 | 7.277418  | 0.256216  | -1.470288 |



|    |   |   |          |           |           |
|----|---|---|----------|-----------|-----------|
| 60 | 1 | 0 | 6.591558 | -0.526168 | -2.895098 |
| 61 | 6 | 0 | 5.788462 | -1.235660 | -1.020475 |

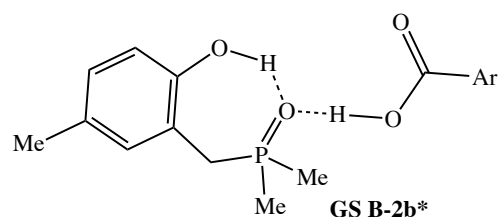

| Center<br>Number | Atomic<br>Number | Atomic<br>Type | Coordinates (Angstroms) |           |           |
|------------------|------------------|----------------|-------------------------|-----------|-----------|
|                  |                  |                | X                       | Y         | Z         |
| 1                | 6                | 0              | -5.147039               | -0.103274 | 1.131714  |
| 2                | 6                | 0              | -3.897642               | -0.366358 | 0.566874  |
| 3                | 6                | 0              | -3.698637               | -1.587730 | -0.091534 |
| 4                | 6                | 0              | -4.734425               | -2.520569 | -0.119458 |
| 5                | 6                | 0              | -5.956430               | -2.241203 | 0.465656  |
| 6                | 1                | 0              | -5.295372               | 0.845833  | 1.640958  |
| 7                | 1                | 0              | -4.553000               | -3.464127 | -0.620026 |
| 8                | 1                | 0              | -6.746834               | -2.984466 | 0.426807  |
| 9                | 6                | 0              | -2.780204               | 0.638363  | 0.707636  |
| 10               | 1                | 0              | -1.847288               | 0.164590  | 1.029686  |
| 11               | 1                | 0              | -3.042005               | 1.401906  | 1.445024  |
| 12               | 8                | 0              | -2.522805               | -1.932235 | -0.671282 |
| 13               | 1                | 0              | -2.136568               | -1.162931 | -1.125199 |
| 14               | 15               | 0              | -2.362690               | 1.460311  | -0.858759 |
| 15               | 8                | 0              | -1.731269               | 0.465147  | -1.825956 |
| 16               | 6                | 0              | 1.197362                | 0.047854  | -0.565741 |
| 17               | 8                | 0              | 0.506913                | 0.293986  | 0.395642  |
| 18               | 8                | 0              | 0.793228                | -0.068356 | -1.803712 |
| 19               | 1                | 0              | -0.194138               | 0.123800  | -1.853928 |
| 20               | 6                | 0              | 2.670242                | -0.221533 | -0.411111 |

|    |   |   |           |           |           |
|----|---|---|-----------|-----------|-----------|
| 21 | 6 | 0 | 3.484477  | 0.582549  | 0.381611  |
| 22 | 6 | 0 | 3.221751  | -1.369820 | -0.969503 |
| 23 | 6 | 0 | 4.799116  | 0.262554  | 0.654591  |
| 24 | 6 | 0 | 4.543340  | -1.714254 | -0.725412 |
| 25 | 1 | 0 | 2.600208  | -1.999602 | -1.592823 |
| 26 | 6 | 0 | 5.305425  | -0.893115 | 0.086934  |
| 27 | 1 | 0 | 5.413538  | 0.892765  | 1.282159  |
| 28 | 1 | 0 | 4.985772  | -2.605257 | -1.149207 |
| 29 | 7 | 0 | 2.984120  | 1.865412  | 0.912358  |
| 30 | 8 | 0 | 3.353011  | 2.186955  | 2.019266  |
| 31 | 8 | 0 | 2.274230  | 2.524170  | 0.181275  |
| 32 | 7 | 0 | 6.714098  | -1.252371 | 0.355422  |
| 33 | 8 | 0 | 7.356756  | -0.497705 | 1.053004  |
| 34 | 8 | 0 | 7.129206  | -2.277584 | -0.140760 |
| 35 | 6 | 0 | -3.896157 | 2.135111  | -1.530339 |
| 36 | 1 | 0 | -3.679589 | 2.668464  | -2.457197 |
| 37 | 1 | 0 | -4.362314 | 2.815768  | -0.814615 |
| 38 | 1 | 0 | -4.580514 | 1.311413  | -1.738565 |
| 39 | 6 | 0 | -1.291144 | 2.861478  | -0.476120 |
| 40 | 1 | 0 | -0.977054 | 3.336553  | -1.407469 |
| 41 | 1 | 0 | -0.408639 | 2.506189  | 0.057706  |
| 42 | 1 | 0 | -1.823364 | 3.590970  | 0.138067  |
| 43 | 6 | 0 | -7.531404 | -0.709375 | 1.711692  |
| 44 | 1 | 0 | -7.831865 | -1.491838 | 2.413792  |
| 45 | 1 | 0 | -8.311491 | -0.637753 | 0.947706  |
| 46 | 1 | 0 | -7.510132 | 0.237283  | 2.255635  |
| 47 | 6 | 0 | -6.192079 | -1.017433 | 1.093939  |

---

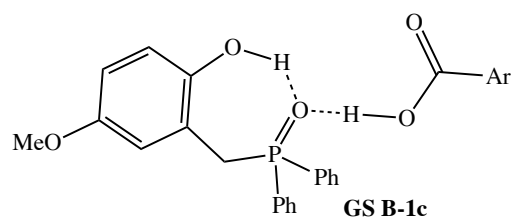

| Center<br>Number | Atomic<br>Number | Atomic<br>Type | Coordinates (Angstroms) |           |           |
|------------------|------------------|----------------|-------------------------|-----------|-----------|
|                  |                  |                | X                       | Y         | Z         |
| 1                | 6                | 0              | 5.606811                | -1.125077 | -0.832151 |
| 2                | 6                | 0              | 4.290821                | -0.776370 | -1.121795 |
| 3                | 6                | 0              | 3.235505                | -1.218715 | -0.336047 |
| 4                | 6                | 0              | 3.502190                | -2.002243 | 0.799104  |
| 5                | 6                | 0              | 4.814849                | -2.359188 | 1.073418  |
| 6                | 6                | 0              | 5.866786                | -1.935247 | 0.269035  |
| 7                | 1                | 0              | 4.107237                | -0.150135 | -1.987853 |
| 8                | 1                | 0              | 5.002151                | -2.976582 | 1.943619  |
| 9                | 1                | 0              | 6.875000                | -2.236465 | 0.521294  |
| 10               | 6                | 0              | 1.821964                | -0.834477 | -0.697164 |
| 11               | 1                | 0              | 1.128607                | -1.671606 | -0.567437 |
| 12               | 1                | 0              | 1.773220                | -0.486570 | -1.731192 |
| 13               | 8                | 0              | 2.520636                | -2.462711 | 1.619070  |
| 14               | 1                | 0              | 1.890301                | -1.747127 | 1.801368  |
| 15               | 15               | 0              | 1.233890                | 0.483397  | 0.412696  |
| 16               | 8                | 0              | 1.091071                | -0.055131 | 1.829140  |
| 17               | 6                | 0              | -0.301520               | 1.179099  | -0.257745 |
| 18               | 6                | 0              | -0.987692               | 0.584203  | -1.315685 |
| 19               | 6                | 0              | -0.837260               | 2.310008  | 0.365410  |
| 20               | 6                | 0              | -2.196020               | 1.117447  | -1.749215 |
| 21               | 1                | 0              | -0.614771               | -0.318872 | -1.782670 |
| 22               | 6                | 0              | -2.044095               | 2.837337  | -0.068801 |
| 23               | 1                | 0              | -0.309145               | 2.774196  | 1.191695  |
| 24               | 6                | 0              | -2.722812               | 2.241430  | -1.127739 |
| 25               | 1                | 0              | -2.728842               | 0.631795  | -2.557299 |

|    |   |   |           |           |           |
|----|---|---|-----------|-----------|-----------|
| 26 | 1 | 0 | -2.456321 | 3.713362  | 0.418241  |
| 27 | 1 | 0 | -3.667676 | 2.653321  | -1.464137 |
| 28 | 6 | 0 | 2.470731  | 1.794266  | 0.335629  |
| 29 | 6 | 0 | 3.472268  | 1.814852  | 1.304743  |
| 30 | 6 | 0 | 2.508919  | 2.689042  | -0.733217 |
| 31 | 6 | 0 | 4.508542  | 2.732665  | 1.203050  |
| 32 | 1 | 0 | 3.433264  | 1.109865  | 2.127118  |
| 33 | 6 | 0 | 3.548112  | 3.603818  | -0.829810 |
| 34 | 1 | 0 | 1.725979  | 2.677936  | -1.484737 |
| 35 | 6 | 0 | 4.547519  | 3.622914  | 0.136718  |
| 36 | 1 | 0 | 5.289357  | 2.748277  | 1.954153  |
| 37 | 1 | 0 | 3.578382  | 4.301879  | -1.658126 |
| 38 | 1 | 0 | 5.360366  | 4.335777  | 0.057455  |
| 39 | 6 | 0 | -1.820230 | -1.160746 | 1.296859  |
| 40 | 8 | 0 | -1.138444 | -1.851383 | 0.579513  |
| 41 | 8 | 0 | -1.403185 | -0.556306 | 2.389222  |
| 42 | 1 | 0 | -0.407358 | -0.500319 | 2.354713  |
| 43 | 6 | 0 | -3.238868 | -0.812288 | 0.948291  |
| 44 | 6 | 0 | -3.862965 | -1.369130 | -0.165061 |
| 45 | 6 | 0 | -3.903438 | 0.200976  | 1.634298  |
| 46 | 6 | 0 | -5.091301 | -0.931816 | -0.616982 |
| 47 | 6 | 0 | -5.148365 | 0.648295  | 1.221698  |
| 48 | 1 | 0 | -3.412860 | 0.651020  | 2.486125  |
| 49 | 6 | 0 | -5.714920 | 0.075805  | 0.097448  |
| 50 | 1 | 0 | -5.557765 | -1.353983 | -1.496513 |
| 51 | 1 | 0 | -5.672096 | 1.437412  | 1.742804  |
| 52 | 7 | 0 | -3.242405 | -2.458479 | -0.947368 |
| 53 | 8 | 0 | -3.251606 | -3.557588 | -0.453389 |
| 54 | 8 | 0 | -2.839325 | -2.165199 | -2.054321 |
| 55 | 7 | 0 | -7.026594 | 0.567090  | -0.376988 |
| 56 | 8 | 0 | -7.502959 | 0.028662  | -1.353209 |
| 57 | 8 | 0 | -7.533928 | 1.479137  | 0.240058  |
| 58 | 6 | 0 | 7.895360  | -0.970987 | -1.430266 |
| 59 | 1 | 0 | 8.056563  | -2.054453 | -1.481905 |

|    |   |   |          |           |           |
|----|---|---|----------|-----------|-----------|
| 60 | 1 | 0 | 8.229352 | -0.603549 | -0.452300 |
| 61 | 1 | 0 | 8.478571 | -0.486256 | -2.211542 |
| 62 | 8 | 0 | 6.551213 | -0.633903 | -1.679454 |

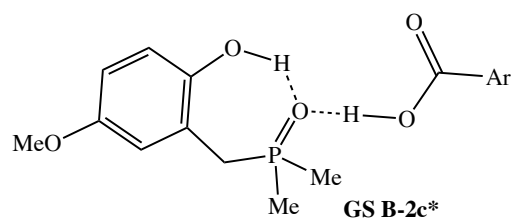

| Center<br>Number | Atomic<br>Number | Atomic<br>Type | Coordinates (Angstroms) |           |           |
|------------------|------------------|----------------|-------------------------|-----------|-----------|
|                  |                  |                | X                       | Y         | Z         |
| 1                | 6                | 0              | 4.862603                | 0.036781  | -0.958865 |
| 2                | 6                | 0              | 3.604600                | -0.229906 | -0.434217 |
| 3                | 6                | 0              | 3.400960                | -1.419005 | 0.287664  |
| 4                | 6                | 0              | 4.452263                | -2.315306 | 0.415976  |
| 5                | 6                | 0              | 5.703736                | -2.053564 | -0.130649 |
| 6                | 1                | 0              | 5.043275                | 0.947046  | -1.520540 |
| 7                | 1                | 0              | 4.273326                | -3.232431 | 0.964033  |
| 8                | 1                | 0              | 6.494420                | -2.781477 | -0.005574 |
| 9                | 6                | 0              | 2.472976                | 0.740779  | -0.664012 |
| 10               | 1                | 0              | 1.557649                | 0.226313  | -0.972793 |
| 11               | 1                | 0              | 2.736559                | 1.463417  | -1.440583 |
| 12               | 8                | 0              | 2.197411                | -1.752755 | 0.826031  |
| 13               | 1                | 0              | 1.814607                | -0.977442 | 1.270997  |
| 14               | 15               | 0              | 2.009496                | 1.645552  | 0.843706  |
| 15               | 8                | 0              | 1.385876                | 0.699123  | 1.862979  |
| 16               | 6                | 0              | -1.503141               | 0.116476  | 0.573374  |
| 17               | 8                | 0              | -0.803879               | 0.336149  | -0.387923 |
| 18               | 8                | 0              | -1.119393               | 0.082304  | 1.822708  |
| 19               | 1                | 0              | -0.140565               | 0.312604  | 1.879793  |

|    |   |   |           |           |           |
|----|---|---|-----------|-----------|-----------|
| 20 | 6 | 0 | -2.961975 | -0.216151 | 0.408192  |
| 21 | 6 | 0 | -3.791889 | 0.518745  | -0.433755 |
| 22 | 6 | 0 | -3.479738 | -1.357616 | 1.011125  |
| 23 | 6 | 0 | -5.089002 | 0.137125  | -0.711415 |
| 24 | 6 | 0 | -4.783270 | -1.762684 | 0.763255  |
| 25 | 1 | 0 | -2.845908 | -1.934018 | 1.672585  |
| 26 | 6 | 0 | -5.561644 | -1.009345 | -0.097988 |
| 27 | 1 | 0 | -5.715024 | 0.714459  | -1.377152 |
| 28 | 1 | 0 | -5.199735 | -2.649191 | 1.221391  |
| 29 | 7 | 0 | -3.329850 | 1.793277  | -1.016606 |
| 30 | 8 | 0 | -3.696496 | 2.051966  | -2.140666 |
| 31 | 8 | 0 | -2.651420 | 2.508274  | -0.308920 |
| 32 | 7 | 0 | -6.951310 | -1.433890 | -0.370020 |
| 33 | 8 | 0 | -7.610090 | -0.737820 | -1.112084 |
| 34 | 8 | 0 | -7.336207 | -2.449730 | 0.168124  |
| 35 | 6 | 0 | 5.917876  | -0.861147 | -0.814727 |
| 36 | 6 | 0 | 3.515140  | 2.399217  | 1.493844  |
| 37 | 1 | 0 | 3.269455  | 2.986528  | 2.379942  |
| 38 | 1 | 0 | 3.978652  | 3.042515  | 0.742773  |
| 39 | 1 | 0 | 4.214673  | 1.607937  | 1.767065  |
| 40 | 6 | 0 | 0.912542  | 2.993268  | 0.355499  |
| 41 | 1 | 0 | 0.575167  | 3.521222  | 1.249480  |
| 42 | 1 | 0 | 0.045834  | 2.582983  | -0.164556 |
| 43 | 1 | 0 | 1.437236  | 3.692638  | -0.298880 |
| 44 | 6 | 0 | 8.184738  | -1.375680 | -1.282480 |
| 45 | 1 | 0 | 8.467061  | -1.555044 | -0.238152 |
| 46 | 1 | 0 | 9.014316  | -0.895769 | -1.798911 |
| 47 | 1 | 0 | 7.965923  | -2.334662 | -1.766947 |
| 48 | 8 | 0 | 7.096461  | -0.486081 | -1.380014 |

---

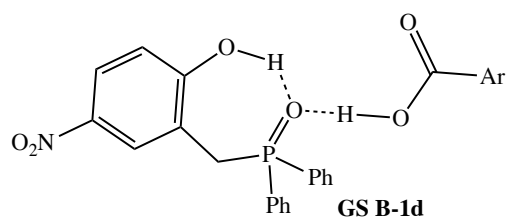

| Center<br>Number | Atomic<br>Number | Atomic<br>Type | Coordinates (Angstroms) |           |           |
|------------------|------------------|----------------|-------------------------|-----------|-----------|
|                  |                  |                | X                       | Y         | Z         |
| 1                | 6                | 0              | 4.158681                | -0.793004 | -0.976279 |
| 2                | 6                | 0              | 3.081658                | -1.219256 | -0.212447 |
| 3                | 6                | 0              | 3.326336                | -2.015422 | 0.923395  |
| 4                | 6                | 0              | 4.629599                | -2.433800 | 1.209461  |
| 5                | 6                | 0              | 5.692655                | -2.022737 | 0.431536  |
| 6                | 1                | 0              | 4.010068                | -0.153066 | -1.836623 |
| 7                | 1                | 0              | 4.780545                | -3.066129 | 2.075040  |
| 8                | 1                | 0              | 6.707408                | -2.322275 | 0.654571  |
| 9                | 6                | 0              | 1.682363                | -0.811422 | -0.600934 |
| 10               | 1                | 0              | 0.972953                | -1.639005 | -0.498755 |
| 11               | 1                | 0              | 1.666293                | -0.459455 | -1.634273 |
| 12               | 8                | 0              | 2.351788                | -2.424850 | 1.749905  |
| 13               | 1                | 0              | 1.668861                | -1.734796 | 1.839113  |
| 14               | 15               | 0              | 1.088312                | 0.508844  | 0.505572  |
| 15               | 8                | 0              | 0.920326                | -0.060169 | 1.908027  |
| 16               | 6                | 0              | -0.423620               | 1.223036  | -0.189451 |
| 17               | 6                | 0              | -1.103010               | 0.628787  | -1.252475 |
| 18               | 6                | 0              | -0.951036               | 2.366135  | 0.418460  |
| 19               | 6                | 0              | -2.298262               | 1.174559  | -1.705328 |
| 20               | 1                | 0              | -0.736849               | -0.282060 | -1.709709 |
| 21               | 6                | 0              | -2.146030               | 2.904411  | -0.034473 |
| 22               | 1                | 0              | -0.426666               | 2.831399  | 1.246535  |
| 23               | 6                | 0              | -2.818776               | 2.308948  | -1.097532 |
| 24               | 1                | 0              | -2.825210               | 0.691296  | -2.518675 |
| 25               | 1                | 0              | -2.552831               | 3.789564  | 0.440205  |

|    |   |   |           |           |           |
|----|---|---|-----------|-----------|-----------|
| 26 | 1 | 0 | -3.753809 | 2.730423  | -1.448967 |
| 27 | 6 | 0 | 2.356063  | 1.787723  | 0.461414  |
| 28 | 6 | 0 | 3.310120  | 1.808892  | 1.477225  |
| 29 | 6 | 0 | 2.480448  | 2.635409  | -0.639532 |
| 30 | 6 | 0 | 4.388602  | 2.678697  | 1.388593  |
| 31 | 1 | 0 | 3.201788  | 1.141644  | 2.324681  |
| 32 | 6 | 0 | 3.562554  | 3.499786  | -0.723509 |
| 33 | 1 | 0 | 1.733964  | 2.623730  | -1.427514 |
| 34 | 6 | 0 | 4.516877  | 3.517327  | 0.288083  |
| 35 | 1 | 0 | 5.133642  | 2.695381  | 2.175065  |
| 36 | 1 | 0 | 3.664321  | 4.157131  | -1.578682 |
| 37 | 1 | 0 | 5.365470  | 4.187650  | 0.215943  |
| 38 | 6 | 0 | -1.977147 | -1.144844 | 1.319489  |
| 39 | 8 | 0 | -1.267646 | -1.833895 | 0.626835  |
| 40 | 8 | 0 | -1.596256 | -0.536492 | 2.423367  |
| 41 | 1 | 0 | -0.601904 | -0.484759 | 2.420933  |
| 42 | 6 | 0 | -3.385683 | -0.805916 | 0.928743  |
| 43 | 6 | 0 | -3.971717 | -1.363463 | -0.204736 |
| 44 | 6 | 0 | -4.079727 | 0.196630  | 1.601321  |
| 45 | 6 | 0 | -5.192303 | -0.937872 | -0.687767 |
| 46 | 6 | 0 | -5.317275 | 0.632864  | 1.156092  |
| 47 | 1 | 0 | -3.618333 | 0.646698  | 2.469340  |
| 48 | 6 | 0 | -5.846156 | 0.059307  | 0.014180  |
| 49 | 1 | 0 | -5.631147 | -1.360408 | -1.581362 |
| 50 | 1 | 0 | -5.863730 | 1.413363  | 1.666699  |
| 51 | 7 | 0 | -3.313380 | -2.437418 | -0.977272 |
| 52 | 8 | 0 | -3.334789 | -3.543841 | -0.500818 |
| 53 | 8 | 0 | -2.865715 | -2.123789 | -2.061431 |
| 54 | 7 | 0 | -7.150457 | 0.537704  | -0.494208 |
| 55 | 8 | 0 | -7.593553 | -0.003700 | -1.484096 |
| 56 | 8 | 0 | -7.683653 | 1.442269  | 0.111440  |
| 57 | 6 | 0 | 5.444160  | -1.185973 | -0.647844 |
| 58 | 7 | 0 | 6.563042  | -0.704583 | -1.462111 |
| 59 | 8 | 0 | 7.681468  | -1.070283 | -1.157586 |



60      8      0      6.309259   0.037034   -2.392659

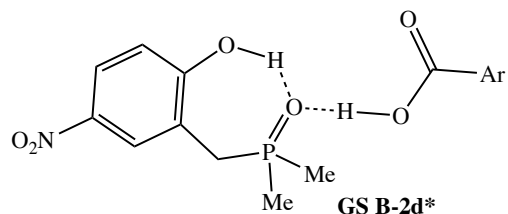

| Center | Atomic | Atomic | Coordinates (Angstroms) |   |   |
|--------|--------|--------|-------------------------|---|---|
| Number | Number | Type   | X                       | Y | Z |

|    |    |   |           |           |           |
|----|----|---|-----------|-----------|-----------|
| 1  | 6  | 0 | -4.672761 | 0.008041  | -0.817724 |
| 2  | 6  | 0 | -3.428576 | 0.257889  | -0.255240 |
| 3  | 6  | 0 | -3.239473 | 1.458668  | 0.461352  |
| 4  | 6  | 0 | -4.276857 | 2.393586  | 0.535160  |
| 5  | 6  | 0 | -5.504384 | 2.142049  | -0.042841 |
| 6  | 1  | 0 | -4.857523 | -0.902644 | -1.373455 |
| 7  | 1  | 0 | -4.091238 | 3.312681  | 1.076132  |
| 8  | 1  | 0 | -6.316612 | 2.853095  | 0.019301  |
| 9  | 6  | 0 | -2.299615 | -0.719607 | -0.474320 |
| 10 | 1  | 0 | -1.392028 | -0.213539 | -0.819923 |
| 11 | 1  | 0 | -2.580211 | -1.457170 | -1.230242 |
| 12 | 8  | 0 | -2.084395 | 1.780755  | 1.060434  |
| 13 | 1  | 0 | -1.629479 | 0.985001  | 1.402057  |
| 14 | 15 | 0 | -1.786644 | -1.592340 | 1.036826  |
| 15 | 8  | 0 | -1.151897 | -0.601437 | 2.007031  |
| 16 | 6  | 0 | 1.705365  | -0.048377 | 0.642878  |
| 17 | 8  | 0 | 0.948226  | -0.205166 | -0.286486 |
| 18 | 8  | 0 | 1.383230  | -0.043844 | 1.911587  |
| 19 | 1  | 0 | 0.404079  | -0.240850 | 2.005101  |
| 20 | 6  | 0 | 3.166112  | 0.230257  | 0.415717  |
| 21 | 6  | 0 | 3.921297  | -0.509338 | -0.490288 |

|    |   |   |           |           |           |
|----|---|---|-----------|-----------|-----------|
| 22 | 6 | 0 | 3.760663  | 1.328525  | 1.027471  |
| 23 | 6 | 0 | 5.217532  | -0.171066 | -0.822377 |
| 24 | 6 | 0 | 5.066206  | 1.688712  | 0.725529  |
| 25 | 1 | 0 | 3.186425  | 1.907818  | 1.738938  |
| 26 | 6 | 0 | 5.767638  | 0.934533  | -0.198440 |
| 27 | 1 | 0 | 5.785337  | -0.750421 | -1.536961 |
| 28 | 1 | 0 | 5.541791  | 2.541662  | 1.189802  |
| 29 | 7 | 0 | 3.377062  | -1.744510 | -1.086139 |
| 30 | 8 | 0 | 3.675702  | -1.983850 | -2.233573 |
| 31 | 8 | 0 | 2.703255  | -2.452034 | -0.365293 |
| 32 | 7 | 0 | 7.158761  | 1.312064  | -0.529119 |
| 33 | 8 | 0 | 7.748660  | 0.614480  | -1.325324 |
| 34 | 8 | 0 | 7.611508  | 2.293455  | 0.019429  |
| 35 | 6 | 0 | -5.693911 | 0.936397  | -0.702831 |
| 36 | 7 | 0 | -6.995311 | 0.638965  | -1.307833 |
| 37 | 8 | 0 | -7.862950 | 1.485201  | -1.224462 |
| 38 | 8 | 0 | -7.131628 | -0.439347 | -1.854934 |
| 39 | 6 | 0 | -3.261835 | -2.351764 | 1.744650  |
| 40 | 1 | 0 | -2.982677 | -2.922361 | 2.631769  |
| 41 | 1 | 0 | -3.740741 | -3.013199 | 1.019406  |
| 42 | 1 | 0 | -3.962446 | -1.565987 | 2.030999  |
| 43 | 6 | 0 | -0.679779 | -2.926492 | 0.542340  |
| 44 | 1 | 0 | -0.292369 | -3.418587 | 1.436508  |
| 45 | 1 | 0 | 0.155193  | -2.515634 | -0.027019 |
| 46 | 1 | 0 | -1.214842 | -3.658172 | -0.066650 |

---

### 3. TS A Structures for analogs (needed to calculate values for Table 2)

For **1a** (see section 1, above)

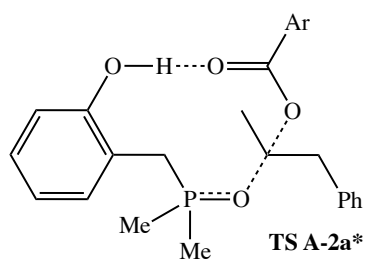

| Center<br>Number | Atomic<br>Number | Atomic<br>Type | Coordinates (Angstroms) |           |           |
|------------------|------------------|----------------|-------------------------|-----------|-----------|
|                  |                  |                | X                       | Y         | Z         |
| 1                | 1                | 0              | -0.074748               | 3.336268  | 0.540027  |
| 2                | 6                | 0              | 0.936281                | 3.390503  | 0.152986  |
| 3                | 6                | 0              | 3.525130                | 3.463123  | -0.854880 |
| 4                | 6                | 0              | 1.271189                | 4.288927  | -0.850569 |
| 5                | 6                | 0              | 1.905319                | 2.525719  | 0.652882  |
| 6                | 6                | 0              | 3.208170                | 2.545208  | 0.139382  |
| 7                | 1                | 0              | 0.507707                | 4.949171  | -1.245092 |
| 8                | 1                | 0              | 4.535797                | 3.485603  | -1.252434 |
| 9                | 6                | 0              | 4.183791                | 1.507116  | 0.623825  |
| 10               | 1                | 0              | 4.197949                | 1.449435  | 1.715264  |
| 11               | 1                | 0              | 5.194773                | 1.741209  | 0.280463  |
| 12               | 15               | 0              | 3.774648                | -0.200997 | 0.057130  |
| 13               | 1                | 0              | 3.194943                | -3.999436 | -0.206983 |
| 14               | 6                | 0              | 2.359832                | -3.642943 | -0.801225 |
| 15               | 6                | 0              | 0.238693                | -2.699377 | -2.317816 |
| 16               | 6                | 0              | 1.282544                | -3.030400 | -0.164916 |
| 17               | 6                | 0              | 2.378611                | -3.785719 | -2.184022 |
| 18               | 6                | 0              | 1.318040                | -3.309620 | -2.946956 |
| 19               | 6                | 0              | 0.217784                | -2.566723 | -0.935625 |
| 20               | 1                | 0              | 3.221879                | -4.268181 | -2.666087 |
| 21               | 1                | 0              | 1.332220                | -3.415175 | -4.025777 |
| 22               | 1                | 0              | -0.590178               | -2.320589 | -2.904597 |
| 23               | 6                | 0              | 1.313137                | -1.427994 | 1.789455  |
| 24               | 1                | 0              | -0.617634               | -2.081151 | -0.445590 |

|    |   |   |           |           |           |
|----|---|---|-----------|-----------|-----------|
| 25 | 6 | 0 | 1.569834  | -1.131248 | 3.221966  |
| 26 | 1 | 0 | 1.480853  | -0.068301 | 3.427870  |
| 27 | 1 | 0 | 2.579813  | -1.466126 | 3.463538  |
| 28 | 1 | 0 | 0.858426  | -1.690478 | 3.831674  |
| 29 | 6 | 0 | 1.280587  | -2.848704 | 1.330536  |
| 30 | 1 | 0 | 0.376377  | -3.282557 | 1.767722  |
| 31 | 1 | 0 | 2.133899  | -3.357931 | 1.784118  |
| 32 | 1 | 0 | 1.123667  | -0.629738 | 1.098308  |
| 33 | 8 | 0 | 3.308925  | -1.132658 | 1.167867  |
| 34 | 8 | 0 | 1.659870  | 1.611792  | 1.610045  |
| 35 | 6 | 0 | -2.997763 | 0.590514  | -0.125161 |
| 36 | 6 | 0 | -5.047044 | -0.795094 | 1.086942  |
| 37 | 6 | 0 | -4.265956 | 0.691963  | -0.661463 |
| 38 | 6 | 0 | -2.716319 | -0.159654 | 1.012907  |
| 39 | 6 | 0 | -3.761615 | -0.862703 | 1.602552  |
| 40 | 6 | 0 | -5.276981 | -0.015290 | -0.035170 |
| 41 | 1 | 0 | -4.465135 | 1.292832  | -1.537778 |
| 42 | 1 | 0 | -3.554167 | -1.462849 | 2.479414  |
| 43 | 1 | 0 | -5.870190 | -1.331512 | 1.538733  |
| 44 | 7 | 0 | -6.641316 | 0.062088  | -0.591736 |
| 45 | 8 | 0 | -6.799287 | 0.730237  | -1.591855 |
| 46 | 8 | 0 | -7.515115 | -0.548346 | -0.012615 |
| 47 | 7 | 0 | -1.908111 | 1.273168  | -0.846466 |
| 48 | 8 | 0 | -0.880902 | 0.645832  | -1.013740 |
| 49 | 8 | 0 | -2.124982 | 2.390466  | -1.258705 |
| 50 | 6 | 0 | -1.333424 | -0.150301 | 1.641982  |
| 51 | 8 | 0 | -0.844930 | -1.278913 | 1.889450  |
| 52 | 8 | 0 | -0.848900 | 0.973803  | 1.841203  |
| 53 | 1 | 0 | 0.693376  | 1.478883  | 1.767286  |
| 54 | 6 | 0 | 5.299879  | -0.854753 | -0.669713 |
| 55 | 1 | 0 | 5.097099  | -1.853035 | -1.061440 |
| 56 | 1 | 0 | 6.069987  | -0.922965 | 0.100579  |
| 57 | 1 | 0 | 5.649115  | -0.209845 | -1.478975 |
| 58 | 6 | 0 | 2.627327  | -0.040976 | -1.328465 |

|    |   |   |          |           |           |
|----|---|---|----------|-----------|-----------|
| 59 | 1 | 0 | 2.508559 | -1.013672 | -1.807219 |
| 60 | 1 | 0 | 3.025913 | 0.680699  | -2.044863 |
| 61 | 1 | 0 | 1.651316 | 0.318657  | -0.999677 |
| 62 | 6 | 0 | 2.566344 | 4.339060  | -1.351533 |
| 63 | 1 | 0 | 2.826909 | 5.047445  | -2.128637 |

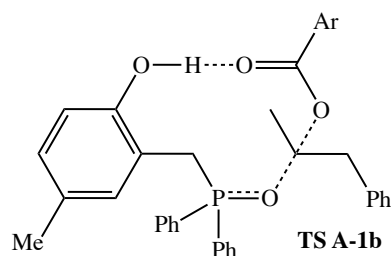


---

| Center<br>Number | Atomic<br>Number | Atomic<br>Type | Coordinates (Angstroms) |           |           |
|------------------|------------------|----------------|-------------------------|-----------|-----------|
|                  |                  |                | X                       | Y         | Z         |
| 1                | 1                | 0              | 0.496466                | 3.560873  | -0.377581 |
| 2                | 6                | 0              | -0.582465               | 3.575430  | -0.485600 |
| 3                | 6                | 0              | -3.342752               | 3.562493  | -0.717022 |
| 4                | 6                | 0              | -1.337300               | 4.624627  | 0.020335  |
| 5                | 6                | 0              | -1.218638               | 2.514477  | -1.118216 |
| 6                | 6                | 0              | -2.613338               | 2.490243  | -1.213947 |
| 7                | 6                | 0              | -2.725261               | 4.647652  | -0.098758 |
| 8                | 1                | 0              | -0.830856               | 5.443880  | 0.520912  |
| 9                | 1                | 0              | -4.427439               | 3.538765  | -0.789927 |
| 10               | 6                | 0              | -3.273399               | 1.252336  | -1.757177 |
| 11               | 1                | 0              | -2.902595               | 1.002810  | -2.755565 |
| 12               | 1                | 0              | -4.353707               | 1.397463  | -1.816502 |
| 13               | 15               | 0              | -2.937622               | -0.273939 | -0.755134 |
| 14               | 6                | 0              | -2.293117               | 0.297159  | 0.838116  |
| 15               | 6                | 0              | -1.292011               | 1.448085  | 3.164581  |
| 16               | 6                | 0              | -3.091934               | 1.156255  | 1.599155  |

|    |   |   |           |           |           |
|----|---|---|-----------|-----------|-----------|
| 17 | 6 | 0 | -1.000739 | 0.008311  | 1.262400  |
| 18 | 6 | 0 | -0.498896 | 0.585546  | 2.422292  |
| 19 | 6 | 0 | -2.593562 | 1.726762  | 2.758225  |
| 20 | 1 | 0 | -4.101371 | 1.392825  | 1.279431  |
| 21 | 1 | 0 | -0.368100 | -0.664975 | 0.704533  |
| 22 | 1 | 0 | 0.520822  | 0.369442  | 2.716502  |
| 23 | 1 | 0 | -3.214857 | 2.400444  | 3.336554  |
| 24 | 1 | 0 | -0.895567 | 1.909321  | 4.062021  |
| 25 | 6 | 0 | -4.548913 | -1.029184 | -0.380723 |
| 26 | 6 | 0 | -6.924646 | -2.396970 | 0.117840  |
| 27 | 6 | 0 | -4.745957 | -1.672793 | 0.841854  |
| 28 | 6 | 0 | -5.544909 | -1.089235 | -1.356380 |
| 29 | 6 | 0 | -6.729823 | -1.767565 | -1.106048 |
| 30 | 6 | 0 | -5.931898 | -2.351660 | 1.088937  |
| 31 | 1 | 0 | -3.971344 | -1.639948 | 1.599961  |
| 32 | 1 | 0 | -5.398122 | -0.614618 | -2.321010 |
| 33 | 1 | 0 | -7.500290 | -1.806805 | -1.867227 |
| 34 | 1 | 0 | -6.080498 | -2.845101 | 2.042427  |
| 35 | 1 | 0 | -7.850744 | -2.925353 | 0.313365  |
| 36 | 1 | 0 | -2.235023 | -3.632243 | -0.087887 |
| 37 | 6 | 0 | -1.366152 | -3.487340 | 0.544511  |
| 38 | 6 | 0 | 0.845562  | -3.045787 | 2.161606  |
| 39 | 6 | 0 | -0.144713 | -3.155216 | -0.039163 |
| 40 | 6 | 0 | -1.481576 | -3.594486 | 1.923873  |
| 41 | 6 | 0 | -0.376955 | -3.366892 | 2.736911  |
| 42 | 6 | 0 | 0.962340  | -2.947661 | 0.780372  |
| 43 | 1 | 0 | -2.438954 | -3.849963 | 2.365435  |
| 44 | 1 | 0 | -0.470018 | -3.436394 | 3.814733  |
| 45 | 1 | 0 | 1.710510  | -2.853159 | 2.784914  |
| 46 | 6 | 0 | -0.086671 | -1.511999 | -1.946001 |
| 47 | 1 | 0 | 1.911114  | -2.671895 | 0.334954  |
| 48 | 6 | 0 | -0.199002 | -1.166832 | -3.386388 |
| 49 | 1 | 0 | 0.664733  | -1.577151 | -3.912340 |
| 50 | 1 | 0 | -0.240151 | -0.088452 | -3.521318 |

|    |   |   |           |           |           |
|----|---|---|-----------|-----------|-----------|
| 51 | 1 | 0 | -1.102856 | -1.627705 | -3.788349 |
| 52 | 6 | 0 | -0.040730 | -2.946021 | -1.528159 |
| 53 | 1 | 0 | 0.904373  | -3.339901 | -1.913273 |
| 54 | 1 | 0 | -0.844969 | -3.465323 | -2.054959 |
| 55 | 1 | 0 | 0.018935  | -0.731914 | -1.221972 |
| 56 | 8 | 0 | -2.105654 | -1.300656 | -1.506290 |
| 57 | 8 | 0 | -0.572760 | 1.451751  | -1.633981 |
| 58 | 6 | 0 | 4.399684  | 0.264124  | 0.403022  |
| 59 | 6 | 0 | 6.255964  | -0.447686 | -1.505855 |
| 60 | 6 | 0 | 5.738682  | 0.428963  | 0.694400  |
| 61 | 6 | 0 | 3.946855  | -0.218137 | -0.821416 |
| 62 | 6 | 0 | 4.900492  | -0.584081 | -1.765608 |
| 63 | 6 | 0 | 6.650690  | 0.062942  | -0.280583 |
| 64 | 1 | 0 | 6.069616  | 0.819184  | 1.646799  |
| 65 | 1 | 0 | 4.558347  | -0.974342 | -2.715581 |
| 66 | 1 | 0 | 7.006096  | -0.723392 | -2.234247 |
| 67 | 7 | 0 | 8.089764  | 0.218235  | 0.006149  |
| 68 | 8 | 0 | 8.398684  | 0.645694  | 1.098688  |
| 69 | 8 | 0 | 8.869689  | -0.091878 | -0.869767 |
| 70 | 7 | 0 | 3.445468  | 0.552517  | 1.488161  |
| 71 | 8 | 0 | 2.644424  | -0.321617 | 1.751676  |
| 72 | 8 | 0 | 3.562002  | 1.603623  | 2.075243  |
| 73 | 6 | 0 | 2.471336  | -0.240175 | -1.190790 |
| 74 | 8 | 0 | 2.089919  | -1.238212 | -1.846082 |
| 75 | 8 | 0 | 1.818114  | 0.753264  | -0.826924 |
| 76 | 1 | 0 | 0.355530  | 1.344935  | -1.313659 |
| 77 | 6 | 0 | -3.532227 | 5.812101  | 0.414871  |
| 78 | 1 | 0 | -4.546207 | 5.505960  | 0.683671  |
| 79 | 1 | 0 | -3.615753 | 6.599556  | -0.341149 |
| 80 | 1 | 0 | -3.068890 | 6.254528  | 1.299880  |

---

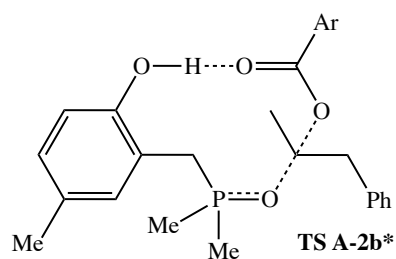

| Center<br>Number | Atomic<br>Number | Atomic<br>Type | Coordinates (Angstroms) |           |           |
|------------------|------------------|----------------|-------------------------|-----------|-----------|
|                  |                  |                | X                       | Y         | Z         |
| 1                | 1                | 0              | -0.032982               | 3.062440  | -1.006423 |
| 2                | 6                | 0              | -1.056622               | 3.090278  | -0.650744 |
| 3                | 6                | 0              | -3.656296               | 3.106338  | 0.302817  |
| 4                | 6                | 0              | -1.471173               | 4.064209  | 0.245316  |
| 5                | 6                | 0              | -1.953853               | 2.115111  | -1.073598 |
| 6                | 6                | 0              | -3.262669               | 2.108795  | -0.582172 |
| 7                | 1                | 0              | -0.754253               | 4.806354  | 0.581011  |
| 8                | 1                | 0              | -4.675742               | 3.099696  | 0.681794  |
| 9                | 6                | 0              | -4.160377               | 0.958284  | -0.949117 |
| 10               | 1                | 0              | -4.141352               | 0.762116  | -2.024136 |
| 11               | 1                | 0              | -5.192743               | 1.166960  | -0.656718 |
| 12               | 15               | 0              | -3.657987               | -0.631689 | -0.158524 |
| 13               | 1                | 0              | -2.825925               | -4.314299 | 0.612661  |
| 14               | 6                | 0              | -2.035540               | -3.824784 | 1.172394  |
| 15               | 6                | 0              | -0.031231               | -2.542579 | 2.596306  |
| 16               | 6                | 0              | -0.984701               | -3.222857 | 0.483900  |
| 17               | 6                | 0              | -2.085812               | -3.789431 | 2.561297  |
| 18               | 6                | 0              | -1.084040               | -3.143455 | 3.277323  |
| 19               | 6                | 0              | 0.021896                | -2.587829 | 1.209346  |
| 20               | 1                | 0              | -2.907750               | -4.265698 | 3.084619  |
| 21               | 1                | 0              | -1.123115               | -3.109997 | 4.360179  |
| 22               | 1                | 0              | 0.751483                | -2.032154 | 3.145546  |
| 23               | 6                | 0              | -1.066525               | -1.892269 | -1.664018 |
| 24               | 1                | 0              | 0.835821                | -2.109804 | 0.677555  |



|    |   |   |           |           |           |
|----|---|---|-----------|-----------|-----------|
| 25 | 6 | 0 | -1.300732 | -1.803691 | -3.128114 |
| 26 | 1 | 0 | -1.279230 | -0.772998 | -3.470571 |
| 27 | 1 | 0 | -2.277763 | -2.239018 | -3.343651 |
| 28 | 1 | 0 | -0.534883 | -2.384935 | -3.644063 |
| 29 | 6 | 0 | -0.951305 | -3.235752 | -1.022041 |
| 30 | 1 | 0 | -0.007464 | -3.657188 | -1.380417 |
| 31 | 1 | 0 | -1.754707 | -3.858436 | -1.422025 |
| 32 | 1 | 0 | -0.950820 | -0.999325 | -1.080559 |
| 33 | 8 | 0 | -3.094222 | -1.661942 | -1.127850 |
| 34 | 8 | 0 | -1.626772 | 1.118652  | -1.920241 |
| 35 | 6 | 0 | 3.044977  | 0.658380  | 0.047231  |
| 36 | 6 | 0 | 5.216636  | -0.719501 | -0.939902 |
| 37 | 6 | 0 | 4.289139  | 0.921895  | 0.584606  |
| 38 | 6 | 0 | 2.845719  | -0.252420 | -0.986150 |
| 39 | 6 | 0 | 3.952381  | -0.948013 | -1.461522 |
| 40 | 6 | 0 | 5.362977  | 0.215263  | 0.072493  |
| 41 | 1 | 0 | 4.423650  | 1.645129  | 1.376744  |
| 42 | 1 | 0 | 3.809678  | -1.671100 | -2.254547 |
| 43 | 1 | 0 | 6.086492  | -1.248599 | -1.304312 |
| 44 | 7 | 0 | 6.704285  | 0.465494  | 0.633964  |
| 45 | 8 | 0 | 6.789903  | 1.269104  | 1.538713  |
| 46 | 8 | 0 | 7.633290  | -0.149460 | 0.153998  |
| 47 | 7 | 0 | 1.891875  | 1.346933  | 0.655456  |
| 48 | 8 | 0 | 0.907198  | 0.673343  | 0.885699  |
| 49 | 8 | 0 | 2.019270  | 2.520909  | 0.922526  |
| 50 | 6 | 0 | 1.482508  | -0.424554 | -1.634559 |
| 51 | 8 | 0 | 1.079183  | -1.607845 | -1.739358 |
| 52 | 8 | 0 | 0.928254  | 0.626318  | -1.989302 |
| 53 | 1 | 0 | -0.649892 | 1.028664  | -2.031278 |
| 54 | 6 | 0 | -5.158797 | -1.293663 | 0.610709  |
| 55 | 1 | 0 | -4.903281 | -2.217904 | 1.131857  |
| 56 | 1 | 0 | -5.898008 | -1.511832 | -0.161980 |
| 57 | 1 | 0 | -5.575252 | -0.577409 | 1.322283  |
| 58 | 6 | 0 | -2.568814 | -0.215116 | 1.220540  |

|    |   |   |           |           |          |
|----|---|---|-----------|-----------|----------|
| 59 | 1 | 0 | -2.403684 | -1.105881 | 1.827582 |
| 60 | 1 | 0 | -3.035260 | 0.566608  | 1.824058 |
| 61 | 1 | 0 | -1.608255 | 0.164254  | 0.868804 |
| 62 | 6 | 0 | -3.229856 | 5.191193  | 1.665620 |
| 63 | 1 | 0 | -4.092806 | 4.876244  | 2.257232 |
| 64 | 1 | 0 | -3.519265 | 6.091195  | 1.113572 |
| 65 | 1 | 0 | -2.432373 | 5.472753  | 2.357365 |
| 66 | 6 | 0 | -2.778298 | 4.101150  | 0.728085 |

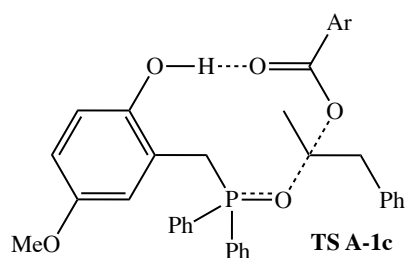

| Center<br>Number | Atomic<br>Number | Atomic<br>Type | Coordinates (Angstroms) |           |           |
|------------------|------------------|----------------|-------------------------|-----------|-----------|
|                  |                  |                | X                       | Y         | Z         |
| 1                | 1                | 0              | 1.477587                | 2.242162  | -2.220253 |
| 2                | 6                | 0              | 0.465964                | 2.454278  | -1.895864 |
| 3                | 6                | 0              | -2.116125               | 2.954845  | -1.031645 |
| 4                | 6                | 0              | 0.206284                | 3.552610  | -1.101538 |
| 5                | 6                | 0              | -0.557810               | 1.568022  | -2.243797 |
| 6                | 6                | 0              | -1.852791               | 1.817310  | -1.799881 |
| 7                | 6                | 0              | -1.092051               | 3.813886  | -0.662452 |
| 8                | 1                | 0              | 1.007531                | 4.210868  | -0.790411 |
| 9                | 1                | 0              | -3.127154               | 3.113633  | -0.676013 |
| 10               | 6                | 0              | -2.935355               | 0.797039  | -2.015049 |
| 11               | 1                | 0              | -2.784439               | 0.229937  | -2.936179 |
| 12               | 1                | 0              | -3.915401               | 1.276909  | -2.068581 |
| 13               | 15               | 0              | -3.009975               | -0.468373 | -0.679506 |

|    |   |   |           |           |           |
|----|---|---|-----------|-----------|-----------|
| 14 | 6 | 0 | -2.542839 | 0.358043  | 0.864097  |
| 15 | 6 | 0 | -1.741047 | 1.752886  | 3.136241  |
| 16 | 6 | 0 | -3.472166 | 0.679304  | 1.851721  |
| 17 | 6 | 0 | -1.203714 | 0.718899  | 1.036427  |
| 18 | 6 | 0 | -0.807032 | 1.417976  | 2.162518  |
| 19 | 6 | 0 | -3.068783 | 1.375232  | 2.985997  |
| 20 | 1 | 0 | -4.509509 | 0.384224  | 1.748961  |
| 21 | 1 | 0 | -0.455800 | 0.484304  | 0.290348  |
| 22 | 1 | 0 | 0.233838  | 1.698244  | 2.262239  |
| 23 | 1 | 0 | -3.795810 | 1.619432  | 3.752201  |
| 24 | 1 | 0 | -1.430758 | 2.302897  | 4.017647  |
| 25 | 6 | 0 | -4.751295 | -0.961107 | -0.537859 |
| 26 | 6 | 0 | -7.388411 | -1.815001 | -0.288509 |
| 27 | 6 | 0 | -5.040620 | -2.321066 | -0.446615 |
| 28 | 6 | 0 | -5.790950 | -0.029561 | -0.507958 |
| 29 | 6 | 0 | -7.105223 | -0.456556 | -0.381706 |
| 30 | 6 | 0 | -6.357618 | -2.745349 | -0.321962 |
| 31 | 1 | 0 | -4.226495 | -3.035327 | -0.486241 |
| 32 | 1 | 0 | -5.581154 | 1.033152  | -0.572351 |
| 33 | 1 | 0 | -7.908869 | 0.270078  | -0.358771 |
| 34 | 1 | 0 | -6.578504 | -3.804183 | -0.254312 |
| 35 | 1 | 0 | -8.415739 | -2.147283 | -0.192931 |
| 36 | 1 | 0 | -2.272916 | -2.973534 | 1.686370  |
| 37 | 6 | 0 | -1.347690 | -2.569159 | 2.084154  |
| 38 | 6 | 0 | 1.005318  | -1.499118 | 3.081083  |
| 39 | 6 | 0 | -0.195234 | -2.606099 | 1.303313  |
| 40 | 6 | 0 | -1.327565 | -2.004398 | 3.352527  |
| 41 | 6 | 0 | -0.148801 | -1.468457 | 3.854351  |
| 42 | 6 | 0 | 0.983555  | -2.065912 | 1.814092  |
| 43 | 1 | 0 | -2.235852 | -1.971960 | 3.943416  |
| 44 | 1 | 0 | -0.131971 | -1.020927 | 4.841731  |
| 45 | 1 | 0 | 1.927803  | -1.077033 | 3.463798  |
| 46 | 6 | 0 | -0.202056 | -2.253522 | -1.211008 |
| 47 | 1 | 0 | 1.878068  | -2.084109 | 1.203173  |

|    |   |   |           |           |           |
|----|---|---|-----------|-----------|-----------|
| 48 | 6 | 0 | -0.397720 | -2.745752 | -2.599608 |
| 49 | 1 | 0 | -0.540638 | -1.914536 | -3.285363 |
| 50 | 1 | 0 | -1.264976 | -3.406646 | -2.629424 |
| 51 | 1 | 0 | 0.488498  | -3.313110 | -2.886351 |
| 52 | 6 | 0 | -0.223945 | -3.220161 | -0.073123 |
| 53 | 1 | 0 | 0.644355  | -3.868603 | -0.221201 |
| 54 | 1 | 0 | -1.111789 | -3.843817 | -0.199584 |
| 55 | 1 | 0 | 0.012475  | -1.214397 | -1.039923 |
| 56 | 8 | 0 | -2.189096 | -1.712842 | -0.970599 |
| 57 | 8 | 0 | -0.329664 | 0.449049  | -2.973576 |
| 58 | 6 | 0 | 4.181090  | 0.280331  | -0.205968 |
| 59 | 6 | 0 | 6.209354  | -1.535878 | -0.627682 |
| 60 | 6 | 0 | 5.442756  | 0.581110  | 0.268894  |
| 61 | 6 | 0 | 3.896213  | -0.887103 | -0.908285 |
| 62 | 6 | 0 | 4.931976  | -1.796889 | -1.098565 |
| 63 | 6 | 0 | 6.443406  | -0.347512 | 0.045756  |
| 64 | 1 | 0 | 5.643699  | 1.501154  | 0.799674  |
| 65 | 1 | 0 | 4.723044  | -2.717054 | -1.629437 |
| 66 | 1 | 0 | 7.023070  | -2.232759 | -0.774733 |
| 67 | 7 | 0 | 7.798455  | -0.060542 | 0.552883  |
| 68 | 8 | 0 | 7.958616  | 0.975248  | 1.163891  |
| 69 | 8 | 0 | 8.663999  | -0.879931 | 0.326261  |
| 70 | 7 | 0 | 3.103420  | 1.231162  | 0.120678  |
| 71 | 8 | 0 | 2.043891  | 0.759075  | 0.480056  |
| 72 | 8 | 0 | 3.360296  | 2.413400  | 0.056086  |
| 73 | 6 | 0 | 2.532904  | -1.140300 | -1.532473 |
| 74 | 8 | 0 | 2.000906  | -2.237040 | -1.242586 |
| 75 | 8 | 0 | 2.113439  | -0.238174 | -2.271715 |
| 76 | 1 | 0 | 0.607835  | 0.172076  | -2.856960 |
| 77 | 6 | 0 | -2.483403 | 5.042294  | 0.805339  |
| 78 | 1 | 0 | -3.306318 | 5.238284  | 0.106207  |
| 79 | 1 | 0 | -2.374380 | 5.899717  | 1.467971  |
| 80 | 1 | 0 | -2.717022 | 4.149572  | 1.399800  |
| 81 | 8 | 0 | -1.252045 | 4.903576  | 0.137604  |

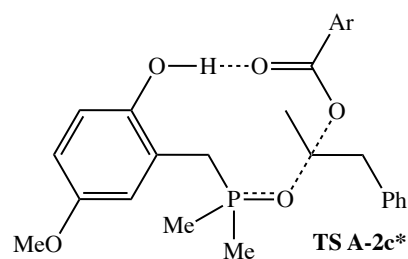

| Center<br>Number | Atomic<br>Number | Atomic<br>Type | Coordinates (Angstroms) |           |           |
|------------------|------------------|----------------|-------------------------|-----------|-----------|
|                  |                  |                | X                       | Y         | Z         |
| 1                | 1                | 0              | -0.140535               | 2.781651  | -1.350636 |
| 2                | 6                | 0              | -1.162530               | 2.770291  | -0.989916 |
| 3                | 6                | 0              | -3.757354               | 2.698234  | -0.023936 |
| 4                | 6                | 0              | -1.621262               | 3.793333  | -0.164427 |
| 5                | 6                | 0              | -1.993553               | 1.715177  | -1.331958 |
| 6                | 6                | 0              | -3.300940               | 1.668738  | -0.830947 |
| 7                | 6                | 0              | -2.927027               | 3.767911  | 0.312819  |
| 8                | 1                | 0              | -0.939660               | 4.590435  | 0.099842  |
| 9                | 1                | 0              | -4.766308               | 2.686586  | 0.374828  |
| 10               | 6                | 0              | -4.128988               | 0.442110  | -1.101540 |
| 11               | 1                | 0              | -4.086003               | 0.155883  | -2.155176 |
| 12               | 1                | 0              | -5.174054               | 0.615204  | -0.832925 |
| 13               | 15               | 0              | -3.540275               | -1.038928 | -0.171065 |
| 14               | 1                | 0              | -2.483270               | -4.568671 | 0.934197  |
| 15               | 6                | 0              | -1.730108               | -3.982564 | 1.450757  |
| 16               | 6                | 0              | 0.177366                | -2.455503 | 2.761609  |
| 17               | 6                | 0              | -0.712105               | -3.379980 | 0.715069  |
| 18               | 6                | 0              | -1.795647               | -3.826413 | 2.830665  |
| 19               | 6                | 0              | -0.842653               | -3.057673 | 3.489704  |
| 20               | 6                | 0              | 0.246297                | -2.621116 | 1.384564  |
| 21               | 1                | 0              | -2.591557               | -4.304284 | 3.391397  |
| 22               | 1                | 0              | -0.894121               | -2.930003 | 4.564998  |
| 23               | 1                | 0              | 0.921865                | -1.850358 | 3.265967  |
| 24               | 6                | 0              | -0.856112               | -2.257652 | -1.547025 |

|    |   |   |           |           |           |
|----|---|---|-----------|-----------|-----------|
| 25 | 1 | 0 | 1.034408  | -2.143254 | 0.815172  |
| 26 | 6 | 0 | -1.081422 | -2.320786 | -3.013814 |
| 27 | 1 | 0 | -1.132273 | -1.327169 | -3.449856 |
| 28 | 1 | 0 | -2.021858 | -2.844763 | -3.191661 |
| 29 | 1 | 0 | -0.270059 | -2.889168 | -3.471221 |
| 30 | 6 | 0 | -0.662975 | -3.526596 | -0.783308 |
| 31 | 1 | 0 | 0.308922  | -3.918340 | -1.097667 |
| 32 | 1 | 0 | -1.421648 | -4.232811 | -1.128004 |
| 33 | 1 | 0 | -0.804885 | -1.308086 | -1.049719 |
| 34 | 8 | 0 | -2.901510 | -2.111366 | -1.042887 |
| 35 | 8 | 0 | -1.608966 | 0.676727  | -2.107110 |
| 36 | 6 | 0 | 3.056497  | 0.693564  | -0.032574 |
| 37 | 6 | 0 | 5.323757  | -0.636534 | -0.857706 |
| 38 | 6 | 0 | 4.272782  | 1.079646  | 0.494470  |
| 39 | 6 | 0 | 2.930568  | -0.319126 | -0.979152 |
| 40 | 6 | 0 | 4.085106  | -0.987652 | -1.372595 |
| 41 | 6 | 0 | 5.395769  | 0.394582  | 0.065107  |
| 42 | 1 | 0 | 4.350021  | 1.879289  | 1.217809  |
| 43 | 1 | 0 | 3.999738  | -1.788085 | -2.096557 |
| 44 | 1 | 0 | 6.229905  | -1.143711 | -1.159474 |
| 45 | 7 | 0 | 6.709033  | 0.775798  | 0.619094  |
| 46 | 8 | 0 | 6.730005  | 1.663561  | 1.445690  |
| 47 | 8 | 0 | 7.681496  | 0.175887  | 0.211761  |
| 48 | 7 | 0 | 1.854393  | 1.364893  | 0.494943  |
| 49 | 8 | 0 | 0.910511  | 0.657145  | 0.783939  |
| 50 | 8 | 0 | 1.905779  | 2.565518  | 0.645252  |
| 51 | 6 | 0 | 1.592748  | -0.633506 | -1.627481 |
| 52 | 8 | 0 | 1.267584  | -1.845348 | -1.635266 |
| 53 | 8 | 0 | 0.978717  | 0.344796  | -2.077365 |
| 54 | 1 | 0 | -0.627794 | 0.630562  | -2.194386 |
| 55 | 6 | 0 | -5.007777 | -1.722991 | 0.641252  |
| 56 | 1 | 0 | -4.703014 | -2.580799 | 1.243267  |
| 57 | 1 | 0 | -5.721948 | -2.052995 | -0.115125 |
| 58 | 1 | 0 | -5.476415 | -0.974737 | 1.284088  |

|    |   |   |           |           |          |
|----|---|---|-----------|-----------|----------|
| 59 | 6 | 0 | -2.496260 | -0.435382 | 1.173085 |
| 60 | 1 | 0 | -2.276799 | -1.258729 | 1.853545 |
| 61 | 1 | 0 | -3.021231 | 0.359757  | 1.706991 |
| 62 | 1 | 0 | -1.560703 | -0.021149 | 0.794090 |
| 63 | 6 | 0 | -2.671504 | 5.804910  | 1.497504 |
| 64 | 1 | 0 | -1.795438 | 5.475574  | 2.068947 |
| 65 | 1 | 0 | -3.292950 | 6.438271  | 2.128570 |
| 66 | 1 | 0 | -2.336698 | 6.382090  | 0.627294 |
| 67 | 8 | 0 | -3.481309 | 4.716926  | 1.116957 |

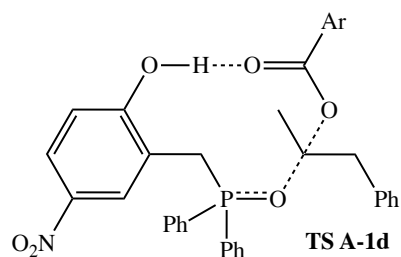

| Center Number | Atomic Number | Atomic Type | Coordinates (Angstroms) |          |           |
|---------------|---------------|-------------|-------------------------|----------|-----------|
|               |               |             | X                       | Y        | Z         |
| 1             | 1             | 0           | 1.427263                | 2.205597 | -2.055101 |
| 2             | 6             | 0           | 0.400002                | 2.406482 | -1.778705 |
| 3             | 6             | 0           | -2.244646               | 2.853877 | -1.046418 |
| 4             | 6             | 0           | 0.080219                | 3.523909 | -1.032804 |
| 5             | 6             | 0           | -0.594574               | 1.493404 | -2.143315 |
| 6             | 6             | 0           | -1.928891               | 1.712978 | -1.764542 |
| 7             | 6             | 0           | -1.245338               | 3.742492 | -0.685041 |
| 8             | 1             | 0           | 0.844837                | 4.217187 | -0.711414 |
| 9             | 1             | 0           | -3.257570               | 3.042344 | -0.713880 |
| 10            | 6             | 0           | -2.959912               | 0.645418 | -1.997267 |
| 11            | 1             | 0           | -2.776961               | 0.093971 | -2.921864 |
| 12            | 1             | 0           | -3.957546               | 1.085122 | -2.055954 |

|    |    |   |           |           |           |
|----|----|---|-----------|-----------|-----------|
| 13 | 15 | 0 | -2.993834 | -0.634503 | -0.665782 |
| 14 | 6  | 0 | -2.512112 | 0.207351  | 0.862000  |
| 15 | 6  | 0 | -1.697806 | 1.687167  | 3.074753  |
| 16 | 6  | 0 | -3.439301 | 0.582149  | 1.832680  |
| 17 | 6  | 0 | -1.168218 | 0.554751  | 1.025050  |
| 18 | 6  | 0 | -0.764849 | 1.296498  | 2.120883  |
| 19 | 6  | 0 | -3.028908 | 1.319549  | 2.937228  |
| 20 | 1  | 0 | -4.481079 | 0.301057  | 1.738012  |
| 21 | 1  | 0 | -0.419457 | 0.268571  | 0.298504  |
| 22 | 1  | 0 | 0.279579  | 1.565683  | 2.213837  |
| 23 | 1  | 0 | -3.755467 | 1.612828  | 3.685826  |
| 24 | 1  | 0 | -1.384662 | 2.277205  | 3.928375  |
| 25 | 6  | 0 | -4.724987 | -1.150749 | -0.505437 |
| 26 | 6  | 0 | -7.343776 | -2.046469 | -0.221059 |
| 27 | 6  | 0 | -4.990637 | -2.515320 | -0.408146 |
| 28 | 6  | 0 | -5.778819 | -0.235400 | -0.464080 |
| 29 | 6  | 0 | -7.084082 | -0.683832 | -0.320251 |
| 30 | 6  | 0 | -6.298800 | -2.960383 | -0.266012 |
| 31 | 1  | 0 | -4.166290 | -3.217105 | -0.456854 |
| 32 | 1  | 0 | -5.588823 | 0.830834  | -0.531453 |
| 33 | 1  | 0 | -7.898579 | 0.030052  | -0.287430 |
| 34 | 1  | 0 | -6.501718 | -4.022430 | -0.193451 |
| 35 | 1  | 0 | -8.364245 | -2.394964 | -0.111346 |
| 36 | 1  | 0 | -2.209016 | -3.163086 | 1.645266  |
| 37 | 6  | 0 | -1.295095 | -2.735978 | 2.045284  |
| 38 | 6  | 0 | 1.028499  | -1.608638 | 3.049074  |
| 39 | 6  | 0 | -0.138886 | -2.747688 | 1.269548  |
| 40 | 6  | 0 | -1.293683 | -2.165764 | 3.311449  |
| 41 | 6  | 0 | -0.130059 | -1.600576 | 3.816323  |
| 42 | 6  | 0 | 1.025292  | -2.179806 | 1.783863  |
| 43 | 1  | 0 | -2.205004 | -2.151957 | 3.898230  |
| 44 | 1  | 0 | -0.128442 | -1.148001 | 4.801374  |
| 45 | 1  | 0 | 1.939105  | -1.163948 | 3.434332  |
| 46 | 6  | 0 | -0.154565 | -2.379066 | -1.238116 |



|    |   |   |           |           |           |
|----|---|---|-----------|-----------|-----------|
| 47 | 1 | 0 | 1.923991  | -2.178524 | 1.178520  |
| 48 | 6 | 0 | -0.342435 | -2.860538 | -2.630544 |
| 49 | 1 | 0 | 0.512830  | -3.483375 | -2.895944 |
| 50 | 1 | 0 | -0.421672 | -2.027718 | -3.324528 |
| 51 | 1 | 0 | -1.247422 | -3.467708 | -2.677416 |
| 52 | 6 | 0 | -0.149390 | -3.355324 | -0.109986 |
| 53 | 1 | 0 | 0.738427  | -3.976065 | -0.263314 |
| 54 | 1 | 0 | -1.017261 | -4.005603 | -0.242760 |
| 55 | 1 | 0 | 0.033228  | -1.338392 | -1.053238 |
| 56 | 8 | 0 | -2.155883 | -1.860393 | -0.984067 |
| 57 | 8 | 0 | -0.323326 | 0.368956  | -2.815240 |
| 58 | 6 | 0 | 4.213949  | 0.231119  | -0.218008 |
| 59 | 6 | 0 | 6.234850  | -1.594025 | -0.632169 |
| 60 | 6 | 0 | 5.475482  | 0.529496  | 0.257205  |
| 61 | 6 | 0 | 3.926022  | -0.936821 | -0.918218 |
| 62 | 6 | 0 | 4.956927  | -1.851654 | -1.104992 |
| 63 | 6 | 0 | 6.472176  | -0.404860 | 0.037722  |
| 64 | 1 | 0 | 5.680739  | 1.449694  | 0.786409  |
| 65 | 1 | 0 | 4.744396  | -2.771669 | -1.634600 |
| 66 | 1 | 0 | 7.046301  | -2.294203 | -0.775965 |
| 67 | 7 | 0 | 7.828729  | -0.121525 | 0.545613  |
| 68 | 8 | 0 | 7.991381  | 0.915889  | 1.152511  |
| 69 | 8 | 0 | 8.690234  | -0.945668 | 0.322702  |
| 70 | 7 | 0 | 3.136346  | 1.183201  | 0.102636  |
| 71 | 8 | 0 | 2.093824  | 0.713812  | 0.513141  |
| 72 | 8 | 0 | 3.374114  | 2.364213  | -0.022481 |
| 73 | 6 | 0 | 2.561129  | -1.181383 | -1.538948 |
| 74 | 8 | 0 | 2.047303  | -2.297618 | -1.304168 |
| 75 | 8 | 0 | 2.116814  | -0.243885 | -2.224123 |
| 76 | 1 | 0 | 0.637789  | 0.131931  | -2.727349 |
| 77 | 7 | 0 | -1.597469 | 4.908319  | 0.126756  |
| 78 | 8 | 0 | -0.697973 | 5.644511  | 0.481904  |
| 79 | 8 | 0 | -2.771696 | 5.073444  | 0.403928  |

---

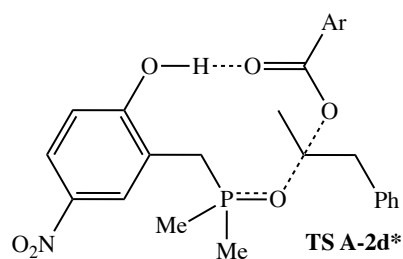

| Center<br>Number | Atomic<br>Number | Atomic<br>Type | Coordinates (Angstroms) |           |           |
|------------------|------------------|----------------|-------------------------|-----------|-----------|
|                  |                  |                | X                       | Y         | Z         |
| 1                | 1                | 0              | -0.146170               | 2.611171  | -1.473189 |
| 2                | 6                | 0              | -1.167804               | 2.555656  | -1.117965 |
| 3                | 6                | 0              | -3.784847               | 2.340076  | -0.181838 |
| 4                | 6                | 0              | -1.704230               | 3.572345  | -0.350047 |
| 5                | 6                | 0              | -1.935821               | 1.429622  | -1.418014 |
| 6                | 6                | 0              | -3.251819               | 1.311093  | -0.936309 |
| 7                | 6                | 0              | -3.011099               | 3.458469  | 0.100493  |
| 8                | 1                | 0              | -1.121654               | 4.445687  | -0.092360 |
| 9                | 1                | 0              | -4.793769               | 2.287809  | 0.207800  |
| 10               | 6                | 0              | -3.999055               | 0.029250  | -1.182259 |
| 11               | 1                | 0              | -3.926260               | -0.279856 | -2.227850 |
| 12               | 1                | 0              | -5.056079               | 0.152493  | -0.934528 |
| 13               | 15               | 0              | -3.349364               | -1.398685 | -0.206287 |
| 14               | 1                | 0              | -2.038794               | -4.828606 | 0.996481  |
| 15               | 6                | 0              | -1.344770               | -4.169361 | 1.507723  |
| 16               | 6                | 0              | 0.412510                | -2.460812 | 2.805420  |
| 17               | 6                | 0              | -0.365211               | -3.506329 | 0.771968  |
| 18               | 6                | 0              | -1.446318               | -3.983077 | 2.881762  |
| 19               | 6                | 0              | -0.568991               | -3.123619 | 3.533852  |
| 20               | 6                | 0              | 0.518333                | -2.656119 | 1.434552  |
| 21               | 1                | 0              | -2.210513               | -4.508956 | 3.443455  |
| 22               | 1                | 0              | -0.648641               | -2.973042 | 4.604363  |
| 23               | 1                | 0              | 1.098232                | -1.786353 | 3.305068  |
| 24               | 6                | 0              | -0.555144               | -2.458589 | -1.520502 |

|    |   |   |           |           |           |
|----|---|---|-----------|-----------|-----------|
| 25 | 1 | 0 | 1.276653  | -2.132342 | 0.864820  |
| 26 | 6 | 0 | -0.753714 | -2.576361 | -2.987083 |
| 27 | 1 | 0 | -0.842437 | -1.601723 | -3.458281 |
| 28 | 1 | 0 | -1.665730 | -3.149673 | -3.160991 |
| 29 | 1 | 0 | 0.089540  | -3.120907 | -3.414864 |
| 30 | 6 | 0 | -0.277575 | -3.687437 | -0.720821 |
| 31 | 1 | 0 | 0.728391  | -4.007040 | -1.009695 |
| 32 | 1 | 0 | -0.969405 | -4.461756 | -1.060332 |
| 33 | 1 | 0 | -0.577678 | -1.498537 | -1.042589 |
| 34 | 8 | 0 | -2.614963 | -2.434420 | -1.044296 |
| 35 | 8 | 0 | -1.477326 | 0.402646  | -2.135409 |
| 36 | 6 | 0 | 3.070135  | 0.830364  | -0.031038 |
| 37 | 6 | 0 | 5.464134  | -0.296020 | -0.796668 |
| 38 | 6 | 0 | 4.235152  | 1.329416  | 0.517000  |
| 39 | 6 | 0 | 3.055956  | -0.197551 | -0.969570 |
| 40 | 6 | 0 | 4.273593  | -0.762458 | -1.333359 |
| 41 | 6 | 0 | 5.423518  | 0.744737  | 0.117084  |
| 42 | 1 | 0 | 4.224699  | 2.138931  | 1.233562  |
| 43 | 1 | 0 | 4.277596  | -1.572798 | -2.051276 |
| 44 | 1 | 0 | 6.418647  | -0.721425 | -1.074928 |
| 45 | 7 | 0 | 6.685995  | 1.247099  | 0.694111  |
| 46 | 8 | 0 | 6.608673  | 2.138623  | 1.512601  |
| 47 | 8 | 0 | 7.715942  | 0.733867  | 0.311135  |
| 48 | 7 | 0 | 1.800985  | 1.397116  | 0.458726  |
| 49 | 8 | 0 | 0.904512  | 0.613076  | 0.704817  |
| 50 | 8 | 0 | 1.747586  | 2.595728  | 0.617796  |
| 51 | 6 | 0 | 1.765284  | -0.640923 | -1.634695 |
| 52 | 8 | 0 | 1.533895  | -1.871499 | -1.604027 |
| 53 | 8 | 0 | 1.086102  | 0.271331  | -2.136473 |
| 54 | 1 | 0 | -0.486962 | 0.417431  | -2.239156 |
| 55 | 6 | 0 | -4.797439 | -2.160688 | 0.566822  |
| 56 | 1 | 0 | -4.459732 | -2.991062 | 1.189359  |
| 57 | 1 | 0 | -5.464408 | -2.543869 | -0.207324 |
| 58 | 1 | 0 | -5.332600 | -1.436640 | 1.184836  |

|    |   |   |           |           |          |
|----|---|---|-----------|-----------|----------|
| 59 | 6 | 0 | -2.389036 | -0.705277 | 1.156484 |
| 60 | 1 | 0 | -2.129254 | -1.503740 | 1.852542 |
| 61 | 1 | 0 | -2.984195 | 0.052816  | 1.670578 |
| 62 | 1 | 0 | -1.472858 | -0.231826 | 0.799590 |
| 63 | 7 | 0 | -3.590242 | 4.530748  | 0.912677 |
| 64 | 8 | 0 | -2.903730 | 5.508092  | 1.135077 |
| 65 | 8 | 0 | -4.727915 | 4.380172  | 1.320359 |

#### 4. TS B Structures for analogs (needed to calculate values for Table 2)

For **1a** (see section 1, above)

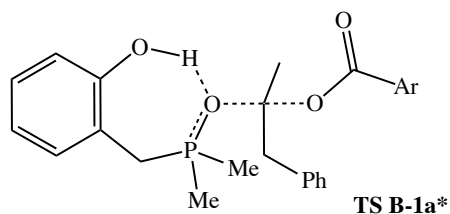

| Center<br>Number | Atomic<br>Number | Atomic<br>Type | Coordinates (Angstroms) |           |           |
|------------------|------------------|----------------|-------------------------|-----------|-----------|
|                  |                  |                | X                       | Y         | Z         |
| 1                | 15               | 0              | -1.985557               | -1.690194 | 1.101384  |
| 2                | 8                | 0              | -2.236112               | -0.179481 | 0.969738  |
| 3                | 6                | 0              | -3.612903               | -2.488315 | 1.260402  |
| 4                | 6                | 0              | -4.495241               | -2.245356 | 0.059578  |
| 5                | 6                | 0              | -4.745062               | -3.269695 | -0.852183 |
| 6                | 6                | 0              | -5.604630               | -3.087553 | -1.925530 |
| 7                | 6                | 0              | -6.235491               | -1.859987 | -2.090578 |
| 8                | 6                | 0              | -5.987604               | -0.822886 | -1.204977 |
| 9                | 6                | 0              | -5.109123               | -0.997689 | -0.138952 |
| 10               | 8                | 0              | -4.908541               | 0.044937  | 0.705727  |
| 11               | 1                | 0              | -3.958605               | 0.087806  | 0.929501  |

|    |   |   |           |           |           |
|----|---|---|-----------|-----------|-----------|
| 12 | 1 | 0 | -6.456629 | 0.146281  | -1.324121 |
| 13 | 1 | 0 | -6.917307 | -1.705177 | -2.918943 |
| 14 | 1 | 0 | -5.789286 | -3.899381 | -2.618398 |
| 15 | 1 | 0 | -4.269788 | -4.234492 | -0.702433 |
| 16 | 1 | 0 | -4.069028 | -2.076168 | 2.167076  |
| 17 | 1 | 0 | -3.461535 | -3.559117 | 1.419860  |
| 18 | 6 | 0 | -0.613573 | 1.146352  | 0.728256  |
| 19 | 6 | 0 | -0.520159 | 1.054459  | -0.745704 |
| 20 | 1 | 0 | -1.523894 | 1.083655  | -1.174629 |
| 21 | 1 | 0 | 0.019008  | 0.164624  | -1.063285 |
| 22 | 1 | 0 | 0.010113  | 1.940013  | -1.103161 |
| 23 | 1 | 0 | -0.115233 | 0.427519  | 1.353075  |
| 24 | 6 | 0 | -1.199407 | 2.339357  | 1.402534  |
| 25 | 6 | 0 | -1.865550 | 3.339718  | 0.493251  |
| 26 | 1 | 0 | -1.881909 | 1.974660  | 2.173445  |
| 27 | 1 | 0 | -0.352291 | 2.792495  | 1.926561  |
| 28 | 6 | 0 | -1.138918 | 4.416599  | -0.010987 |
| 29 | 6 | 0 | -1.729974 | 5.323123  | -0.882152 |
| 30 | 6 | 0 | -3.057352 | 5.160897  | -1.259389 |
| 31 | 6 | 0 | -3.788286 | 4.088556  | -0.762143 |
| 32 | 6 | 0 | -3.196191 | 3.182509  | 0.108739  |
| 33 | 1 | 0 | -0.099496 | 4.538208  | 0.277781  |
| 34 | 1 | 0 | -1.153205 | 6.157262  | -1.265395 |
| 35 | 1 | 0 | -3.520861 | 5.868275  | -1.937583 |
| 36 | 1 | 0 | -4.824590 | 3.955108  | -1.051272 |
| 37 | 1 | 0 | -3.776082 | 2.345295  | 0.481715  |
| 38 | 8 | 0 | 1.633106  | 1.633961  | 0.849281  |
| 39 | 6 | 0 | 2.134915  | 0.492013  | 0.977407  |
| 40 | 8 | 0 | 1.633119  | -0.517533 | 1.500953  |
| 41 | 6 | 0 | 3.543731  | 0.316875  | 0.424328  |
| 42 | 6 | 0 | 3.938921  | -0.852087 | -0.218885 |
| 43 | 6 | 0 | 5.239710  | -1.090613 | -0.614187 |
| 44 | 6 | 0 | 6.167642  | -0.091976 | -0.372992 |
| 45 | 6 | 0 | 5.824545  | 1.101853  | 0.240871  |

|    |   |   |           |           |           |
|----|---|---|-----------|-----------|-----------|
| 46 | 6 | 0 | 4.509110  | 1.296015  | 0.634356  |
| 47 | 7 | 0 | 2.940872  | -1.879658 | -0.563030 |
| 48 | 8 | 0 | 3.188482  | -3.025747 | -0.268090 |
| 49 | 8 | 0 | 1.955806  | -1.506881 | -1.171907 |
| 50 | 1 | 0 | 5.529194  | -2.012075 | -1.099936 |
| 51 | 7 | 0 | 7.564335  | -0.312107 | -0.792279 |
| 52 | 8 | 0 | 7.823294  | -1.360091 | -1.346649 |
| 53 | 8 | 0 | 8.364114  | 0.569058  | -0.555699 |
| 54 | 1 | 0 | 6.585119  | 1.853062  | 0.404019  |
| 55 | 1 | 0 | 4.206865  | 2.216368  | 1.117786  |
| 56 | 6 | 0 | -1.160485 | -2.410604 | -0.325149 |
| 57 | 1 | 0 | -0.125506 | -2.064296 | -0.380052 |
| 58 | 1 | 0 | -1.697276 | -2.127521 | -1.231855 |
| 59 | 1 | 0 | -1.158734 | -3.499472 | -0.234502 |
| 60 | 6 | 0 | -0.997993 | -2.105691 | 2.548121  |
| 61 | 1 | 0 | -0.007004 | -1.652543 | 2.434370  |
| 62 | 1 | 0 | -0.890395 | -3.189479 | 2.631426  |
| 63 | 1 | 0 | -1.484655 | -1.716688 | 3.444293  |

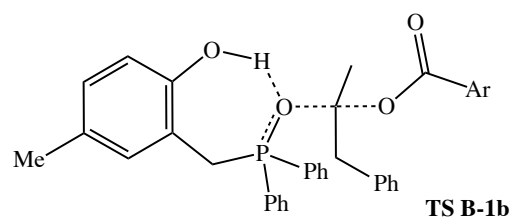

| Center<br>Number | Atomic<br>Number | Atomic<br>Type | Coordinates (Angstroms) |           |           |
|------------------|------------------|----------------|-------------------------|-----------|-----------|
|                  |                  |                | X                       | Y         | Z         |
| 1                | 15               | 0              | 1.899097                | -0.422257 | 0.768217  |
| 2                | 8                | 0              | 1.754586                | 0.967366  | 0.126643  |
| 3                | 6                | 0              | 1.286455                | -1.703038 | -0.380511 |
| 4                | 6                | 0              | 2.241667                | -2.009082 | -1.509840 |

|    |   |   |           |           |           |
|----|---|---|-----------|-----------|-----------|
| 5  | 6 | 0 | 2.817555  | -3.277687 | -1.587352 |
| 6  | 6 | 0 | 3.663796  | -3.656387 | -2.621314 |
| 7  | 6 | 0 | 3.928855  | -2.715544 | -3.615988 |
| 8  | 6 | 0 | 3.388263  | -1.443492 | -3.555873 |
| 9  | 6 | 0 | 2.556878  | -1.073433 | -2.502388 |
| 10 | 8 | 0 | 2.066172  | 0.195010  | -2.512793 |
| 11 | 1 | 0 | 1.933817  | 0.519854  | -1.606043 |
| 12 | 1 | 0 | 3.601795  | -0.704894 | -4.319191 |
| 13 | 1 | 0 | 4.576125  | -2.979519 | -4.446408 |
| 14 | 1 | 0 | 2.577716  | -4.001305 | -0.812830 |
| 15 | 1 | 0 | 0.309801  | -1.349678 | -0.738320 |
| 16 | 1 | 0 | 1.097588  | -2.607513 | 0.201958  |
| 17 | 6 | 0 | 3.653552  | -0.730300 | 1.042841  |
| 18 | 6 | 0 | 4.572029  | 0.249364  | 0.675563  |
| 19 | 6 | 0 | 5.931861  | 0.004038  | 0.825067  |
| 20 | 6 | 0 | 6.367934  | -1.212847 | 1.331767  |
| 21 | 6 | 0 | 5.448532  | -2.191988 | 1.696971  |
| 22 | 6 | 0 | 4.090937  | -1.953064 | 1.553617  |
| 23 | 1 | 0 | 4.214075  | 1.193186  | 0.278847  |
| 24 | 1 | 0 | 6.650032  | 0.764372  | 0.541767  |
| 25 | 1 | 0 | 7.429359  | -1.402731 | 1.443180  |
| 26 | 1 | 0 | 5.791735  | -3.141019 | 2.091411  |
| 27 | 1 | 0 | 3.374255  | -2.715102 | 1.842418  |
| 28 | 6 | 0 | 1.037136  | -0.636089 | 2.335156  |
| 29 | 6 | 0 | 1.714592  | -0.417020 | 3.537489  |
| 30 | 6 | 0 | 1.042423  | -0.559862 | 4.742382  |
| 31 | 6 | 0 | -0.300210 | -0.921497 | 4.749425  |
| 32 | 6 | 0 | -0.979117 | -1.131102 | 3.555373  |
| 33 | 6 | 0 | -0.316740 | -0.985297 | 2.343234  |
| 34 | 1 | 0 | 2.763568  | -0.142697 | 3.531997  |
| 35 | 1 | 0 | 1.567321  | -0.390540 | 5.675265  |
| 36 | 1 | 0 | -0.823229 | -1.035295 | 5.692184  |
| 37 | 1 | 0 | -2.031593 | -1.384307 | 3.554686  |
| 38 | 1 | 0 | -0.869367 | -1.110291 | 1.415334  |

|    |   |   |           |           |           |
|----|---|---|-----------|-----------|-----------|
| 39 | 6 | 0 | -0.076882 | 1.832710  | -0.283098 |
| 40 | 6 | 0 | -0.376312 | 2.367211  | 1.067698  |
| 41 | 1 | 0 | 0.518612  | 2.828775  | 1.488385  |
| 42 | 1 | 0 | -0.756407 | 1.592470  | 1.730046  |
| 43 | 1 | 0 | -1.141487 | 3.138937  | 0.959255  |
| 44 | 1 | 0 | -0.366995 | 0.829398  | -0.529606 |
| 45 | 6 | 0 | 0.357111  | 2.744416  | -1.389074 |
| 46 | 6 | 0 | 1.444586  | 3.731288  | -1.032258 |
| 47 | 1 | 0 | 0.634062  | 2.152617  | -2.261617 |
| 48 | 1 | 0 | -0.563191 | 3.275069  | -1.653353 |
| 49 | 6 | 0 | 1.148910  | 4.921666  | -0.371476 |
| 50 | 6 | 0 | 2.157964  | 5.814361  | -0.030107 |
| 51 | 6 | 0 | 3.477618  | 5.531118  | -0.357424 |
| 52 | 6 | 0 | 3.779860  | 4.354602  | -1.033480 |
| 53 | 6 | 0 | 2.770448  | 3.461712  | -1.367924 |
| 54 | 1 | 0 | 0.118324  | 5.156026  | -0.124842 |
| 55 | 1 | 0 | 1.910404  | 6.736014  | 0.484340  |
| 56 | 1 | 0 | 4.265461  | 6.228649  | -0.096690 |
| 57 | 1 | 0 | 4.805650  | 4.133448  | -1.307450 |
| 58 | 1 | 0 | 3.009239  | 2.546904  | -1.899293 |
| 59 | 8 | 0 | -2.292865 | 1.745343  | -0.875254 |
| 60 | 6 | 0 | -2.643625 | 0.567686  | -0.639399 |
| 61 | 8 | 0 | -1.930820 | -0.426891 | -0.413346 |
| 62 | 6 | 0 | -4.143443 | 0.299487  | -0.681232 |
| 63 | 6 | 0 | -4.804552 | -0.384168 | 0.333951  |
| 64 | 6 | 0 | -6.129544 | -0.763495 | 0.250724  |
| 65 | 6 | 0 | -6.817214 | -0.410771 | -0.896948 |
| 66 | 6 | 0 | -6.216072 | 0.293402  | -1.928727 |
| 67 | 6 | 0 | -4.880352 | 0.644896  | -1.810229 |
| 68 | 7 | 0 | -4.100445 | -0.673470 | 1.592318  |
| 69 | 8 | 0 | -3.413803 | 0.213350  | 2.054335  |
| 70 | 8 | 0 | -4.282330 | -1.758634 | 2.106150  |
| 71 | 1 | 0 | -6.616365 | -1.306986 | 1.048277  |
| 72 | 7 | 0 | -8.236255 | -0.792153 | -1.014279 |



|    |   |   |           |           |           |
|----|---|---|-----------|-----------|-----------|
| 73 | 8 | 0 | -8.735268 | -1.385947 | -0.080844 |
| 74 | 8 | 0 | -8.814197 | -0.488156 | -2.037127 |
| 75 | 1 | 0 | -6.796157 | 0.551465  | -2.804144 |
| 76 | 1 | 0 | -4.385611 | 1.192484  | -2.602423 |
| 77 | 6 | 0 | 4.287686  | -5.026980 | -2.659838 |
| 78 | 1 | 0 | 4.292822  | -5.431510 | -3.674861 |
| 79 | 1 | 0 | 3.746257  | -5.728529 | -2.021587 |
| 80 | 1 | 0 | 5.325524  | -4.994958 | -2.313020 |

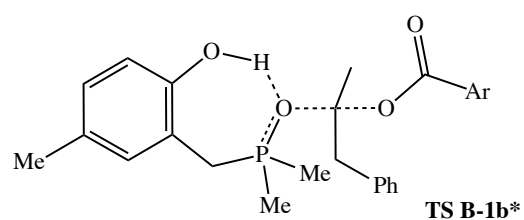

| Center<br>Number | Atomic<br>Number | Atomic<br>Type | Coordinates (Angstroms) |           |           |
|------------------|------------------|----------------|-------------------------|-----------|-----------|
|                  |                  |                | X                       | Y         | Z         |
| 1                | 15               | 0              | -1.881122               | -1.314958 | 1.416543  |
| 2                | 8                | 0              | -2.056420               | 0.187614  | 1.144768  |
| 3                | 6                | 0              | -3.543566               | -2.013976 | 1.654484  |
| 4                | 6                | 0              | -4.417564               | -1.835095 | 0.436574  |
| 5                | 6                | 0              | -4.713368               | -2.923844 | -0.384104 |
| 6                | 6                | 0              | -5.561844               | -2.818989 | -1.479460 |
| 7                | 6                | 0              | -6.130290               | -1.571434 | -1.740467 |
| 8                | 6                | 0              | -5.838510               | -0.471464 | -0.952524 |
| 9                | 6                | 0              | -4.970348               | -0.584553 | 0.130082  |
| 10               | 8                | 0              | -4.724453               | 0.520064  | 0.882034  |
| 11               | 1                | 0              | -3.771923               | 0.543516  | 1.093900  |
| 12               | 1                | 0              | -6.267880               | 0.500724  | -1.162837 |
| 13               | 1                | 0              | -6.806624               | -1.457619 | -2.581900 |
| 14               | 1                | 0              | -4.279016               | -3.890745 | -0.142973 |

|    |   |   |           |           |           |
|----|---|---|-----------|-----------|-----------|
| 15 | 1 | 0 | -3.973199 | -1.498047 | 2.519996  |
| 16 | 1 | 0 | -3.444176 | -3.072072 | 1.910438  |
| 17 | 6 | 0 | -0.362101 | 1.369554  | 0.718136  |
| 18 | 6 | 0 | -0.341364 | 1.143287  | -0.744357 |
| 19 | 1 | 0 | -1.360752 | 1.193881  | -1.132492 |
| 20 | 1 | 0 | 0.130943  | 0.197755  | -1.001894 |
| 21 | 1 | 0 | 0.220101  | 1.960629  | -1.202427 |
| 22 | 1 | 0 | 0.113022  | 0.673125  | 1.384348  |
| 23 | 6 | 0 | -0.836442 | 2.655178  | 1.304452  |
| 24 | 6 | 0 | -1.476577 | 3.615794  | 0.335432  |
| 25 | 1 | 0 | -1.506142 | 2.407456  | 2.131013  |
| 26 | 1 | 0 | 0.061190  | 3.093106  | 1.751452  |
| 27 | 6 | 0 | -0.711337 | 4.609209  | -0.272100 |
| 28 | 6 | 0 | -1.281471 | 5.475926  | -1.196305 |
| 29 | 6 | 0 | -2.626353 | 5.356713  | -1.523914 |
| 30 | 6 | 0 | -3.395933 | 4.366906  | -0.924128 |
| 31 | 6 | 0 | -2.824793 | 3.500977  | -0.000265 |
| 32 | 1 | 0 | 0.341433  | 4.696852  | -0.022130 |
| 33 | 1 | 0 | -0.674425 | 6.245326  | -1.659853 |
| 34 | 1 | 0 | -3.073438 | 6.033219  | -2.243386 |
| 35 | 1 | 0 | -4.446040 | 4.266913  | -1.174298 |
| 36 | 1 | 0 | -3.434850 | 2.726753  | 0.452134  |
| 37 | 8 | 0 | 1.910091  | 1.704480  | 0.712168  |
| 38 | 6 | 0 | 2.343550  | 0.546183  | 0.920033  |
| 39 | 8 | 0 | 1.793558  | -0.385867 | 1.531894  |
| 40 | 6 | 0 | 3.726522  | 0.242684  | 0.357357  |
| 41 | 6 | 0 | 4.038916  | -0.993840 | -0.199110 |
| 42 | 6 | 0 | 5.315127  | -1.339193 | -0.595968 |
| 43 | 6 | 0 | 6.304893  | -0.382618 | -0.448610 |
| 44 | 6 | 0 | 6.045155  | 0.873259  | 0.075868  |
| 45 | 6 | 0 | 4.751853  | 1.175385  | 0.474427  |
| 46 | 7 | 0 | 2.975817  | -1.983634 | -0.445245 |
| 47 | 8 | 0 | 1.997644  | -1.599580 | -1.057486 |
| 48 | 8 | 0 | 3.166755  | -3.117961 | -0.071769 |

|    |   |   |           |           |           |
|----|---|---|-----------|-----------|-----------|
| 49 | 1 | 0 | 5.539735  | -2.311079 | -1.012876 |
| 50 | 7 | 0 | 7.677195  | -0.717970 | -0.872207 |
| 51 | 8 | 0 | 7.861857  | -1.817890 | -1.350472 |
| 52 | 8 | 0 | 8.532897  | 0.127703  | -0.714990 |
| 53 | 1 | 0 | 6.851184  | 1.588201  | 0.167898  |
| 54 | 1 | 0 | 4.514127  | 2.146700  | 0.889298  |
| 55 | 6 | 0 | -5.862295 | -4.005221 | -2.358275 |
| 56 | 1 | 0 | -6.939639 | -4.138495 | -2.486904 |
| 57 | 1 | 0 | -5.458744 | -4.926993 | -1.934442 |
| 58 | 1 | 0 | -5.426300 | -3.877433 | -3.353597 |
| 59 | 6 | 0 | -1.099193 | -2.204996 | 0.063722  |
| 60 | 1 | 0 | -0.052285 | -1.905881 | -0.027937 |
| 61 | 1 | 0 | -1.631228 | -1.991511 | -0.864520 |
| 62 | 1 | 0 | -1.138614 | -3.278877 | 0.261197  |
| 63 | 6 | 0 | -0.900233 | -1.640341 | 2.891483  |
| 64 | 1 | 0 | 0.114463  | -1.265050 | 2.720258  |
| 65 | 1 | 0 | -0.856841 | -2.714348 | 3.085694  |
| 66 | 1 | 0 | -1.348378 | -1.131866 | 3.746894  |

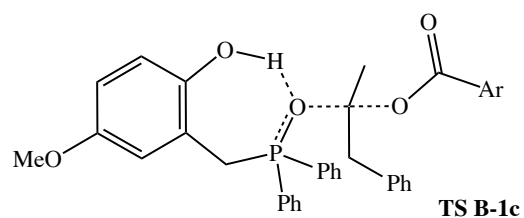

| Center<br>Number | Atomic<br>Number | Atomic<br>Type | Coordinates (Angstroms) |           |           |
|------------------|------------------|----------------|-------------------------|-----------|-----------|
|                  |                  |                | X                       | Y         | Z         |
| 1                | 15               | 0              | 1.787048                | -0.158947 | 0.830524  |
| 2                | 8                | 0              | 1.602901                | 1.186727  | 0.110769  |
| 3                | 6                | 0              | 1.253137                | -1.523601 | -0.260506 |
| 4                | 6                | 0              | 2.259408                | -1.819141 | -1.347165 |

|    |   |   |           |           |           |
|----|---|---|-----------|-----------|-----------|
| 5  | 6 | 0 | 2.972108  | -3.022463 | -1.295900 |
| 6  | 6 | 0 | 3.889401  | -3.355205 | -2.282822 |
| 7  | 6 | 0 | 4.094111  | -2.474958 | -3.346252 |
| 8  | 6 | 0 | 3.411430  | -1.277393 | -3.391964 |
| 9  | 6 | 0 | 2.504399  | -0.928324 | -2.391885 |
| 10 | 8 | 0 | 1.877466  | 0.278714  | -2.501403 |
| 11 | 1 | 0 | 1.764292  | 0.671337  | -1.620184 |
| 12 | 1 | 0 | 3.573066  | -0.575907 | -4.201494 |
| 13 | 1 | 0 | 4.804477  | -2.746687 | -4.117302 |
| 14 | 1 | 0 | 2.781730  | -3.695330 | -0.469366 |
| 15 | 1 | 0 | 0.271427  | -1.237286 | -0.660031 |
| 16 | 1 | 0 | 1.097662  | -2.407922 | 0.361221  |
| 17 | 6 | 0 | 3.545335  | -0.399019 | 1.147750  |
| 18 | 6 | 0 | 4.452929  | 0.521395  | 0.631324  |
| 19 | 6 | 0 | 5.816243  | 0.301851  | 0.787958  |
| 20 | 6 | 0 | 6.267173  | -0.831306 | 1.451489  |
| 21 | 6 | 0 | 5.358804  | -1.749941 | 1.969293  |
| 22 | 6 | 0 | 3.997581  | -1.536469 | 1.818003  |
| 23 | 1 | 0 | 4.084084  | 1.401166  | 0.115464  |
| 24 | 1 | 0 | 6.525763  | 1.016100  | 0.387409  |
| 25 | 1 | 0 | 7.331275  | -1.001834 | 1.567995  |
| 26 | 1 | 0 | 5.713500  | -2.631063 | 2.491002  |
| 27 | 1 | 0 | 3.288755  | -2.249270 | 2.227371  |
| 28 | 6 | 0 | 0.909829  | -0.320107 | 2.395221  |
| 29 | 6 | 0 | 1.543931  | 0.049691  | 3.584583  |
| 30 | 6 | 0 | 0.861936  | -0.048752 | 4.788050  |
| 31 | 6 | 0 | -0.447779 | -0.516181 | 4.807103  |
| 32 | 6 | 0 | -1.084475 | -0.874688 | 3.625574  |
| 33 | 6 | 0 | -0.412380 | -0.773281 | 2.413994  |
| 34 | 1 | 0 | 2.567755  | 0.406572  | 3.570165  |
| 35 | 1 | 0 | 1.353100  | 0.237706  | 5.710622  |
| 36 | 1 | 0 | -0.978600 | -0.595164 | 5.749055  |
| 37 | 1 | 0 | -2.113891 | -1.209163 | 3.631899  |
| 38 | 1 | 0 | -0.936984 | -1.009323 | 1.491892  |

|    |   |   |           |           |           |
|----|---|---|-----------|-----------|-----------|
| 39 | 6 | 0 | -0.268553 | 1.946143  | -0.335661 |
| 40 | 6 | 0 | -0.590788 | 2.535493  | 0.986679  |
| 41 | 1 | 0 | 0.279139  | 3.067062  | 1.376144  |
| 42 | 1 | 0 | -0.926307 | 1.778585  | 1.692322  |
| 43 | 1 | 0 | -1.397188 | 3.257625  | 0.841010  |
| 44 | 1 | 0 | -0.515055 | 0.919716  | -0.530061 |
| 45 | 6 | 0 | 0.115825  | 2.819987  | -1.489511 |
| 46 | 6 | 0 | 1.166540  | 3.865683  | -1.195825 |
| 47 | 1 | 0 | 0.405090  | 2.198619  | -2.337118 |
| 48 | 1 | 0 | -0.828360 | 3.300219  | -1.765911 |
| 49 | 6 | 0 | 0.832599  | 5.071454  | -0.582917 |
| 50 | 6 | 0 | 1.809223  | 6.019061  | -0.300280 |
| 51 | 6 | 0 | 3.133823  | 5.775592  | -0.639475 |
| 52 | 6 | 0 | 3.473420  | 4.583271  | -1.268343 |
| 53 | 6 | 0 | 2.496568  | 3.635819  | -1.543880 |
| 54 | 1 | 0 | -0.202612 | 5.274539  | -0.328036 |
| 55 | 1 | 0 | 1.532176  | 6.952082  | 0.177333  |
| 56 | 1 | 0 | 3.896201  | 6.515757  | -0.424669 |
| 57 | 1 | 0 | 4.502830  | 4.392113  | -1.551029 |
| 58 | 1 | 0 | 2.763741  | 2.708562  | -2.039022 |
| 59 | 8 | 0 | -2.481723 | 1.720373  | -0.921414 |
| 60 | 6 | 0 | -2.770934 | 0.535185  | -0.644550 |
| 61 | 8 | 0 | -2.008125 | -0.408487 | -0.367879 |
| 62 | 6 | 0 | -4.252112 | 0.180004  | -0.700853 |
| 63 | 6 | 0 | -4.889931 | -0.507274 | 0.326660  |
| 64 | 6 | 0 | -6.188597 | -0.966934 | 0.235990  |
| 65 | 6 | 0 | -6.875543 | -0.693605 | -0.933741 |
| 66 | 6 | 0 | -6.298555 | 0.010210  | -1.979421 |
| 67 | 6 | 0 | -4.987847 | 0.443602  | -1.852351 |
| 68 | 7 | 0 | -4.192016 | -0.710683 | 1.605047  |
| 69 | 8 | 0 | -3.575683 | 0.234285  | 2.050258  |
| 70 | 8 | 0 | -4.310207 | -1.789802 | 2.149533  |
| 71 | 1 | 0 | -6.656698 | -1.511293 | 1.044080  |
| 72 | 7 | 0 | -8.267650 | -1.161671 | -1.060022 |

|    |   |   |           |           |           |
|----|---|---|-----------|-----------|-----------|
| 73 | 8 | 0 | -8.746789 | -1.754245 | -0.115424 |
| 74 | 8 | 0 | -8.845074 | -0.924734 | -2.100717 |
| 75 | 1 | 0 | -6.877080 | 0.204464  | -2.872146 |
| 76 | 1 | 0 | -4.511927 | 0.992540  | -2.655075 |
| 77 | 6 | 0 | 4.469327  | -5.399044 | -1.231079 |
| 78 | 1 | 0 | 4.734066  | -4.932232 | -0.274083 |
| 79 | 1 | 0 | 5.152445  | -6.223450 | -1.428083 |
| 80 | 1 | 0 | 3.445715  | -5.788317 | -1.172661 |
| 81 | 8 | 0 | 4.622589  | -4.499127 | -2.302911 |

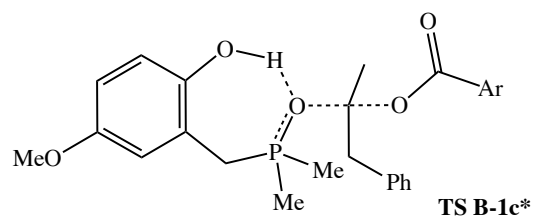

| Center Number | Atomic Number | Atomic Type | Coordinates (Angstroms) |           |           |
|---------------|---------------|-------------|-------------------------|-----------|-----------|
|               |               |             | X                       | Y         | Z         |
| 1             | 15            | 0           | -1.779163               | -0.968130 | 1.589581  |
| 2             | 8             | 0           | -1.885473               | 0.519413  | 1.221120  |
| 3             | 6             | 0           | -3.469765               | -1.577634 | 1.875258  |
| 4             | 6             | 0           | -4.335632               | -1.427017 | 0.648207  |
| 5             | 6             | 0           | -4.654582               | -2.550968 | -0.122053 |
| 6             | 6             | 0           | -5.489359               | -2.439723 | -1.227128 |
| 7             | 6             | 0           | -6.013808               | -1.189682 | -1.561652 |
| 8             | 6             | 0           | -5.685052               | -0.076075 | -0.815893 |
| 9             | 6             | 0           | -4.834189               | -0.174469 | 0.284727  |
| 10            | 8             | 0           | -4.552443               | 0.953364  | 0.995612  |
| 11            | 1             | 0           | -3.594342               | 0.965589  | 1.175965  |
| 12            | 1             | 0           | -6.074073               | 0.901058  | -1.075418 |
| 13            | 1             | 0           | -6.670158               | -1.116722 | -2.420097 |

|    |   |   |           |           |           |
|----|---|---|-----------|-----------|-----------|
| 14 | 1 | 0 | -4.253427 | -3.512589 | 0.174379  |
| 15 | 1 | 0 | -3.873669 | -0.990142 | 2.706543  |
| 16 | 1 | 0 | -3.416954 | -2.621633 | 2.194845  |
| 17 | 6 | 0 | -0.134172 | 1.571732  | 0.682529  |
| 18 | 6 | 0 | -0.164584 | 1.258615  | -0.763494 |
| 19 | 1 | 0 | -1.189650 | 1.343555  | -1.130159 |
| 20 | 1 | 0 | 0.247644  | 0.274306  | -0.974719 |
| 21 | 1 | 0 | 0.428237  | 2.014649  | -1.283330 |
| 22 | 1 | 0 | 0.315135  | 0.887836  | 1.378600  |
| 23 | 6 | 0 | -0.517411 | 2.915601  | 1.200202  |
| 24 | 6 | 0 | -1.138147 | 3.849215  | 0.192839  |
| 25 | 1 | 0 | -1.169914 | 2.757908  | 2.061839  |
| 26 | 1 | 0 | 0.418153  | 3.328798  | 1.589490  |
| 27 | 6 | 0 | -0.344737 | 4.767615  | -0.491546 |
| 28 | 6 | 0 | -0.899724 | 5.606892  | -1.449776 |
| 29 | 6 | 0 | -2.257585 | 5.535019  | -1.734648 |
| 30 | 6 | 0 | -3.055534 | 4.619929  | -1.058091 |
| 31 | 6 | 0 | -2.499472 | 3.781561  | -0.100381 |
| 32 | 1 | 0 | 0.717731  | 4.818410  | -0.274559 |
| 33 | 1 | 0 | -0.270599 | 6.317903  | -1.973234 |
| 34 | 1 | 0 | -2.692767 | 6.190222  | -2.480636 |
| 35 | 1 | 0 | -4.115961 | 4.557160  | -1.274502 |
| 36 | 1 | 0 | -3.131949 | 3.065041  | 0.412137  |
| 37 | 8 | 0 | 2.153037  | 1.761237  | 0.611994  |
| 38 | 6 | 0 | 2.521149  | 0.593056  | 0.881175  |
| 39 | 8 | 0 | 1.925385  | -0.269375 | 1.550200  |
| 40 | 6 | 0 | 3.878224  | 0.179436  | 0.325503  |
| 41 | 6 | 0 | 4.114989  | -1.101761 | -0.163158 |
| 42 | 6 | 0 | 5.365618  | -1.539934 | -0.549801 |
| 43 | 6 | 0 | 6.408843  | -0.634134 | -0.464059 |
| 44 | 6 | 0 | 6.225429  | 0.661631  | -0.008900 |
| 45 | 6 | 0 | 4.955484  | 1.057773  | 0.382173  |
| 46 | 7 | 0 | 2.996239  | -2.042593 | -0.346087 |
| 47 | 8 | 0 | 2.033403  | -1.638546 | -0.969245 |

|    |   |   |           |           |           |
|----|---|---|-----------|-----------|-----------|
| 48 | 8 | 0 | 3.129184  | -3.164228 | 0.086937  |
| 49 | 1 | 0 | 5.530917  | -2.544603 | -0.913278 |
| 50 | 7 | 0 | 7.755573  | -1.069435 | -0.878820 |
| 51 | 8 | 0 | 7.873752  | -2.203846 | -1.293311 |
| 52 | 8 | 0 | 8.658326  | -0.265022 | -0.778577 |
| 53 | 1 | 0 | 7.071016  | 1.334120  | 0.036425  |
| 54 | 1 | 0 | 4.776920  | 2.062512  | 0.743676  |
| 55 | 6 | 0 | -1.042942 | -1.979270 | 0.297425  |
| 56 | 1 | 0 | 0.013973  | -1.727145 | 0.182880  |
| 57 | 1 | 0 | -1.571682 | -1.808994 | -0.641570 |
| 58 | 1 | 0 | -1.121048 | -3.034779 | 0.568702  |
| 59 | 6 | 0 | -0.806025 | -1.242620 | 3.080352  |
| 60 | 1 | 0 | 0.225851  | -0.937342 | 2.876797  |
| 61 | 1 | 0 | -0.819001 | -2.300941 | 3.350311  |
| 62 | 1 | 0 | -1.218170 | -0.651035 | 3.899592  |
| 63 | 6 | 0 | -5.345803 | -4.753103 | -1.730897 |
| 64 | 1 | 0 | -4.250220 | -4.772453 | -1.780515 |
| 65 | 1 | 0 | -5.748315 | -5.421769 | -2.489536 |
| 66 | 1 | 0 | -5.670176 | -5.097009 | -0.741282 |
| 67 | 8 | 0 | -5.854673 | -3.473730 | -2.027505 |

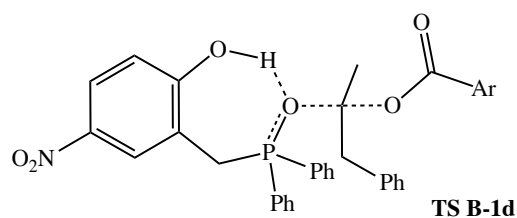

| Center<br>Number | Atomic<br>Number | Atomic<br>Type | Coordinates (Angstroms) |          |          |
|------------------|------------------|----------------|-------------------------|----------|----------|
|                  |                  |                | X                       | Y        | Z        |
| <hr/>            |                  |                |                         |          |          |
| 1                | 15               | 0              | 1.919039                | 0.087386 | 1.082196 |
| 2                | 8                | 0              | 1.661517                | 1.423060 | 0.094148 |



|    |   |   |           |           |           |
|----|---|---|-----------|-----------|-----------|
| 3  | 6 | 0 | 1.291198  | -1.422521 | 0.117424  |
| 4  | 6 | 0 | 2.165458  | -1.866964 | -1.033447 |
| 5  | 6 | 0 | 2.632774  | -3.184711 | -1.048150 |
| 6  | 6 | 0 | 3.353531  | -3.673710 | -2.139016 |
| 7  | 6 | 0 | 3.621252  | -2.869915 | -3.253649 |
| 8  | 6 | 0 | 3.178898  | -1.555934 | -3.245835 |
| 9  | 6 | 0 | 2.474706  | -1.033857 | -2.144020 |
| 10 | 8 | 0 | 2.118266  | 0.283176  | -2.231537 |
| 11 | 1 | 0 | 1.902133  | 0.754547  | -1.361513 |
| 12 | 1 | 0 | 3.376071  | -0.890450 | -4.076750 |
| 13 | 1 | 0 | 4.173339  | -3.279463 | -4.088847 |
| 14 | 1 | 0 | 2.425619  | -3.854168 | -0.222572 |
| 15 | 1 | 0 | 0.277051  | -1.143282 | -0.204267 |
| 16 | 1 | 0 | 1.182677  | -2.235005 | 0.840700  |
| 17 | 6 | 0 | 3.750140  | -0.037692 | 1.337678  |
| 18 | 6 | 0 | 4.569596  | 0.982674  | 0.837003  |
| 19 | 6 | 0 | 5.956645  | 0.891649  | 1.003052  |
| 20 | 6 | 0 | 6.515095  | -0.211717 | 1.658312  |
| 21 | 6 | 0 | 5.690162  | -1.230117 | 2.154598  |
| 22 | 6 | 0 | 4.303529  | -1.146559 | 1.996842  |
| 23 | 1 | 0 | 4.118621  | 1.826678  | 0.326703  |
| 24 | 1 | 0 | 6.596575  | 1.678659  | 0.618764  |
| 25 | 1 | 0 | 7.590818  | -0.281370 | 1.781254  |
| 26 | 1 | 0 | 6.123884  | -2.086626 | 2.659261  |
| 27 | 1 | 0 | 3.668763  | -1.935731 | 2.388061  |
| 28 | 6 | 0 | 1.081582  | 0.122891  | 2.734012  |
| 29 | 6 | 0 | 1.810124  | 0.519799  | 3.868554  |
| 30 | 6 | 0 | 1.180531  | 0.541961  | 5.116411  |
| 31 | 6 | 0 | -0.166148 | 0.173125  | 5.229592  |
| 32 | 6 | 0 | -0.891365 | -0.210862 | 4.095449  |
| 33 | 6 | 0 | -0.273622 | -0.235879 | 2.838922  |
| 34 | 1 | 0 | 2.853368  | 0.802473  | 3.782935  |
| 35 | 1 | 0 | 1.740125  | 0.845601  | 5.994859  |
| 36 | 1 | 0 | -0.650331 | 0.188970  | 6.200624  |

|    |   |   |           |           |           |
|----|---|---|-----------|-----------|-----------|
| 37 | 1 | 0 | -1.937614 | -0.483740 | 4.163795  |
| 38 | 1 | 0 | -0.861074 | -0.504977 | 1.964646  |
| 39 | 6 | 0 | -0.312768 | 2.147036  | -0.230048 |
| 40 | 6 | 0 | -0.421301 | 3.039966  | 0.959546  |
| 41 | 1 | 0 | 0.481477  | 3.649364  | 1.053662  |
| 42 | 1 | 0 | -0.585310 | 2.474524  | 1.876817  |
| 43 | 1 | 0 | -1.269592 | 3.717903  | 0.815805  |
| 44 | 1 | 0 | -0.550959 | 1.102436  | -0.143505 |
| 45 | 6 | 0 | -0.111236 | 2.714260  | -1.615397 |
| 46 | 6 | 0 | 0.747331  | 3.962753  | -1.728889 |
| 47 | 1 | 0 | 0.264662  | 1.926359  | -2.274405 |
| 48 | 1 | 0 | -1.132050 | 2.935016  | -1.956089 |
| 49 | 6 | 0 | 0.191497  | 5.239080  | -1.534208 |
| 50 | 6 | 0 | 0.980647  | 6.389177  | -1.646636 |
| 51 | 6 | 0 | 2.338632  | 6.279156  | -1.966547 |
| 52 | 6 | 0 | 2.898882  | 5.013749  | -2.177578 |
| 53 | 6 | 0 | 2.109874  | 3.864150  | -2.060322 |
| 54 | 1 | 0 | -0.866251 | 5.333776  | -1.304095 |
| 55 | 1 | 0 | 0.533959  | 7.366928  | -1.494972 |
| 56 | 1 | 0 | 2.951030  | 7.170428  | -2.060572 |
| 57 | 1 | 0 | 3.948121  | 4.921518  | -2.441268 |
| 58 | 1 | 0 | 2.545142  | 2.886718  | -2.239416 |
| 59 | 8 | 0 | -2.577420 | 1.819114  | -0.440441 |
| 60 | 6 | 0 | -2.821505 | 0.575511  | -0.192152 |
| 61 | 8 | 0 | -1.963051 | -0.332071 | 0.082257  |
| 62 | 6 | 0 | -4.268330 | 0.143766  | -0.338278 |
| 63 | 6 | 0 | -4.892926 | -0.799325 | 0.496247  |
| 64 | 6 | 0 | -6.164884 | -1.301376 | 0.235336  |
| 65 | 6 | 0 | -6.843894 | -0.810195 | -0.877326 |
| 66 | 6 | 0 | -6.283482 | 0.156626  | -1.715879 |
| 67 | 6 | 0 | -4.999839 | 0.623566  | -1.436987 |
| 68 | 7 | 0 | -4.254302 | -1.256294 | 1.735412  |
| 69 | 8 | 0 | -3.628348 | -0.400050 | 2.420596  |
| 70 | 8 | 0 | -4.417985 | -2.460059 | 2.074712  |

|    |   |   |           |           |           |
|----|---|---|-----------|-----------|-----------|
| 71 | 1 | 0 | -6.618867 | -2.040030 | 0.881432  |
| 72 | 7 | 0 | -8.189161 | -1.316056 | -1.162800 |
| 73 | 8 | 0 | -8.678506 | -2.176143 | -0.377078 |
| 74 | 8 | 0 | -8.786063 | -0.863456 | -2.180692 |
| 75 | 1 | 0 | -6.849319 | 0.520014  | -2.563399 |
| 76 | 1 | 0 | -4.533921 | 1.367379  | -2.070673 |
| 77 | 7 | 0 | 3.829181  | -5.046432 | -2.112539 |
| 78 | 8 | 0 | 4.458878  | -5.481539 | -3.122387 |
| 79 | 8 | 0 | 3.596655  | -5.743423 | -1.078093 |

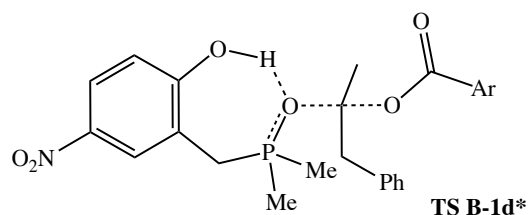


---

| Center Number | Atomic Number | Atomic Type | Coordinates (Angstroms) |   |   |
|---------------|---------------|-------------|-------------------------|---|---|
|               |               |             | X                       | Y | Z |

---

|    |    |   |          |           |           |
|----|----|---|----------|-----------|-----------|
| 1  | 15 | 0 | 1.804769 | -0.235241 | 1.886635  |
| 2  | 8  | 0 | 1.904210 | 1.275932  | 1.158449  |
| 3  | 6  | 0 | 1.858583 | -1.533719 | 0.517044  |
| 4  | 6  | 0 | 3.185219 | -1.690316 | -0.194340 |
| 5  | 6  | 0 | 3.776924 | -2.957523 | -0.232047 |
| 6  | 6  | 0 | 4.939637 | -3.180097 | -0.971105 |
| 7  | 6  | 0 | 5.542934 | -2.152210 | -1.705643 |
| 8  | 6  | 0 | 4.977684 | -0.886804 | -1.664422 |
| 9  | 6  | 0 | 3.820290 | -0.631022 | -0.903164 |
| 10 | 8  | 0 | 3.372117 | 0.659829  | -0.913179 |
| 11 | 1  | 0 | 2.782939 | 0.947042  | -0.137076 |
| 12 | 1  | 0 | 5.416691 | -0.056202 | -2.202490 |
| 13 | 1  | 0 | 6.437641 | -2.357206 | -2.278068 |

|    |   |   |           |           |           |
|----|---|---|-----------|-----------|-----------|
| 14 | 1 | 0 | 3.329779  | -3.792831 | 0.292830  |
| 15 | 1 | 0 | 1.040545  | -1.241765 | -0.155788 |
| 16 | 1 | 0 | 1.562525  | -2.484475 | 0.971011  |
| 17 | 6 | 0 | 0.103462  | 2.046455  | 0.256326  |
| 18 | 6 | 0 | -0.388033 | 2.821317  | 1.429123  |
| 19 | 1 | 0 | 0.443312  | 3.366198  | 1.886160  |
| 20 | 1 | 0 | -0.871015 | 2.181283  | 2.168094  |
| 21 | 1 | 0 | -1.117022 | 3.563792  | 1.086781  |
| 22 | 1 | 0 | -0.102527 | 0.994261  | 0.171854  |
| 23 | 6 | 0 | 0.679147  | 2.739207  | -0.949302 |
| 24 | 6 | 0 | 1.289913  | 4.110405  | -0.725810 |
| 25 | 1 | 0 | 1.391148  | 2.068664  | -1.441524 |
| 26 | 1 | 0 | -0.179507 | 2.816715  | -1.631618 |
| 27 | 6 | 0 | 0.513431  | 5.272699  | -0.871124 |
| 28 | 6 | 0 | 1.073723  | 6.537954  | -0.662472 |
| 29 | 6 | 0 | 2.422743  | 6.657225  | -0.309834 |
| 30 | 6 | 0 | 3.207204  | 5.505741  | -0.171505 |
| 31 | 6 | 0 | 2.645998  | 4.241105  | -0.378610 |
| 32 | 1 | 0 | -0.531492 | 5.186029  | -1.157251 |
| 33 | 1 | 0 | 0.460943  | 7.426014  | -0.781740 |
| 34 | 1 | 0 | 2.860503  | 7.637808  | -0.151905 |
| 35 | 1 | 0 | 4.256839  | 5.591875  | 0.091834  |
| 36 | 1 | 0 | 3.260466  | 3.352323  | -0.281187 |
| 37 | 8 | 0 | -2.047675 | 1.634761  | -0.531303 |
| 38 | 6 | 0 | -2.265259 | 0.391447  | -0.260928 |
| 39 | 8 | 0 | -1.386920 | -0.483811 | 0.062437  |
| 40 | 6 | 0 | -3.698276 | -0.080036 | -0.400403 |
| 41 | 6 | 0 | -4.296350 | -1.012919 | 0.464470  |
| 42 | 6 | 0 | -5.560747 | -1.545315 | 0.228195  |
| 43 | 6 | 0 | -6.258162 | -1.095745 | -0.890772 |
| 44 | 6 | 0 | -5.723376 | -0.141568 | -1.760097 |
| 45 | 6 | 0 | -4.446701 | 0.357230  | -1.505006 |
| 46 | 7 | 0 | -3.633537 | -1.431749 | 1.705451  |
| 47 | 8 | 0 | -3.028334 | -0.551612 | 2.378893  |

|    |   |   |           |           |           |
|----|---|---|-----------|-----------|-----------|
| 48 | 8 | 0 | -3.754815 | -2.637688 | 2.057043  |
| 49 | 1 | 0 | -5.995436 | -2.275914 | 0.896368  |
| 50 | 7 | 0 | -7.596027 | -1.634597 | -1.151004 |
| 51 | 8 | 0 | -8.061761 | -2.482949 | -0.338692 |
| 52 | 8 | 0 | -8.209964 | -1.220317 | -2.174895 |
| 53 | 1 | 0 | -6.303276 | 0.187964  | -2.611928 |
| 54 | 1 | 0 | -3.999982 | 1.092884  | -2.161835 |
| 55 | 6 | 0 | 3.272372  | -0.454616 | 3.010277  |
| 56 | 1 | 0 | 3.255843  | 0.332034  | 3.767332  |
| 57 | 1 | 0 | 4.191925  | -0.377205 | 2.427840  |
| 58 | 1 | 0 | 3.225974  | -1.434788 | 3.492105  |
| 59 | 6 | 0 | 0.255930  | -0.502256 | 2.874964  |
| 60 | 1 | 0 | 0.134324  | 0.309027  | 3.595265  |
| 61 | 1 | 0 | 0.339401  | -1.452581 | 3.409951  |
| 62 | 1 | 0 | -0.602825 | -0.539422 | 2.199019  |
| 63 | 7 | 0 | 5.526221  | -4.510543 | -0.980374 |
| 64 | 8 | 0 | 4.971647  | -5.415514 | -0.285832 |
| 65 | 8 | 0 | 6.565796  | -4.700448 | -1.678542 |

#### 5. Other molecules required for calculating values in Table 2.

H<sub>2</sub>O

| Center<br>Number | Atomic<br>Number | Atomic<br>Type | Coordinates (Angstroms) |           |           |
|------------------|------------------|----------------|-------------------------|-----------|-----------|
|                  |                  |                | X                       | Y         | Z         |
| 1                | 8                | 0              | -0.000000               | -0.117715 | 0.000000  |
| 2                | 1                | 0              | 0.754910                | 0.470861  | 0.000000  |
| 3                | 1                | 0              | -0.754910               | 0.470860  | -0.000000 |

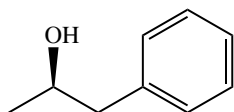


---

| Center<br>Number | Atomic<br>Number | Atomic<br>Type | Coordinates (Angstroms) |   |   |
|------------------|------------------|----------------|-------------------------|---|---|
|                  |                  |                | X                       | Y | Z |

---

|    |   |   |           |           |           |
|----|---|---|-----------|-----------|-----------|
| 1  | 1 | 0 | 0.468174  | 1.902070  | 0.905975  |
| 2  | 6 | 0 | 1.020828  | 1.042214  | 0.544331  |
| 3  | 6 | 0 | 2.419368  | -1.150409 | -0.421815 |
| 4  | 6 | 0 | 0.377435  | -0.190858 | 0.459037  |
| 5  | 6 | 0 | 2.347345  | 1.179347  | 0.156494  |
| 6  | 6 | 0 | 3.051572  | 0.083218  | -0.327616 |
| 7  | 6 | 0 | 1.092882  | -1.282908 | -0.030428 |
| 8  | 1 | 0 | 2.832827  | 2.146222  | 0.230797  |
| 9  | 1 | 0 | 4.087724  | 0.189565  | -0.628553 |
| 10 | 1 | 0 | 2.961062  | -2.012261 | -0.795796 |
| 11 | 6 | 0 | -2.025941 | -0.140548 | -0.332366 |
| 12 | 1 | 0 | 0.606095  | -2.251628 | -0.099771 |
| 13 | 6 | 0 | -3.465459 | -0.478747 | 0.035718  |
| 14 | 1 | 0 | -3.562995 | -1.527677 | 0.329244  |
| 15 | 1 | 0 | -4.133385 | -0.305023 | -0.813439 |
| 16 | 1 | 0 | -3.798534 | 0.151957  | 0.864318  |
| 17 | 6 | 0 | -1.072101 | -0.338970 | 0.845269  |
| 18 | 1 | 0 | -1.242650 | -1.331969 | 1.272333  |
| 19 | 1 | 0 | -1.338490 | 0.395970  | 1.611795  |
| 20 | 1 | 0 | -1.697147 | -0.794260 | -1.154377 |
| 21 | 8 | 0 | -1.907754 | 1.219859  | -0.720061 |
| 22 | 1 | 0 | -2.396217 | 1.344126  | -1.533787 |

---
